# Supplementary material for: Comparison of village dog and wolf genomes highlights the role of the neural crest in dog domestication
Source: PubMed Central journal article supplement (PMC6022502; doi:10.1186/s12915-018-0535-2), 2018-06-28

fastCN chw glw R2 = 0.845

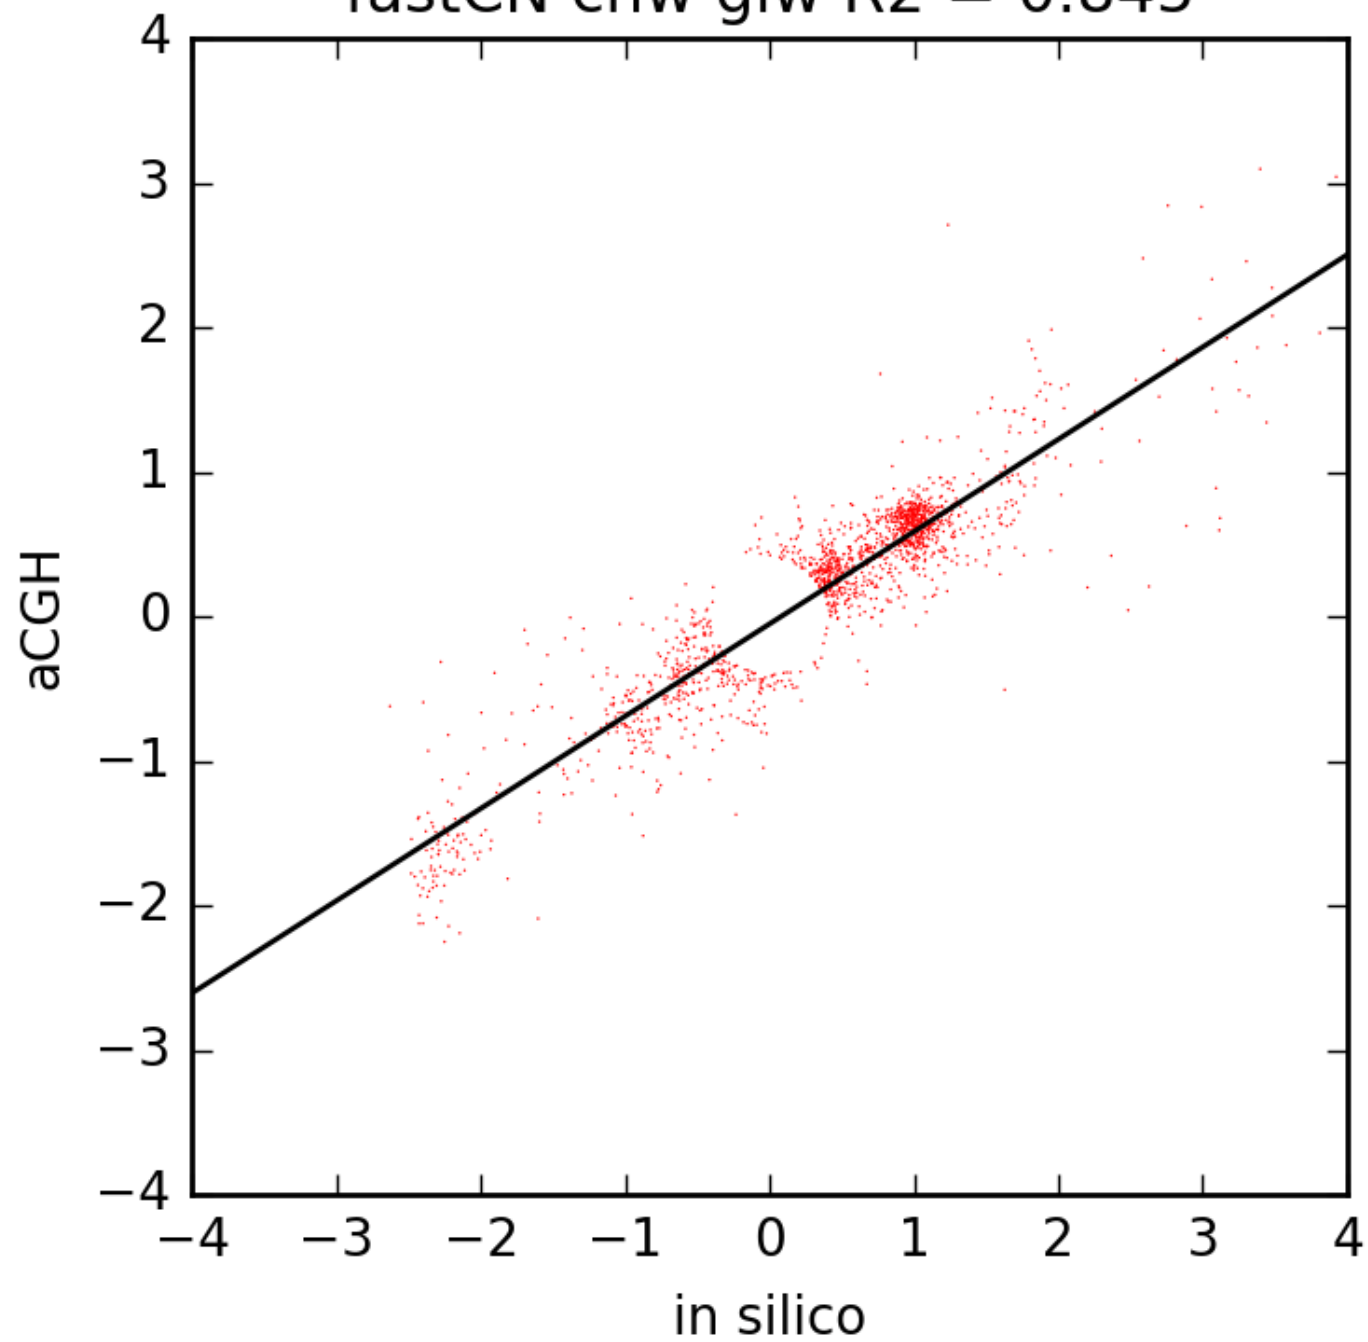

fastCN chw mxa R2 = 0.84

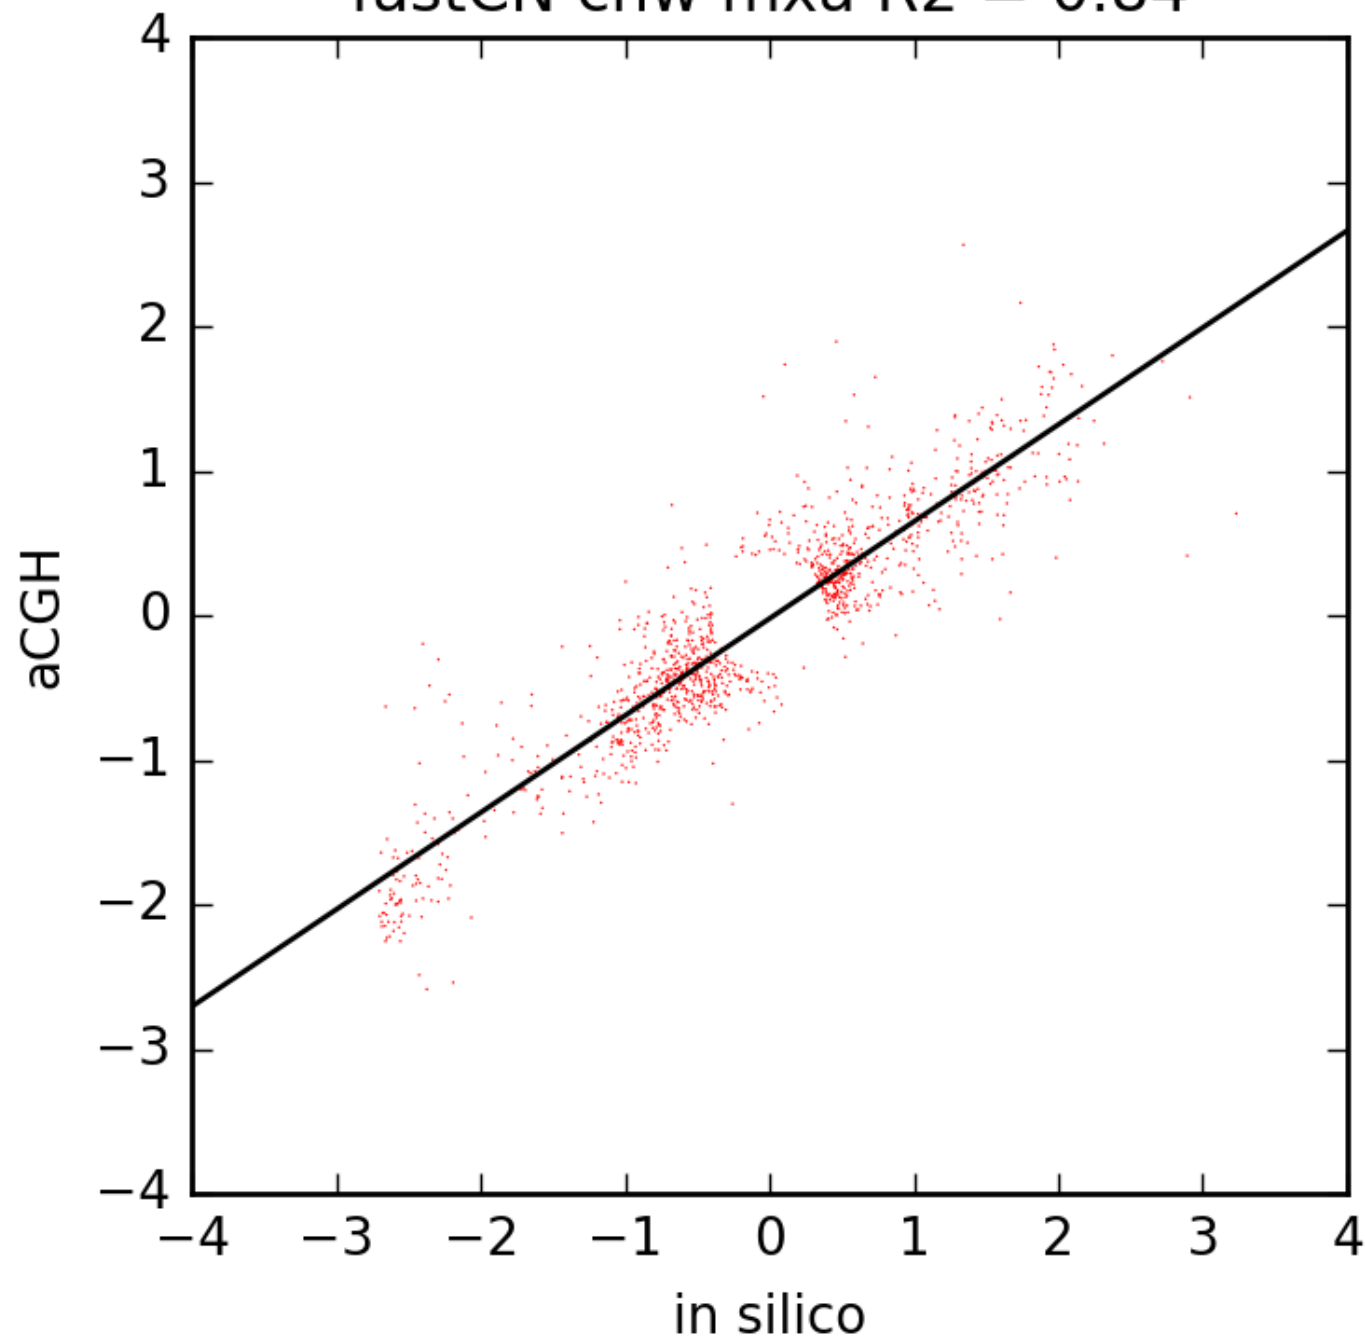

fastCN chw ptw R2 = 0.735

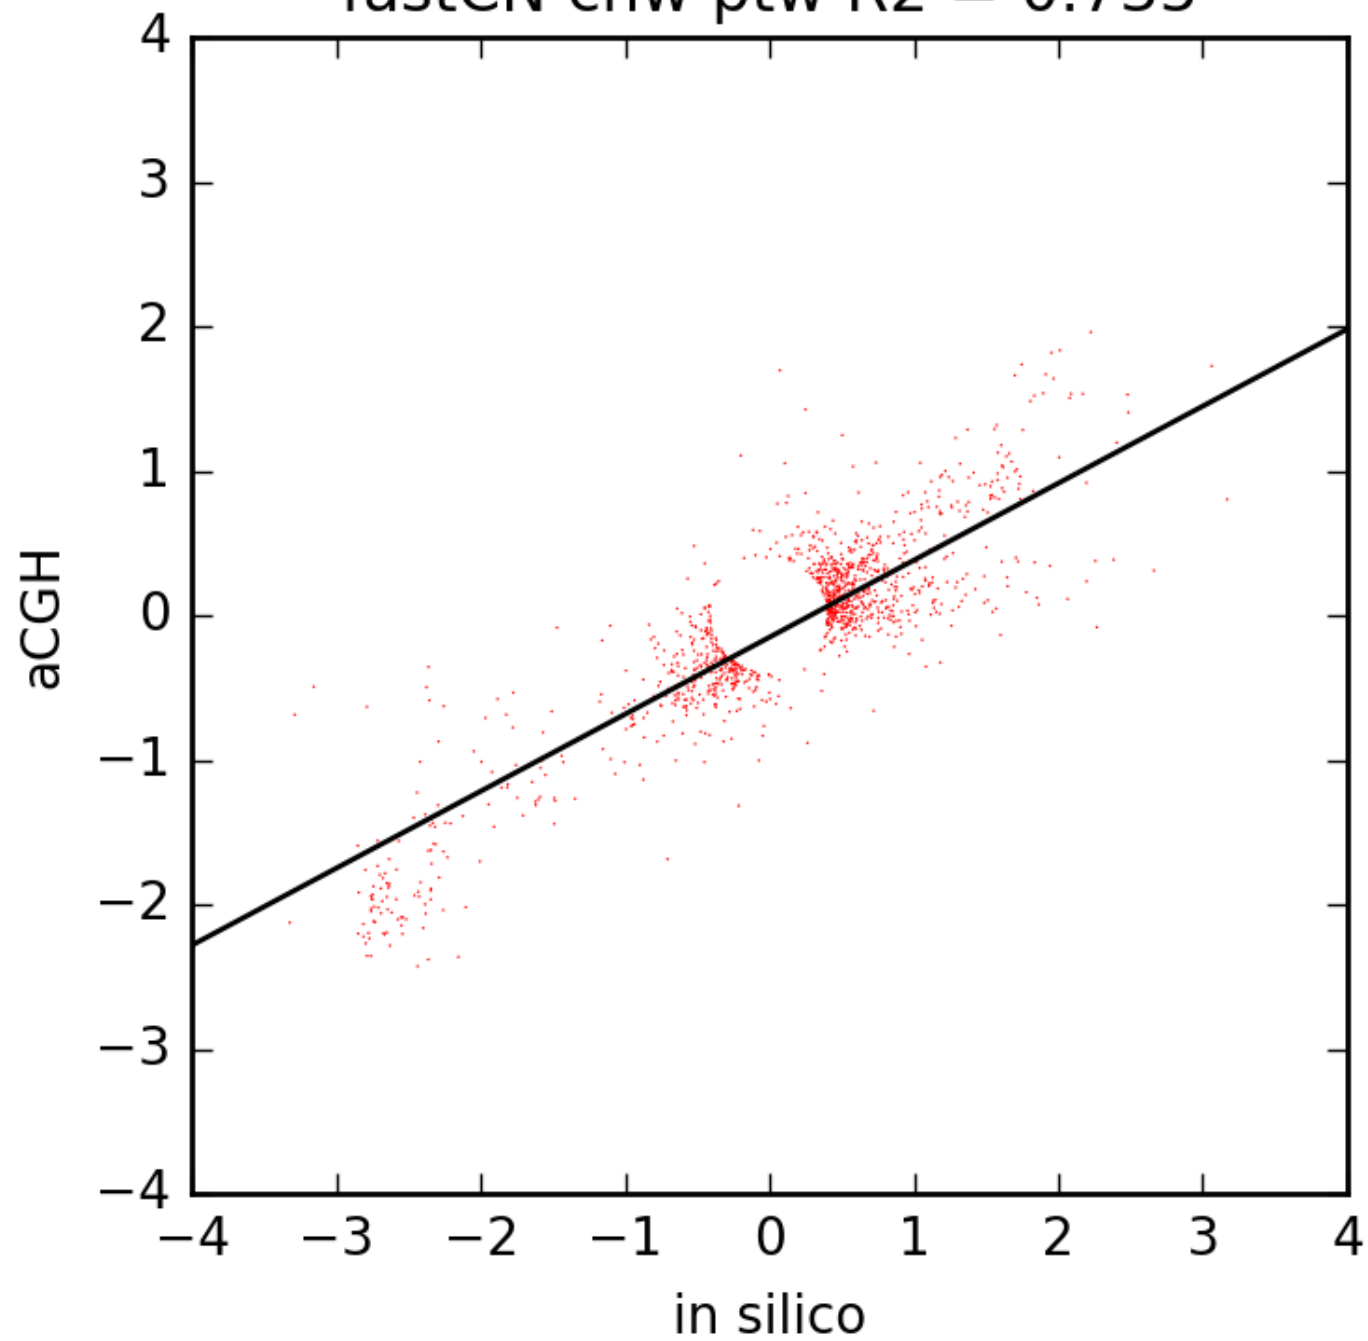

fastCN inw chw R2 = 0.895

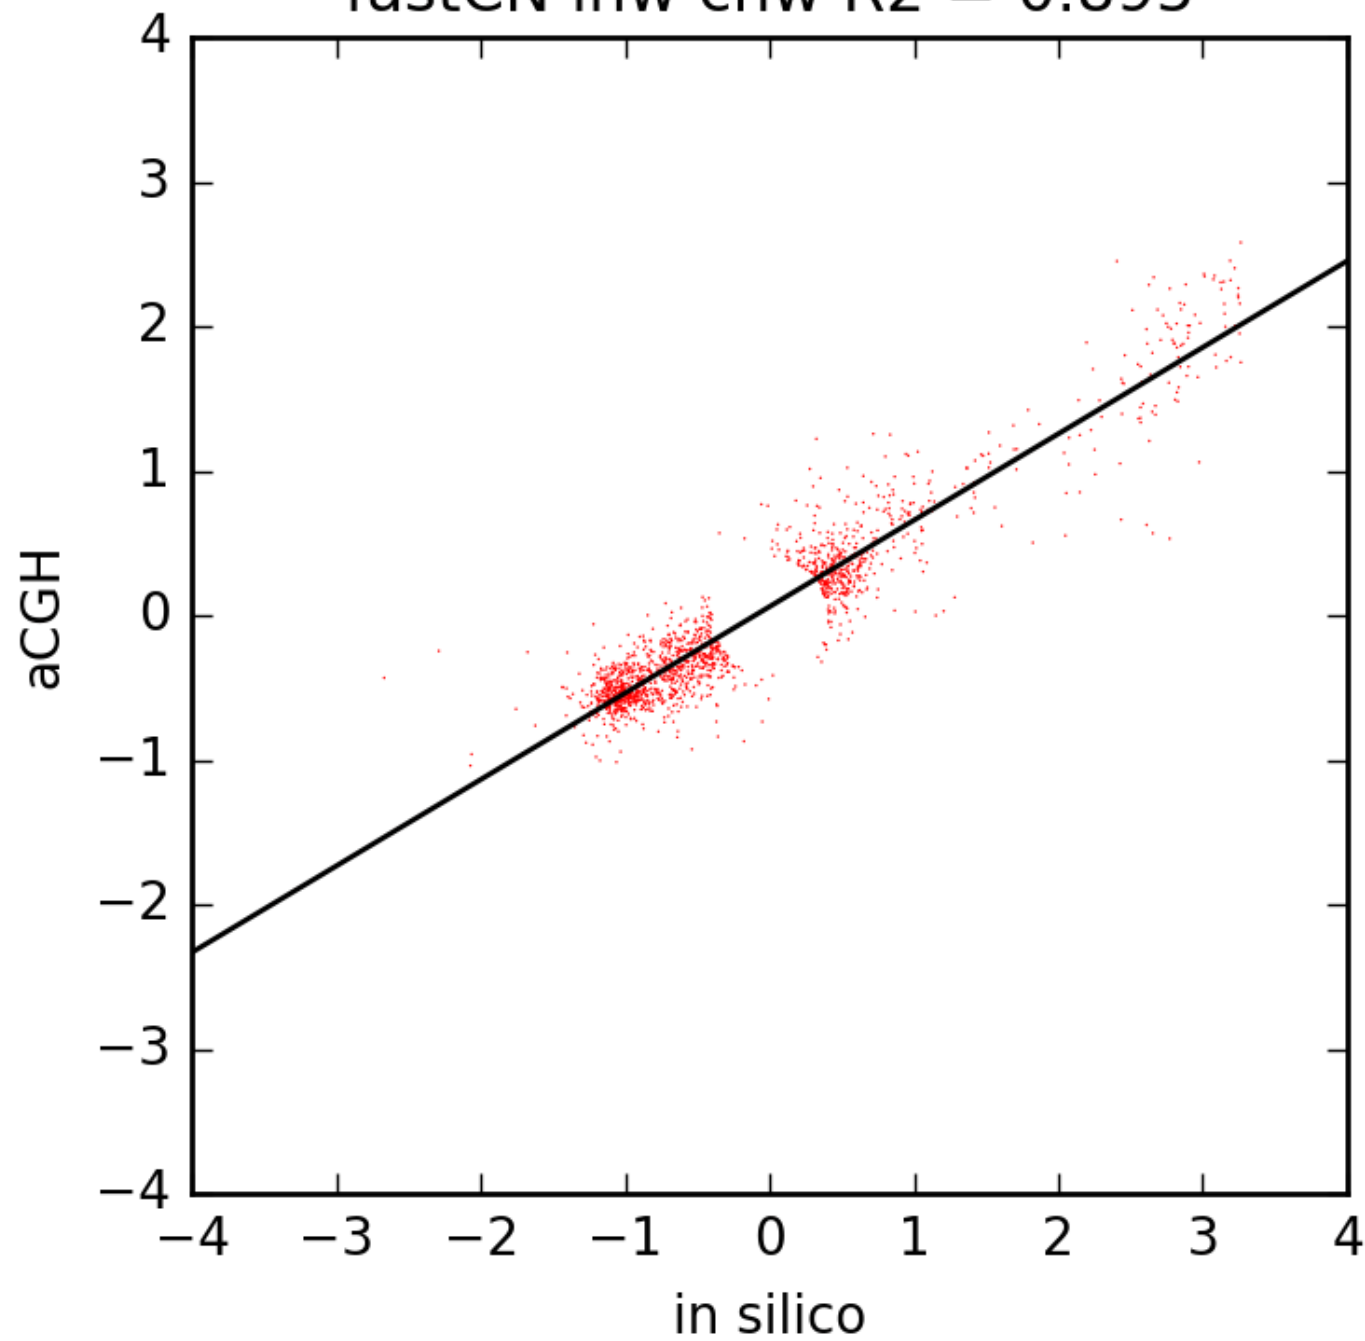

fastCN inw glw R2 = 0.7

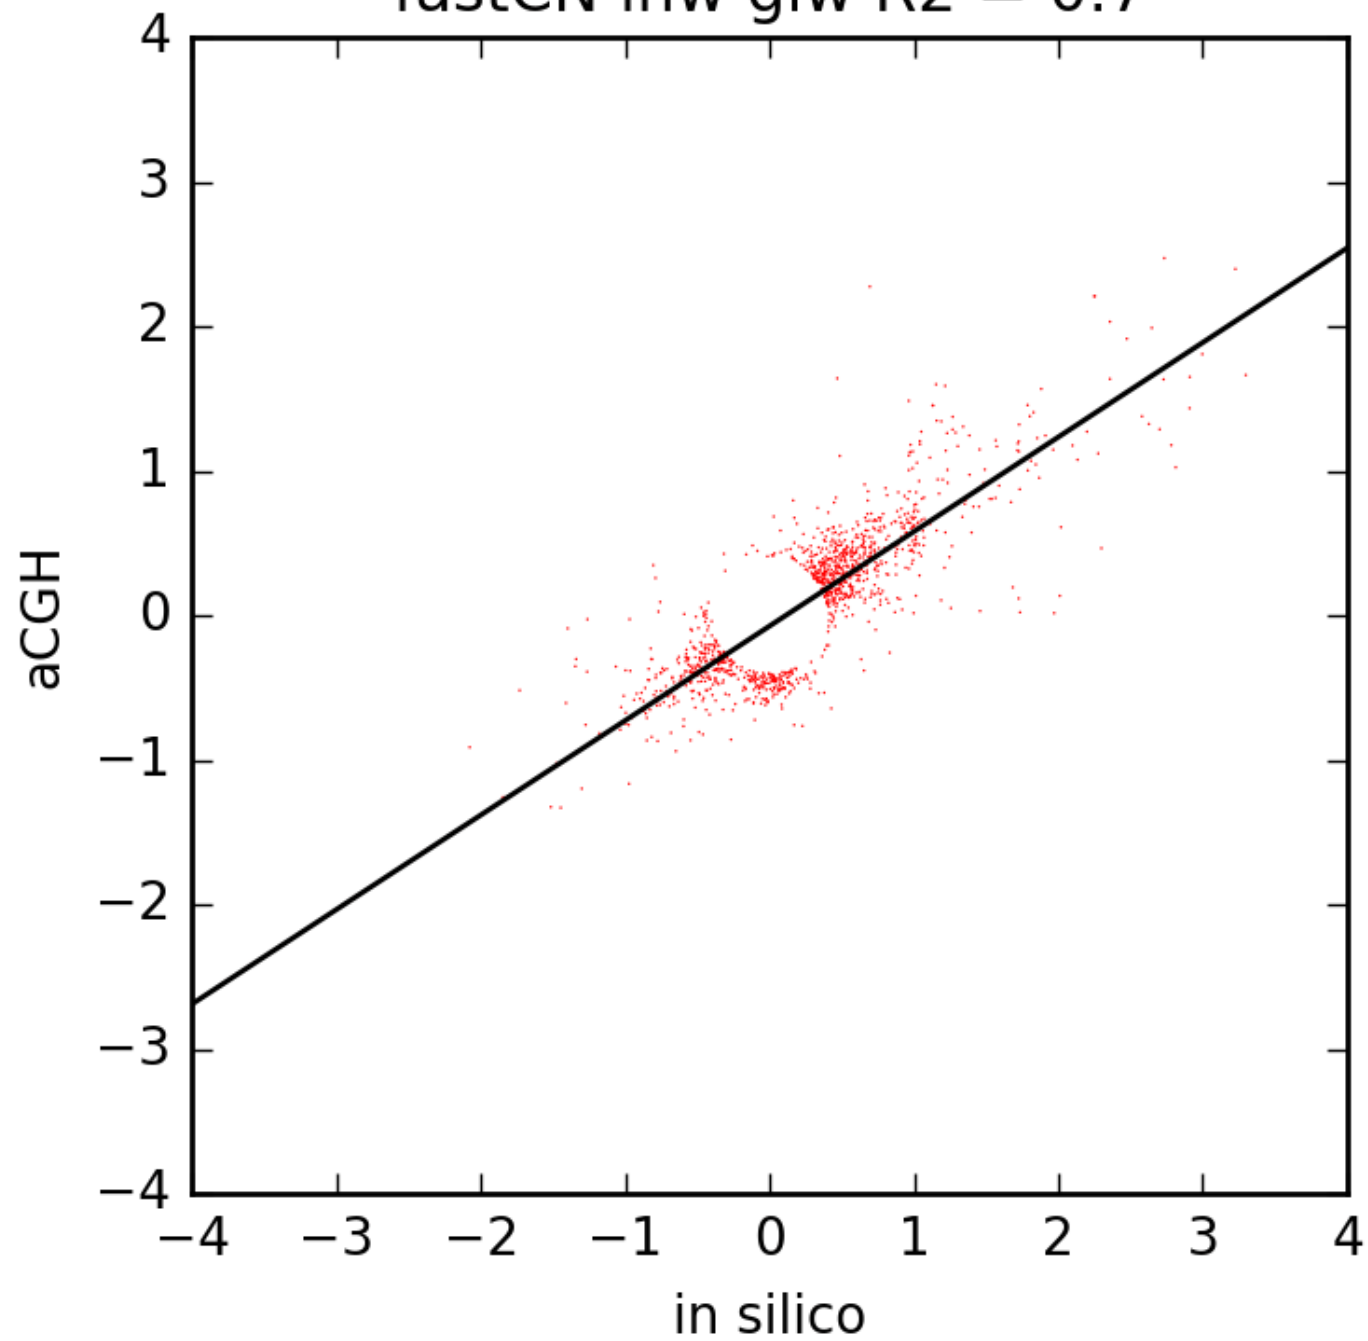

fastCN inw irw R2 = 0.607

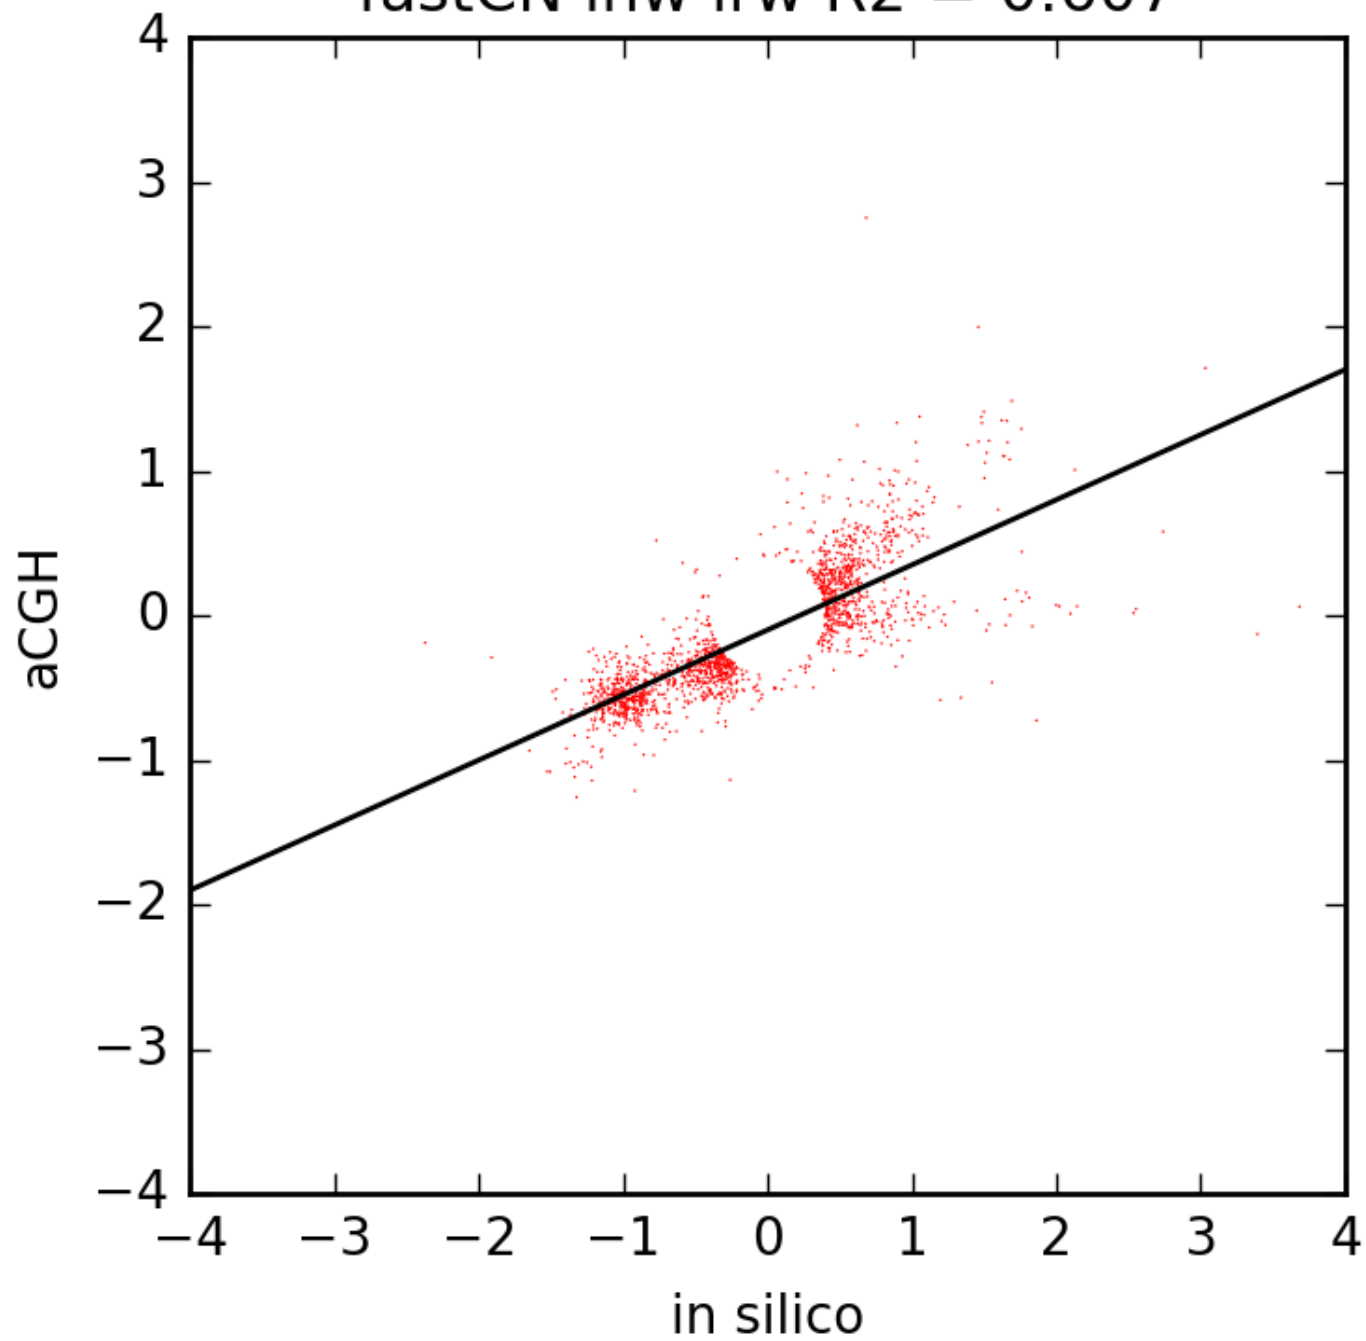

fastCN inw mxa R2 = 0.767

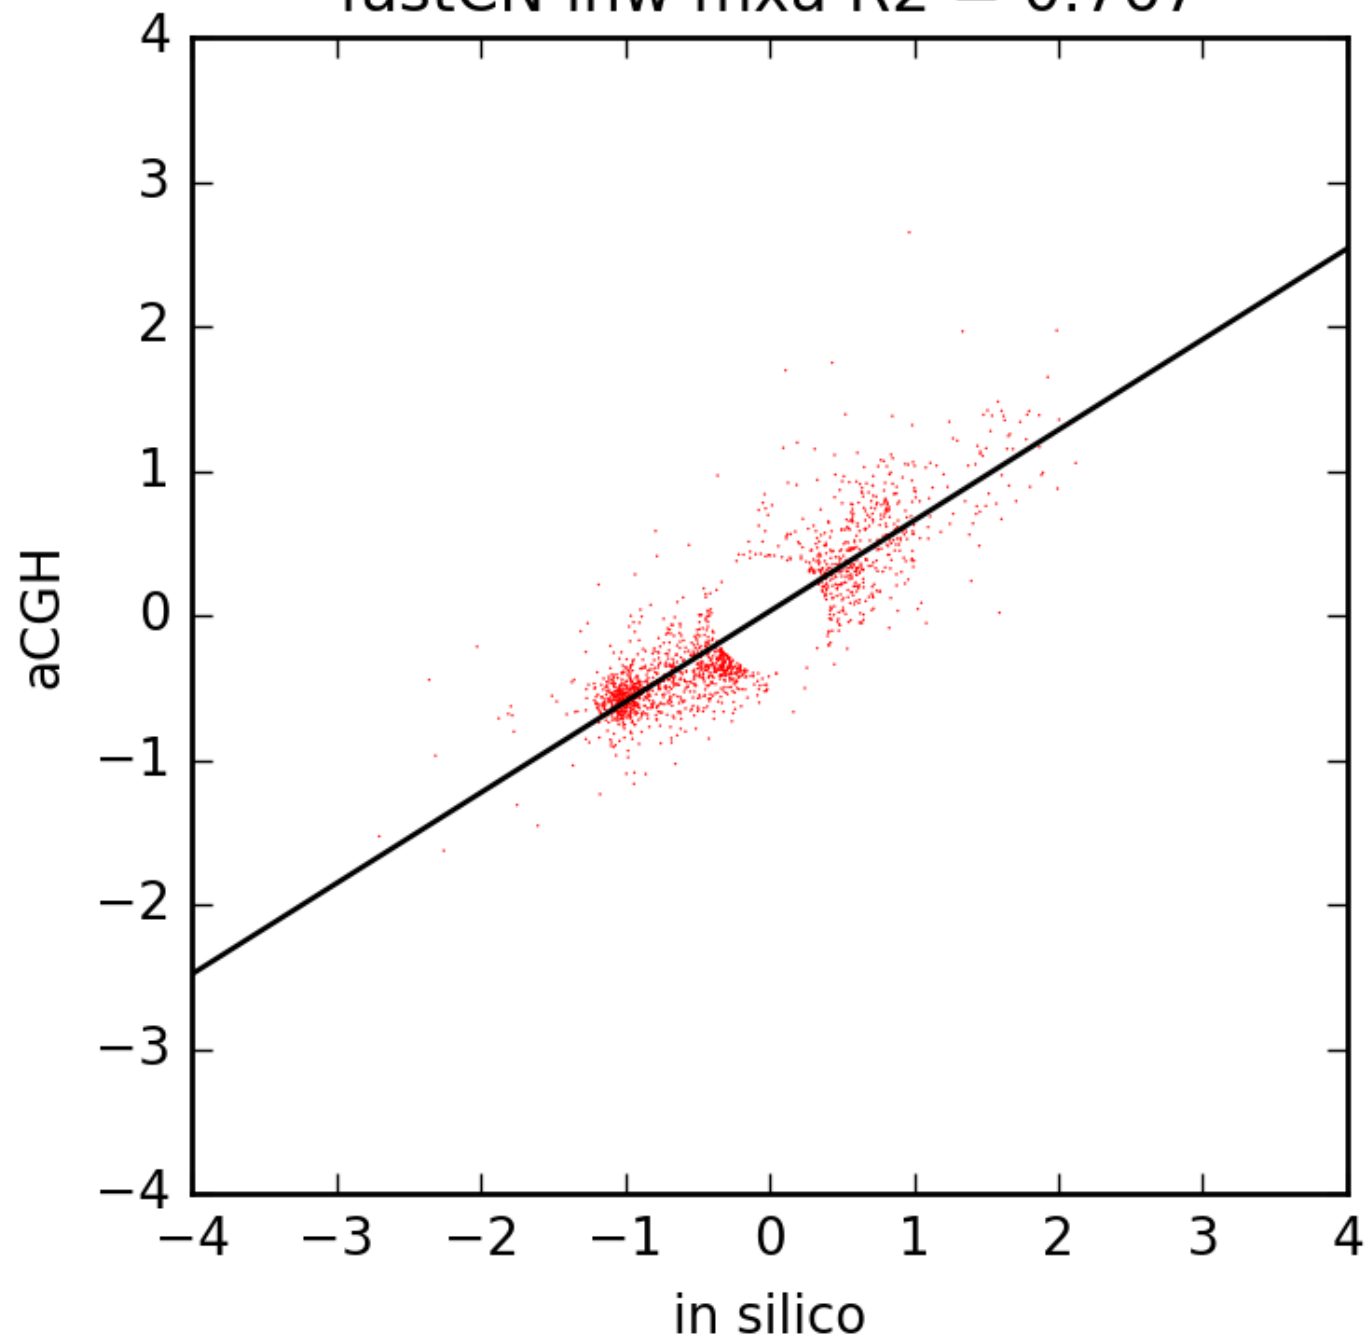

fastCN inw ptw R2 = 0.699

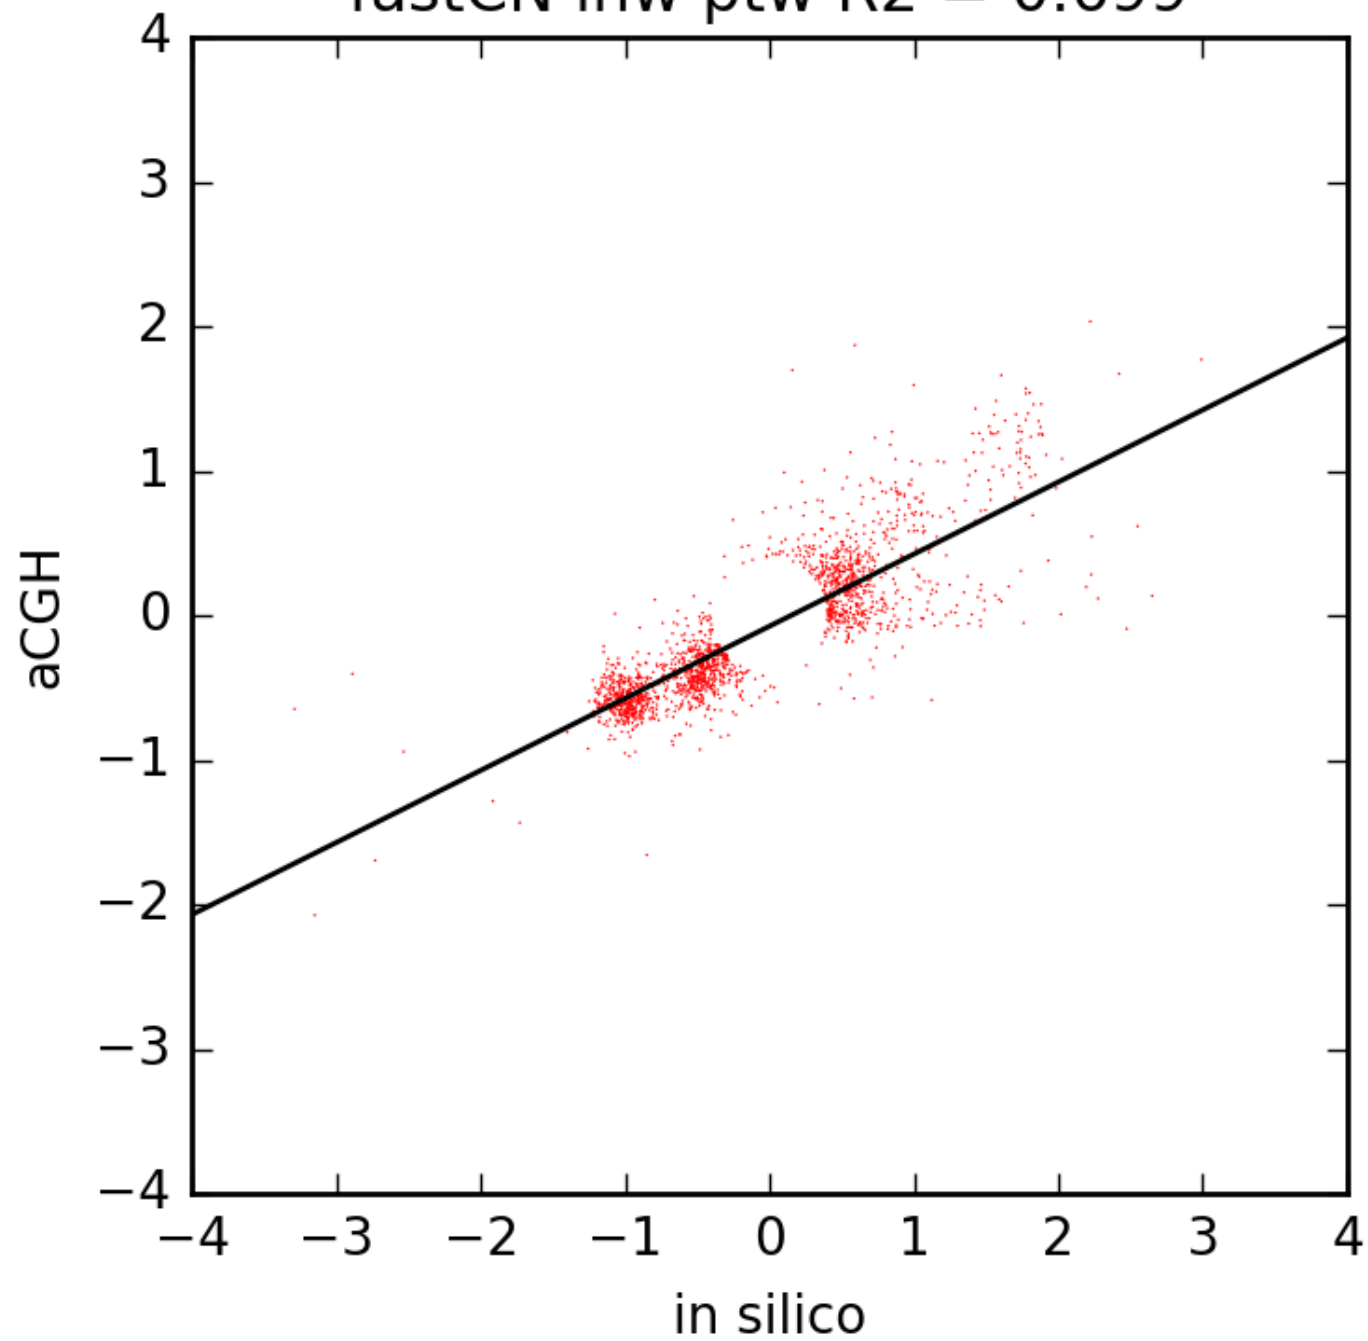



fastCN irw chw R2 = 0.697

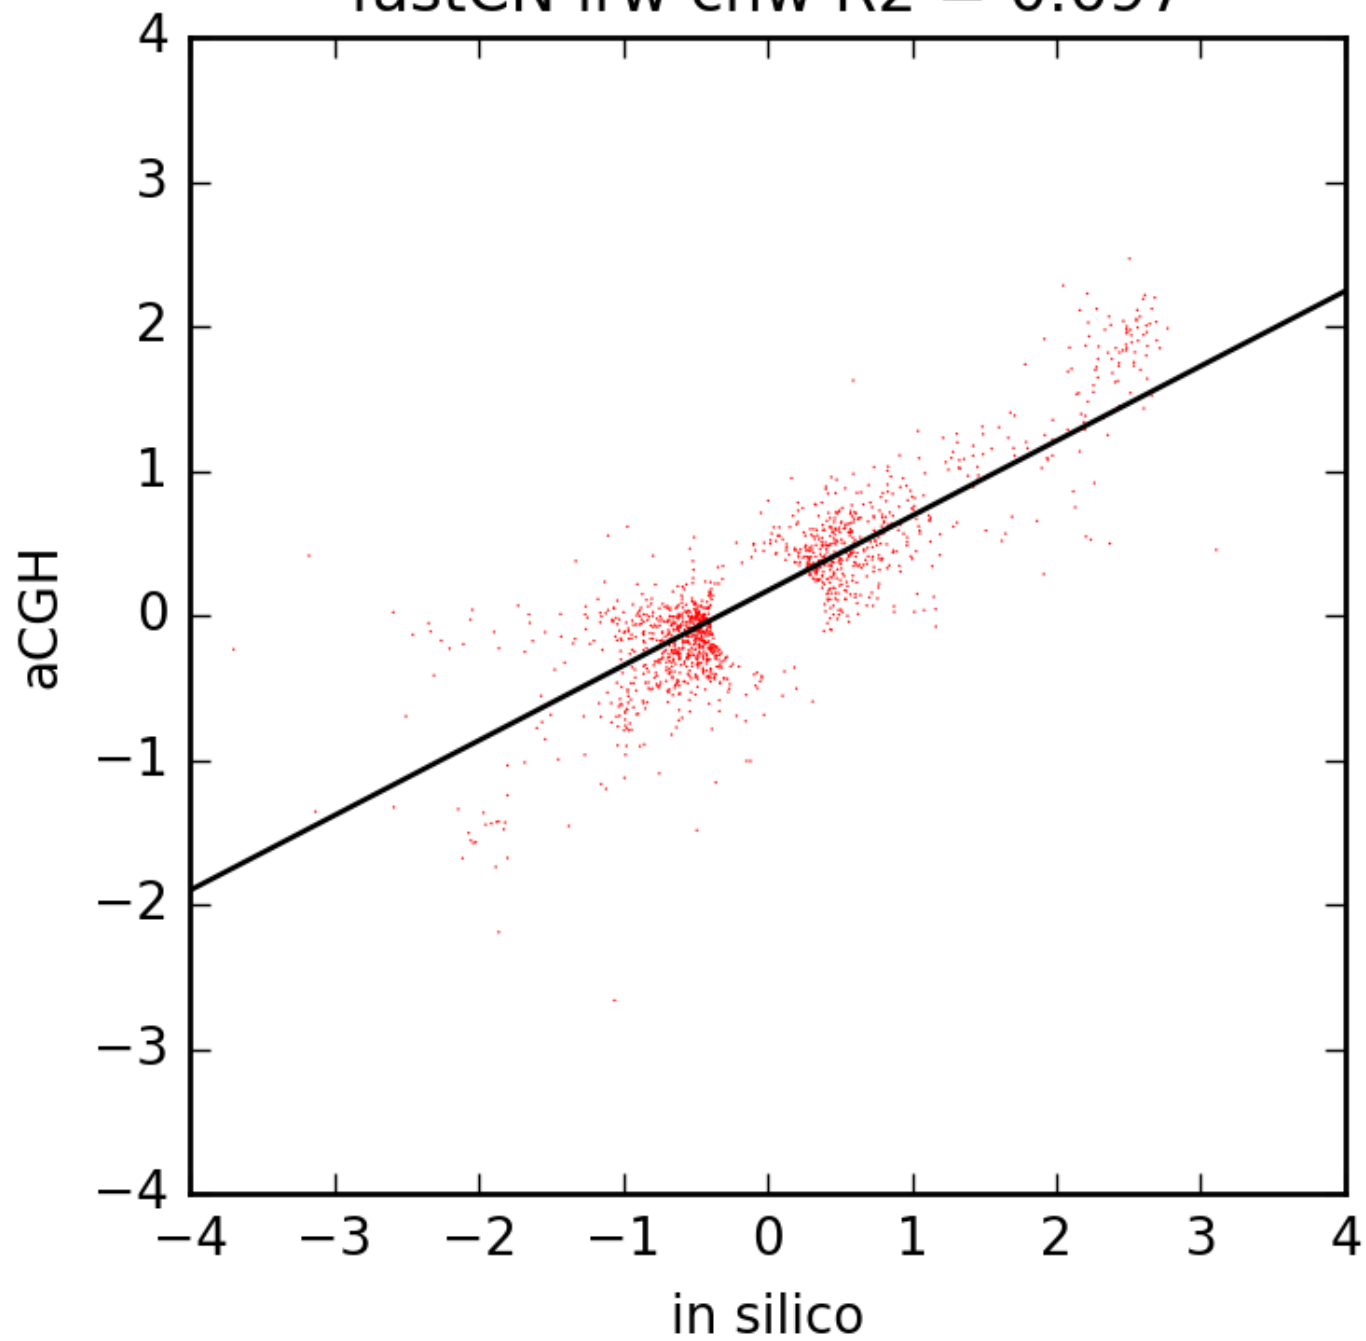

fastCN irw glw R2 = 0.691

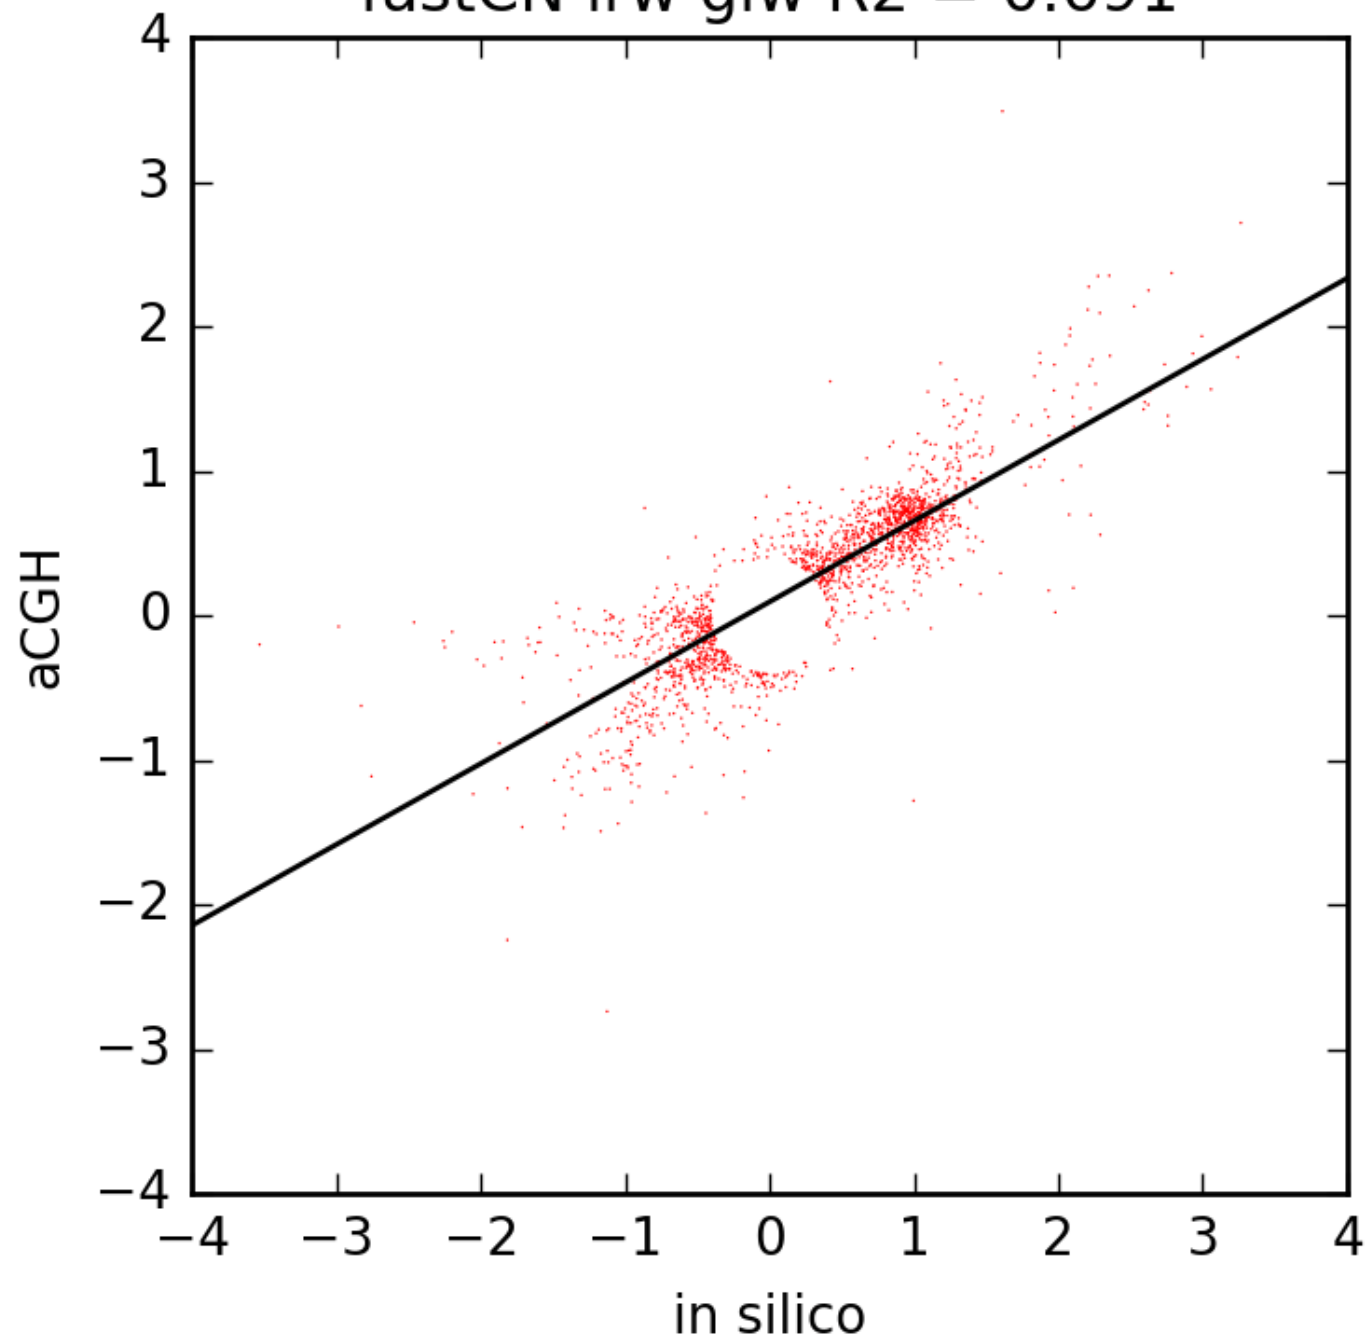

fastCN irw mxa R2 = 0.595

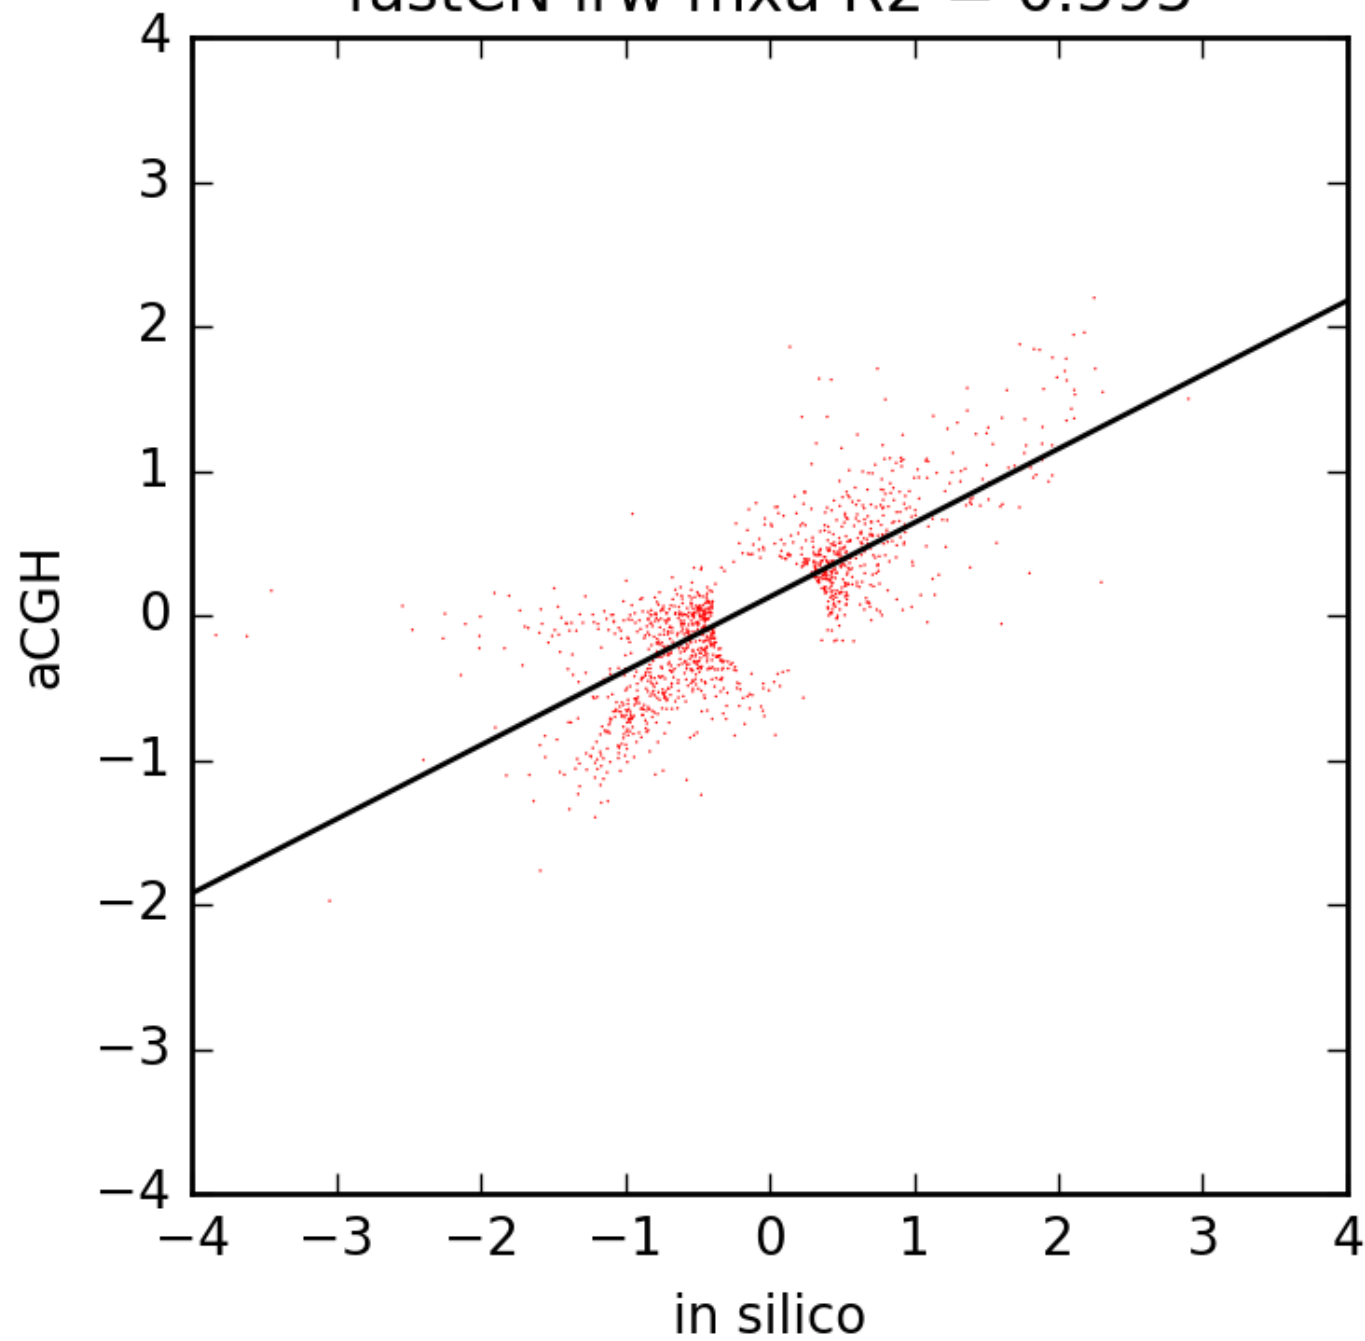

fastCN irw ptw R2 = 0.713

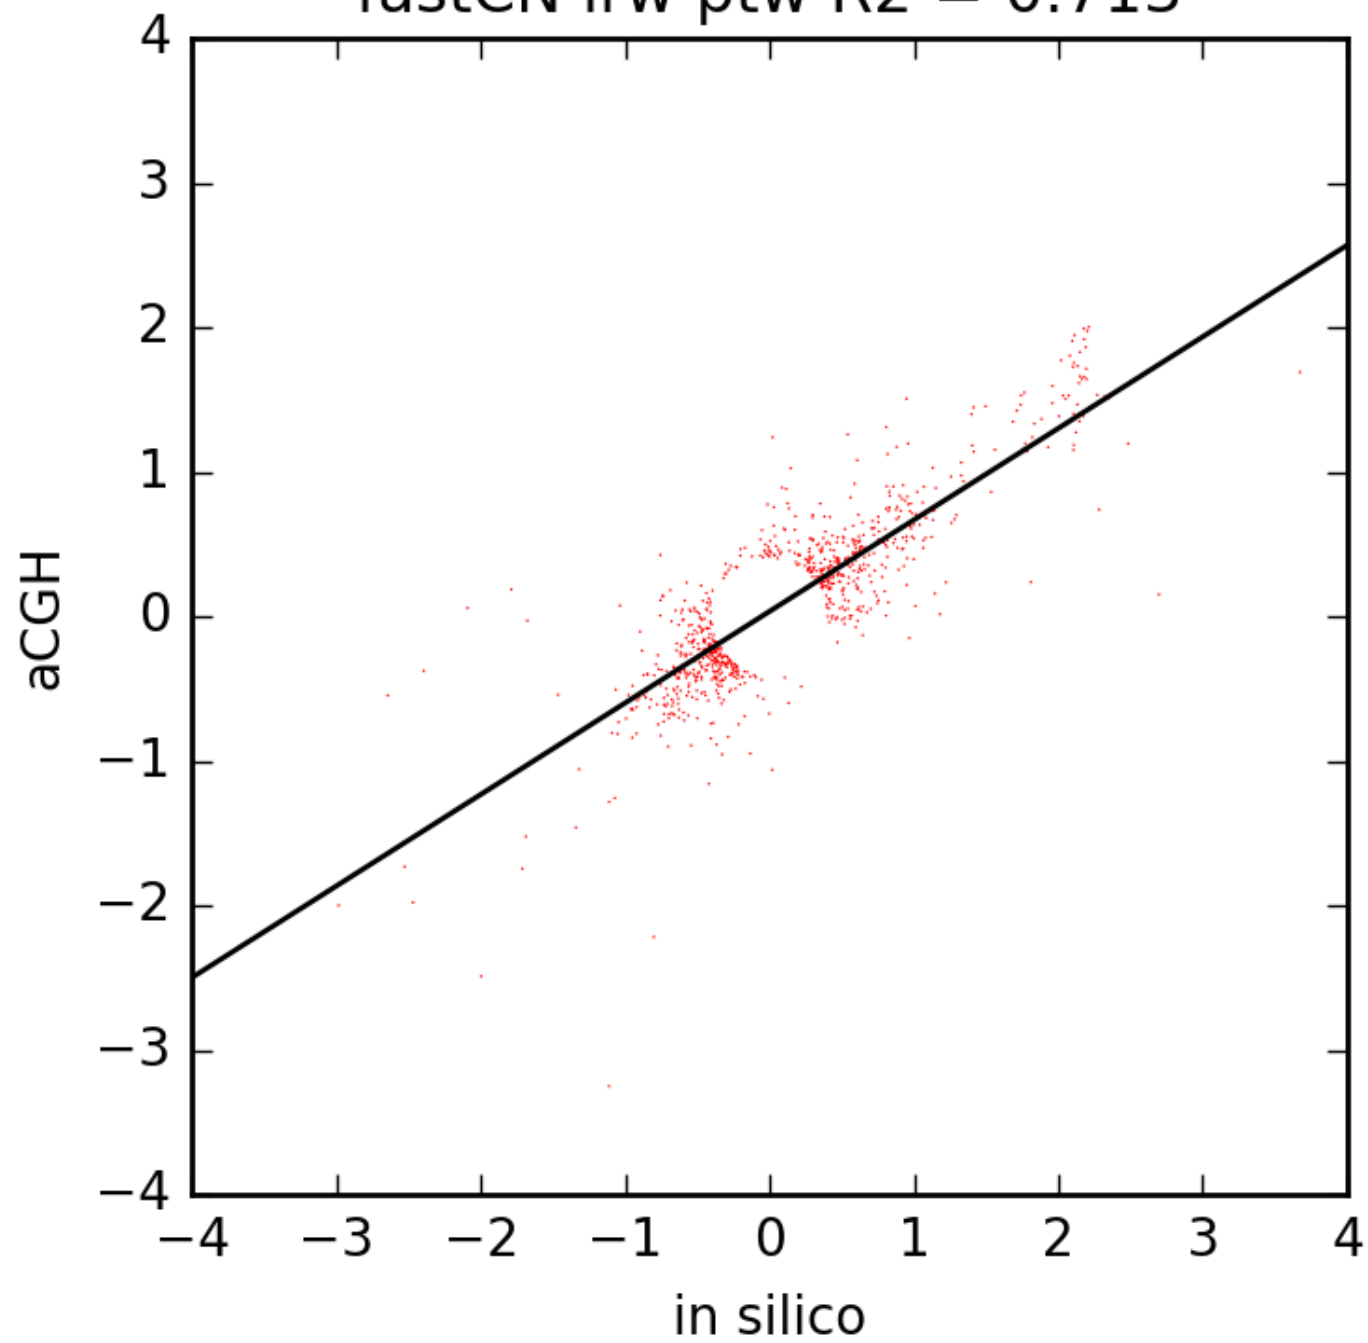

fastCN mxa glw R2 = 0.751

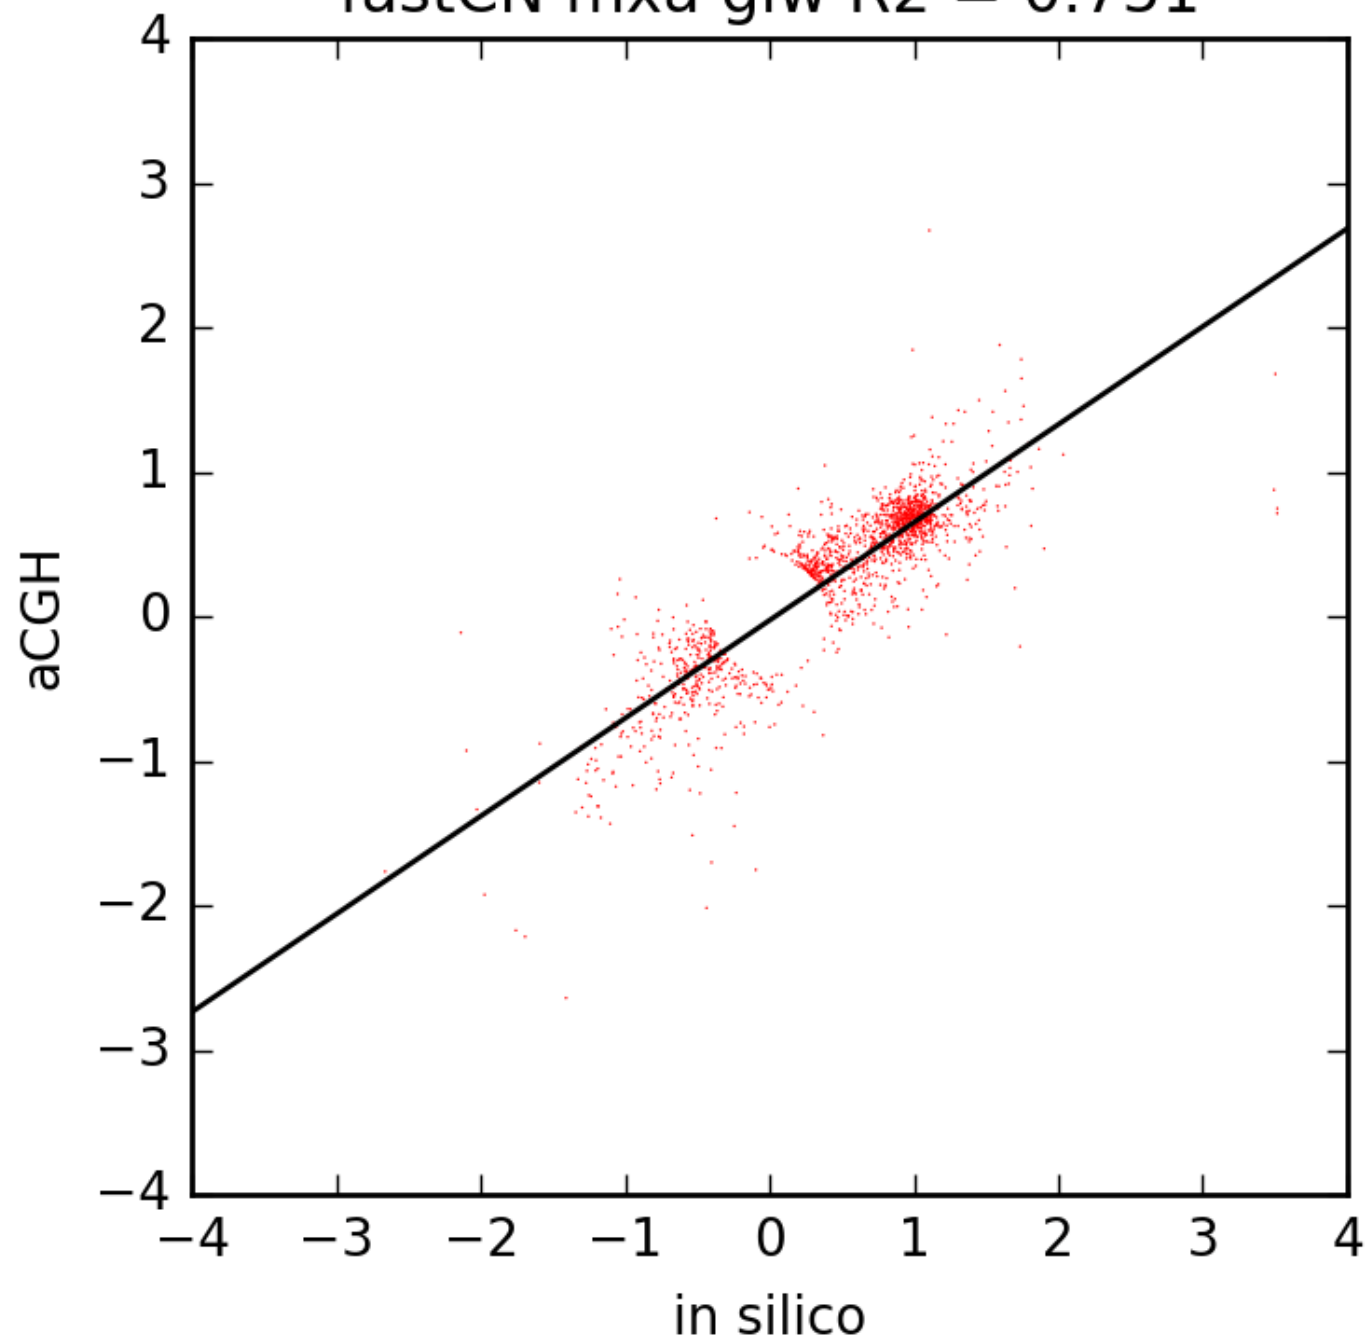

fastCN ptw glw R2 = 0.686

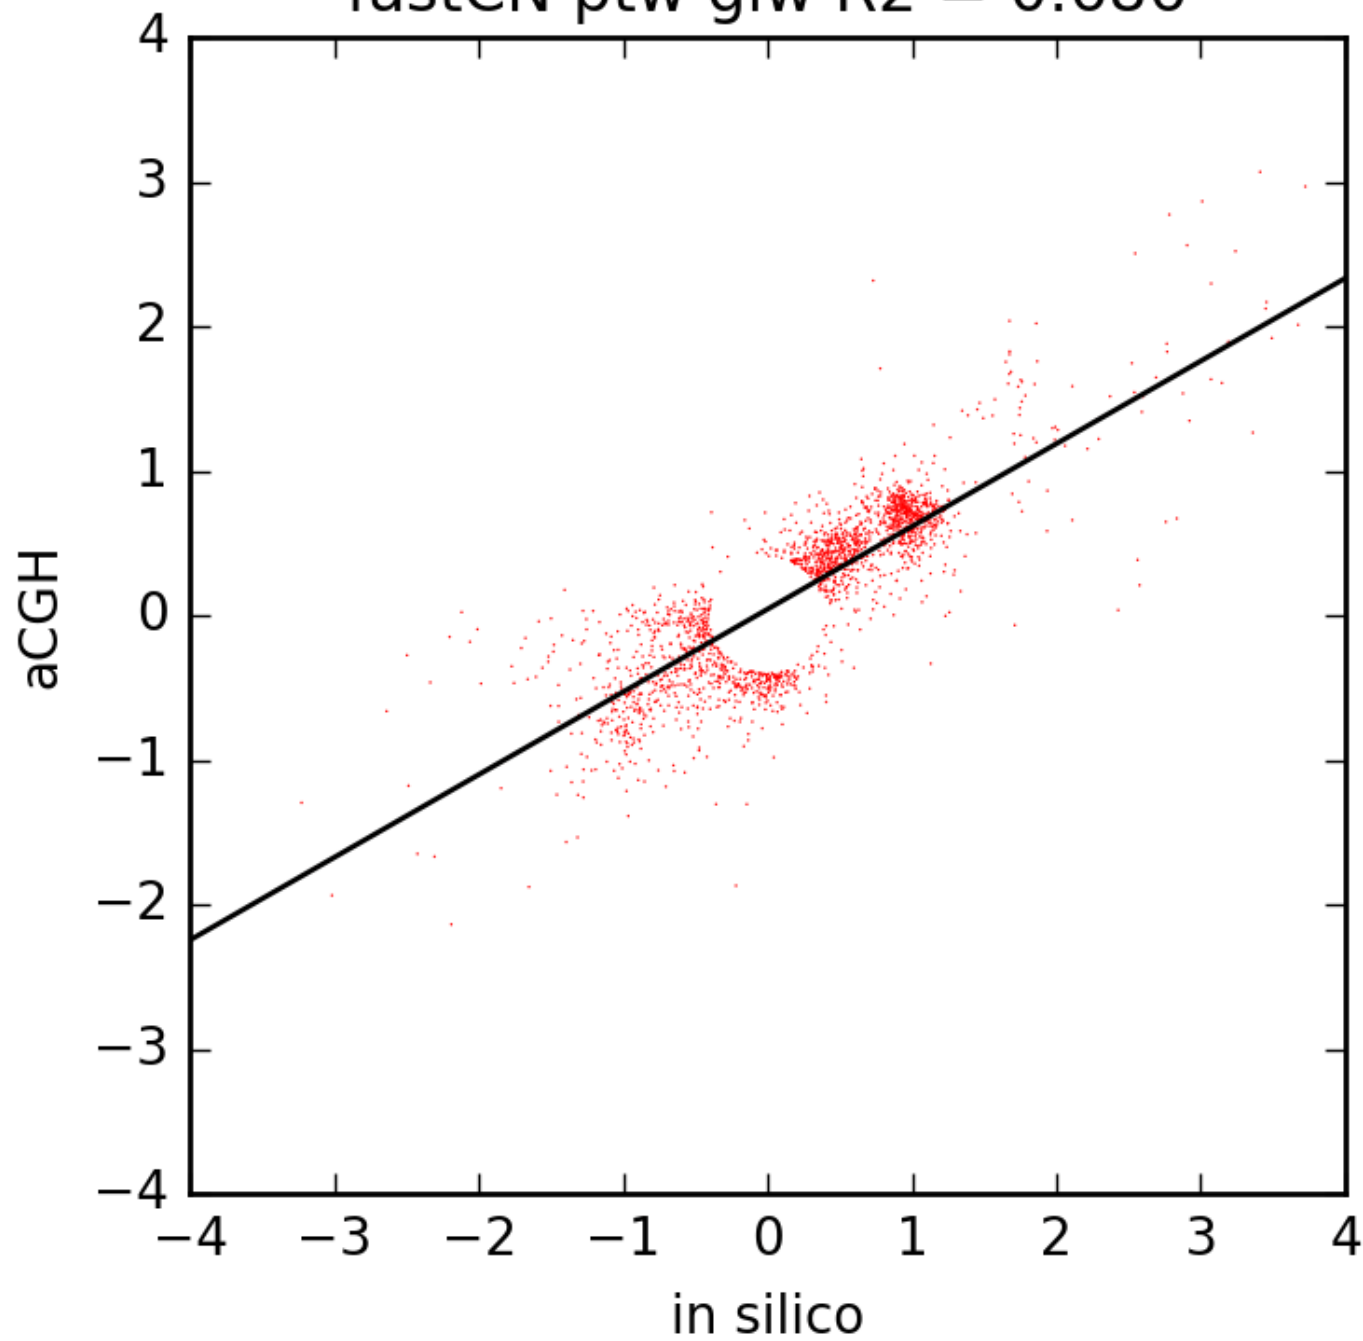

fastCN ptw mxa R2 = 0.625

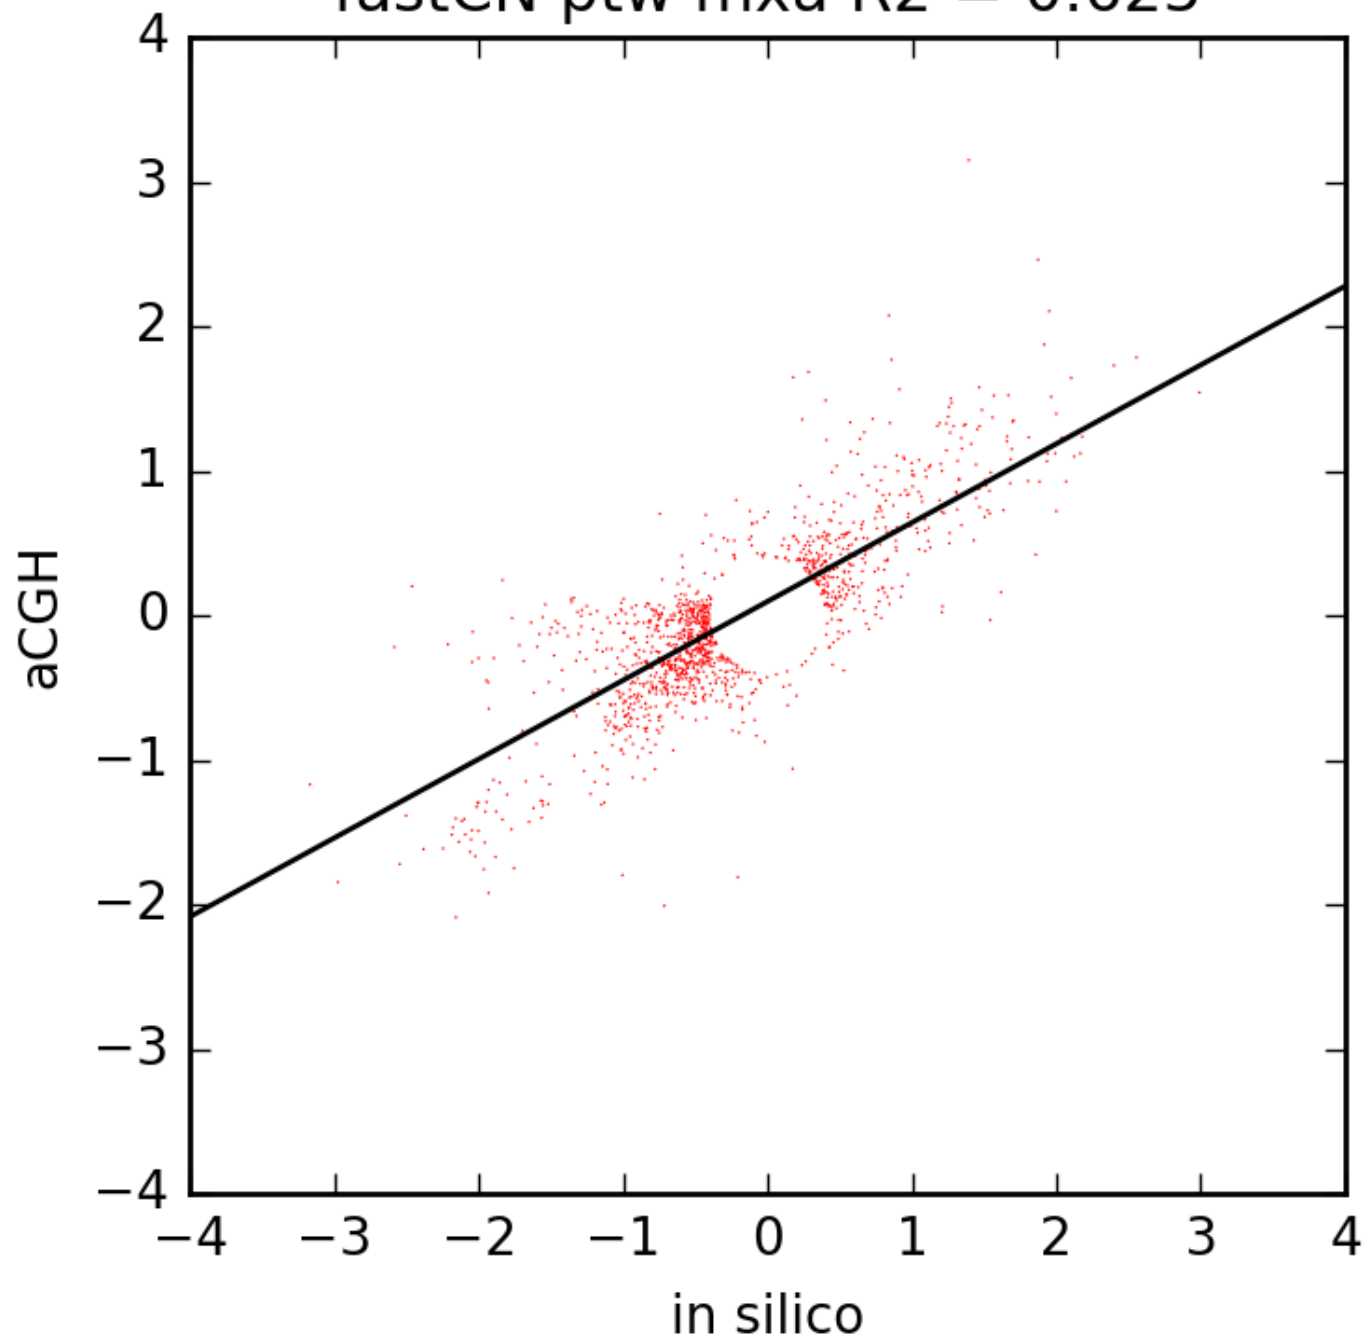

fastCN ysa chw R2 = 0.777

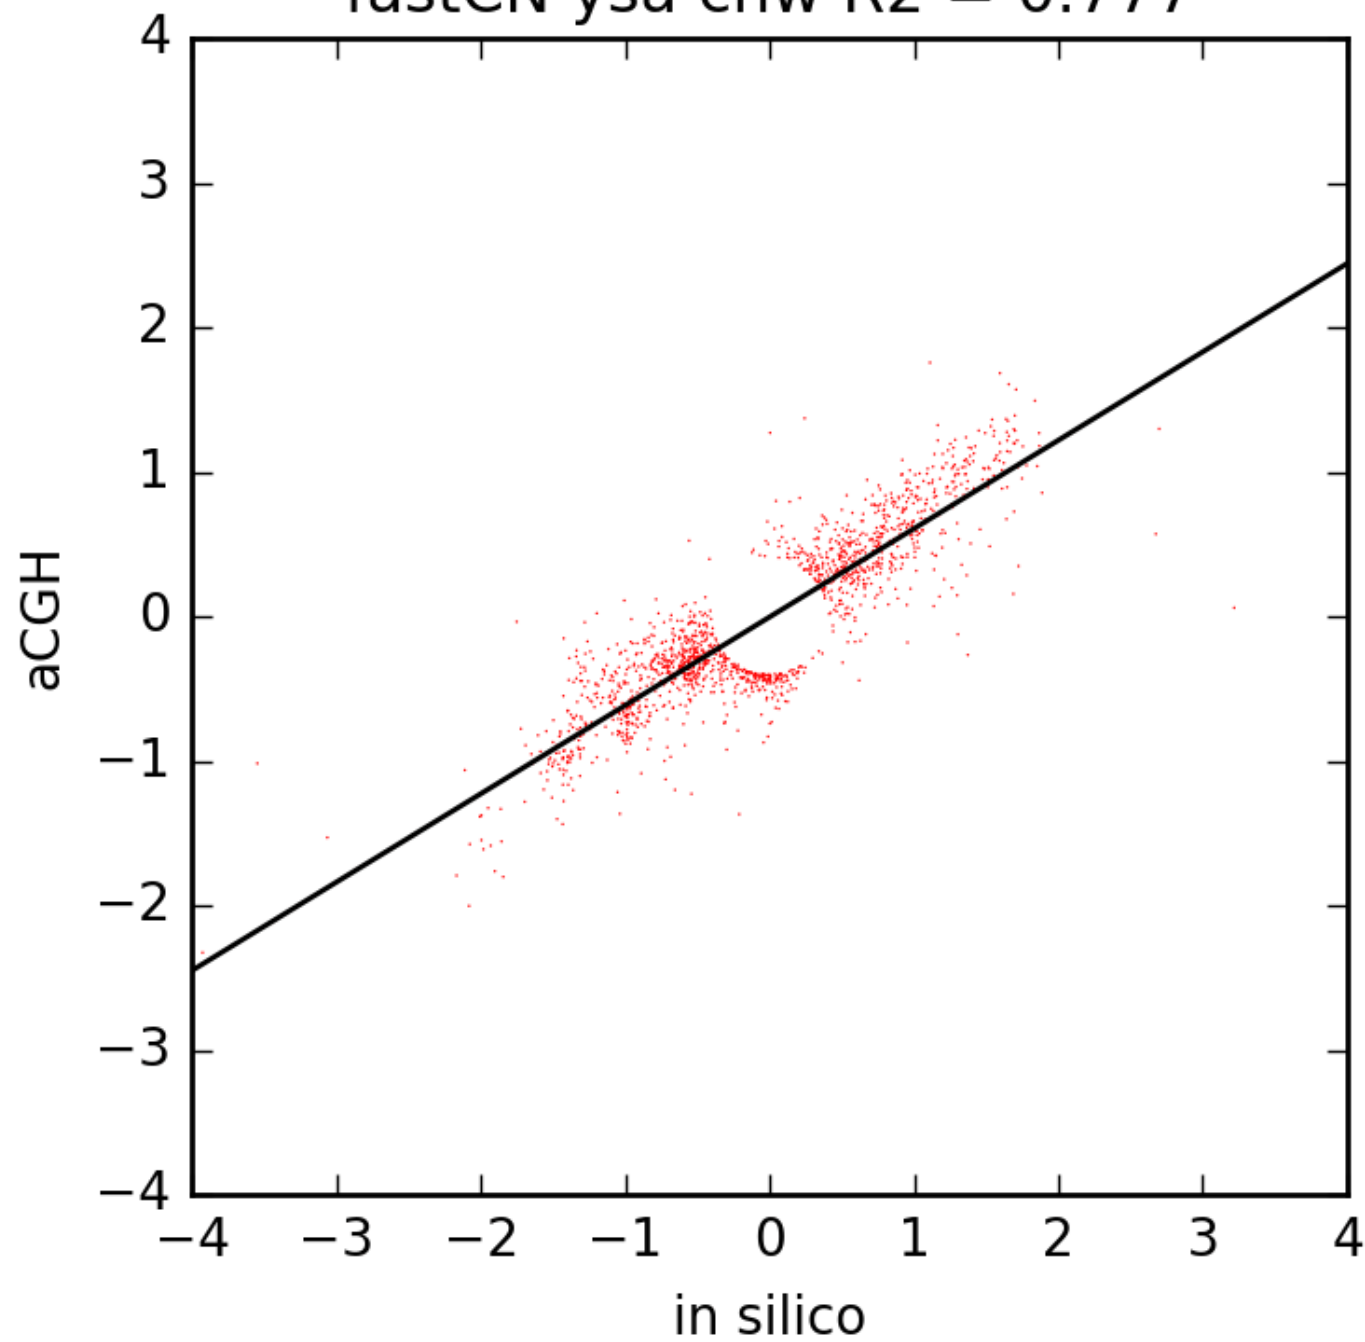



fastCN ysa glw R2 = 0.727

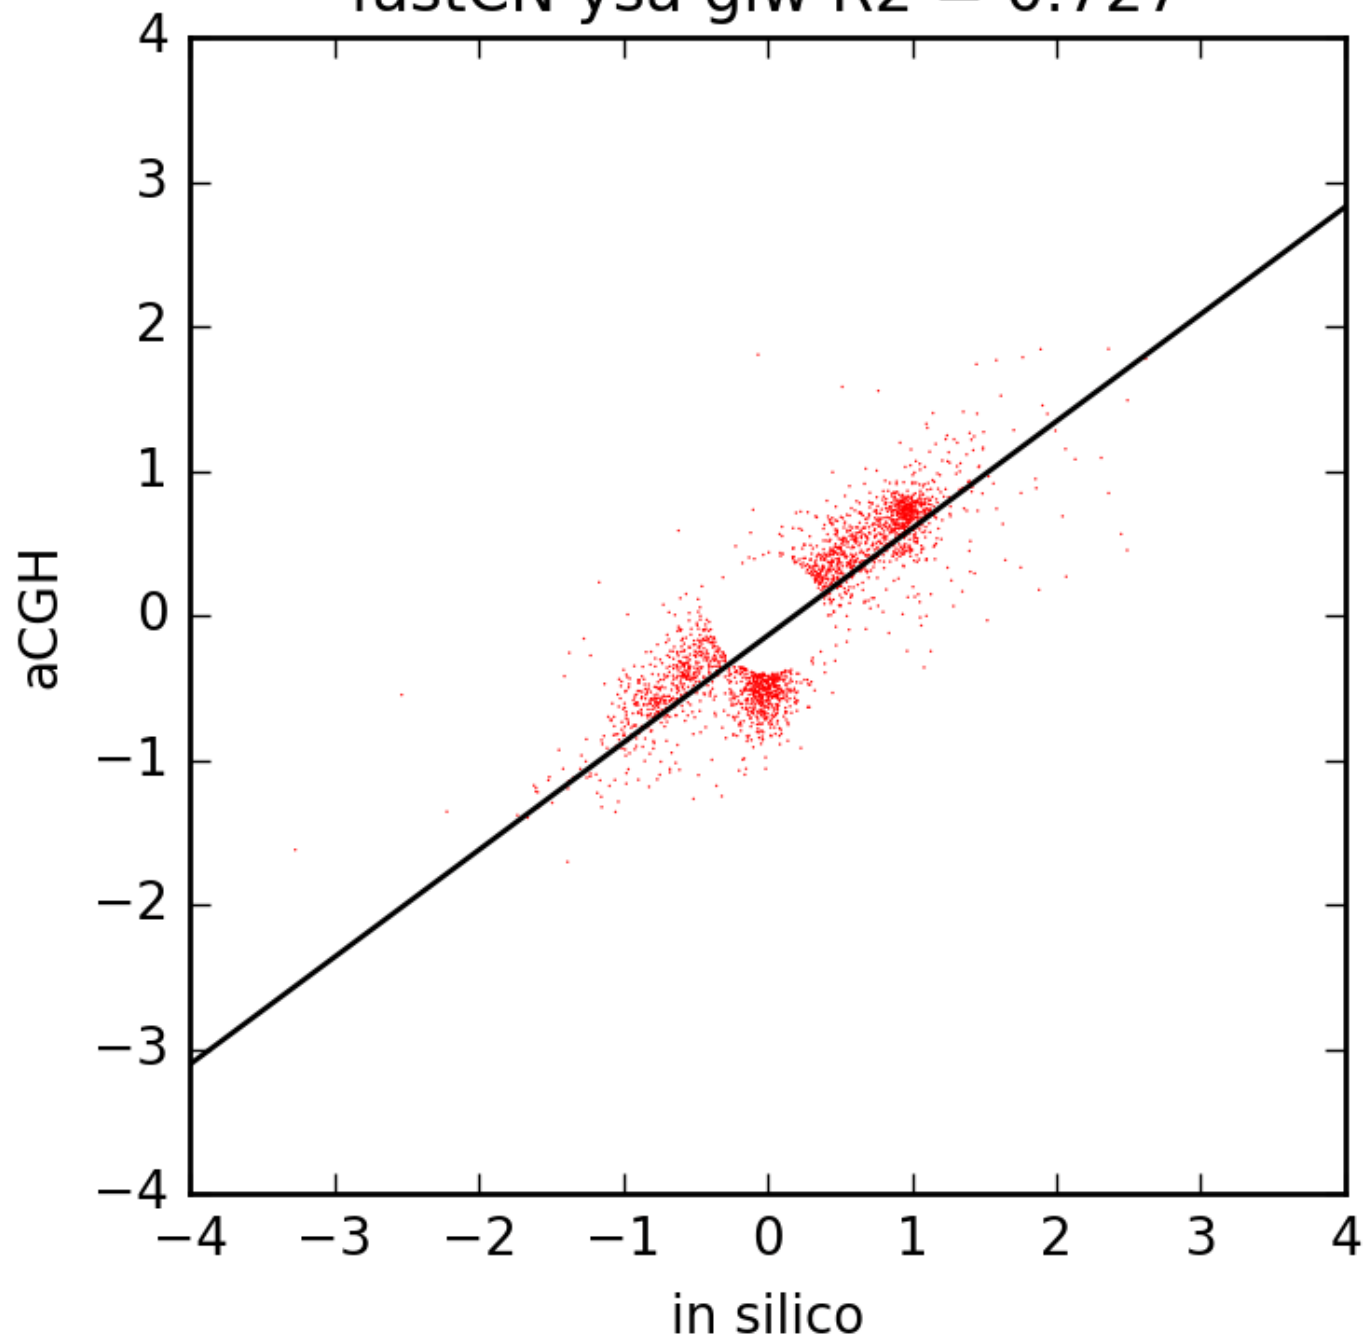

fastCN ysa inw R2 = 0.815

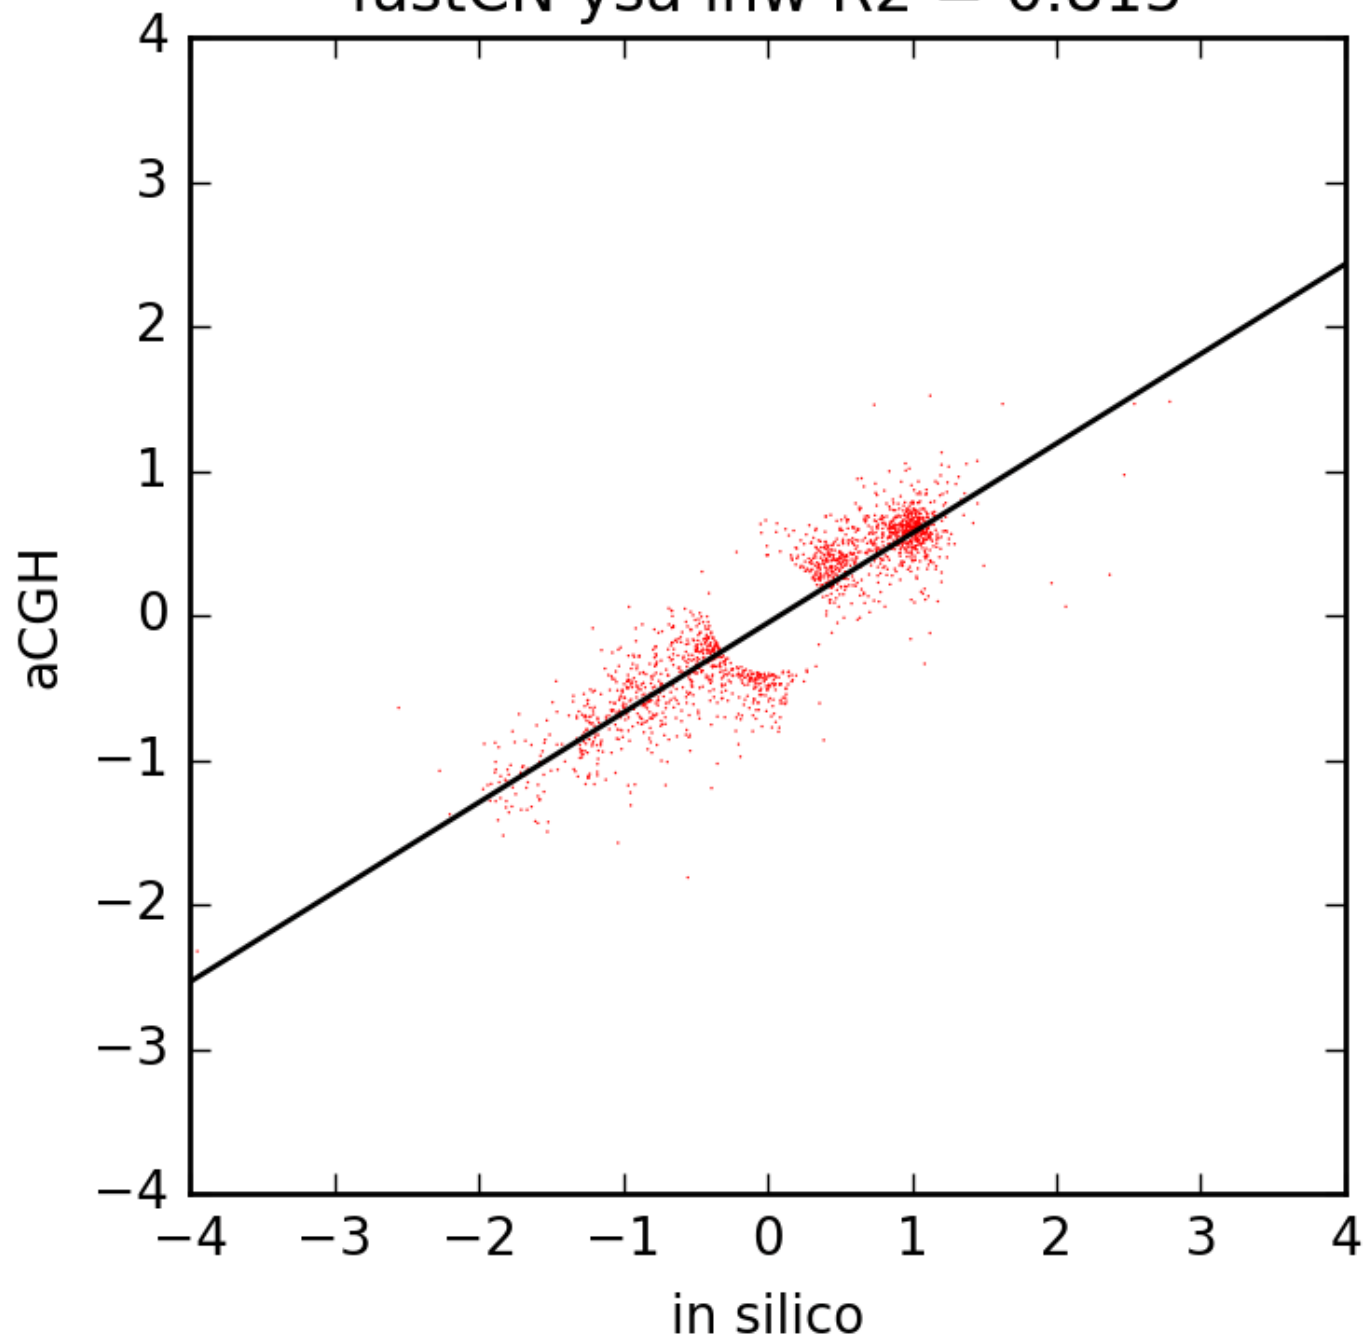

fastCN ysa irw R2 = 0.503

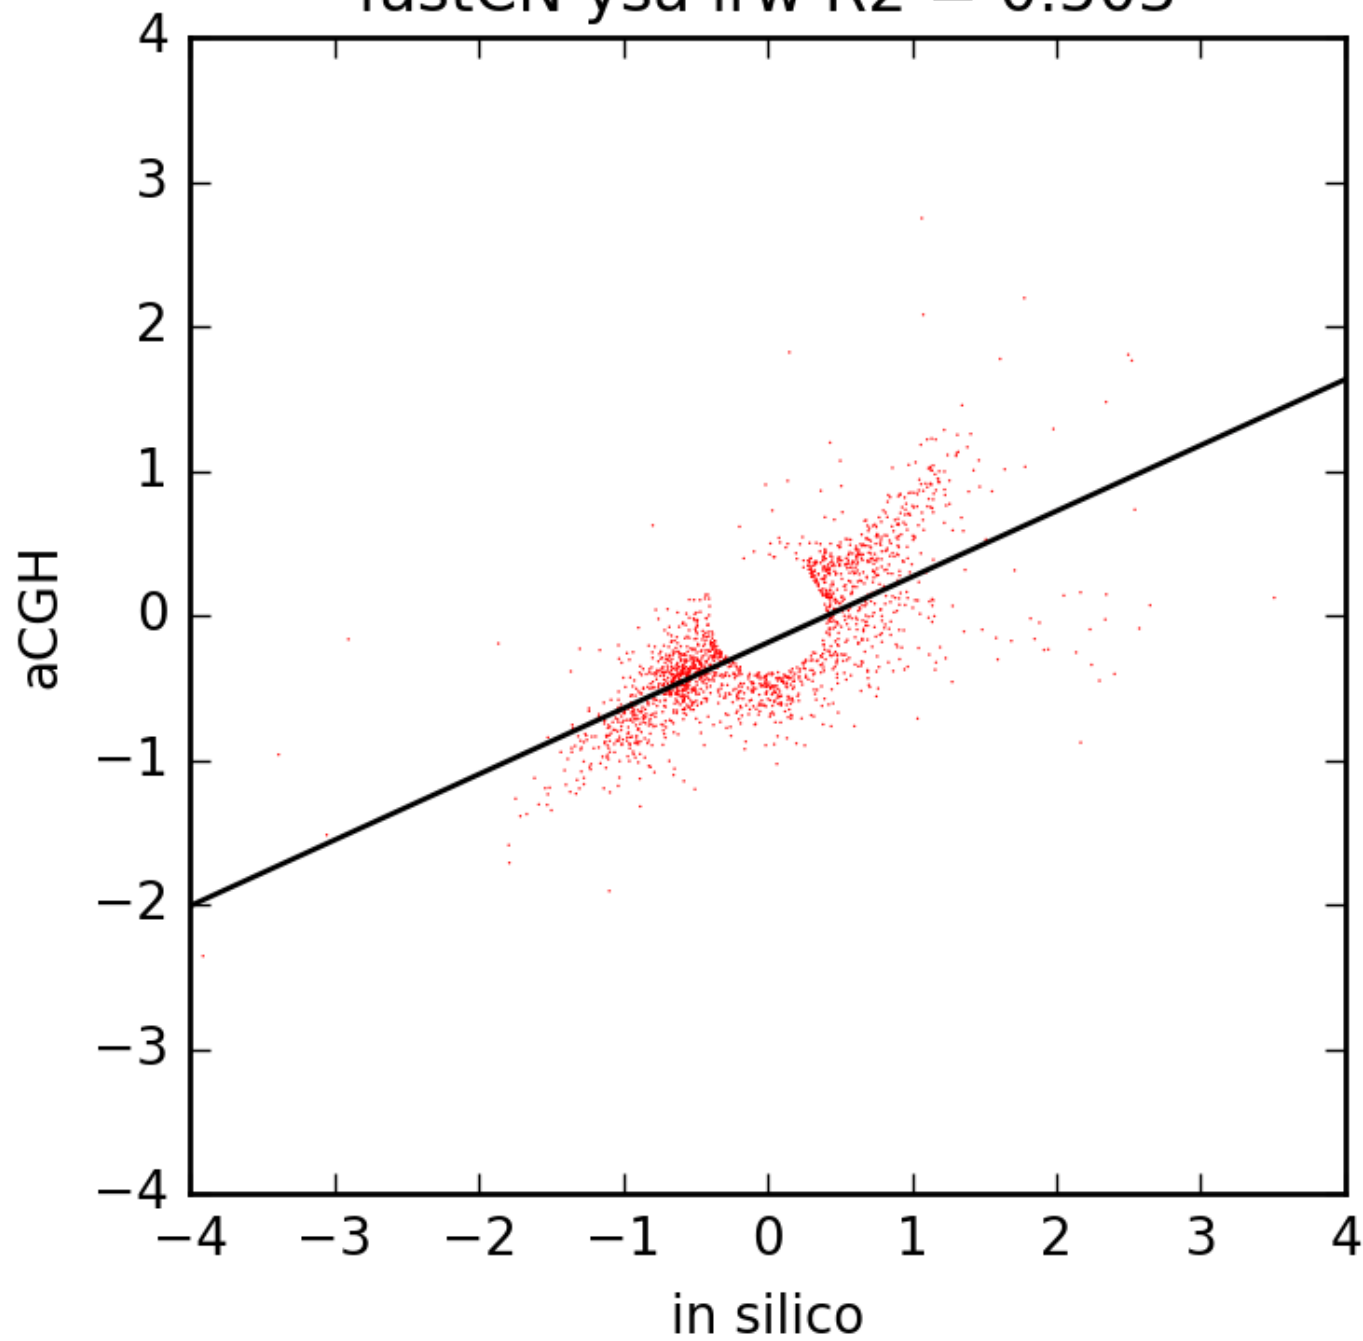

fastCN ysa mxa R2 = 0.649

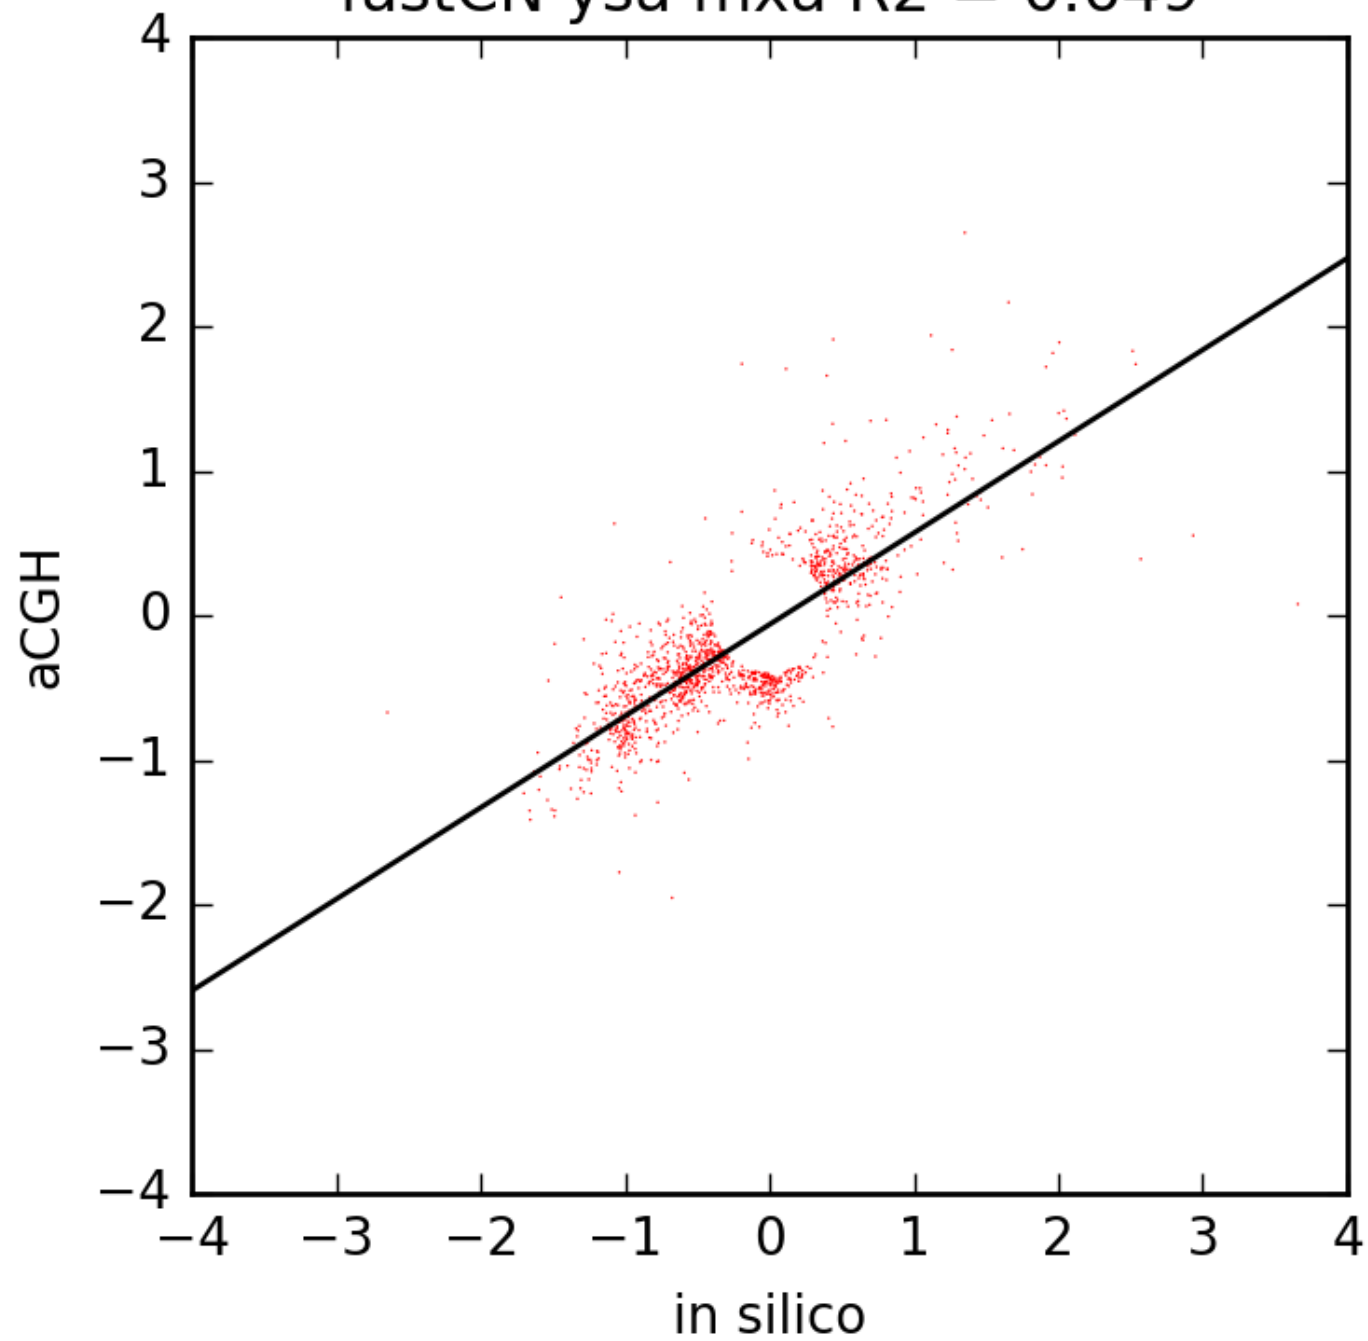

fastCN ysa ptw R2 = 0.627

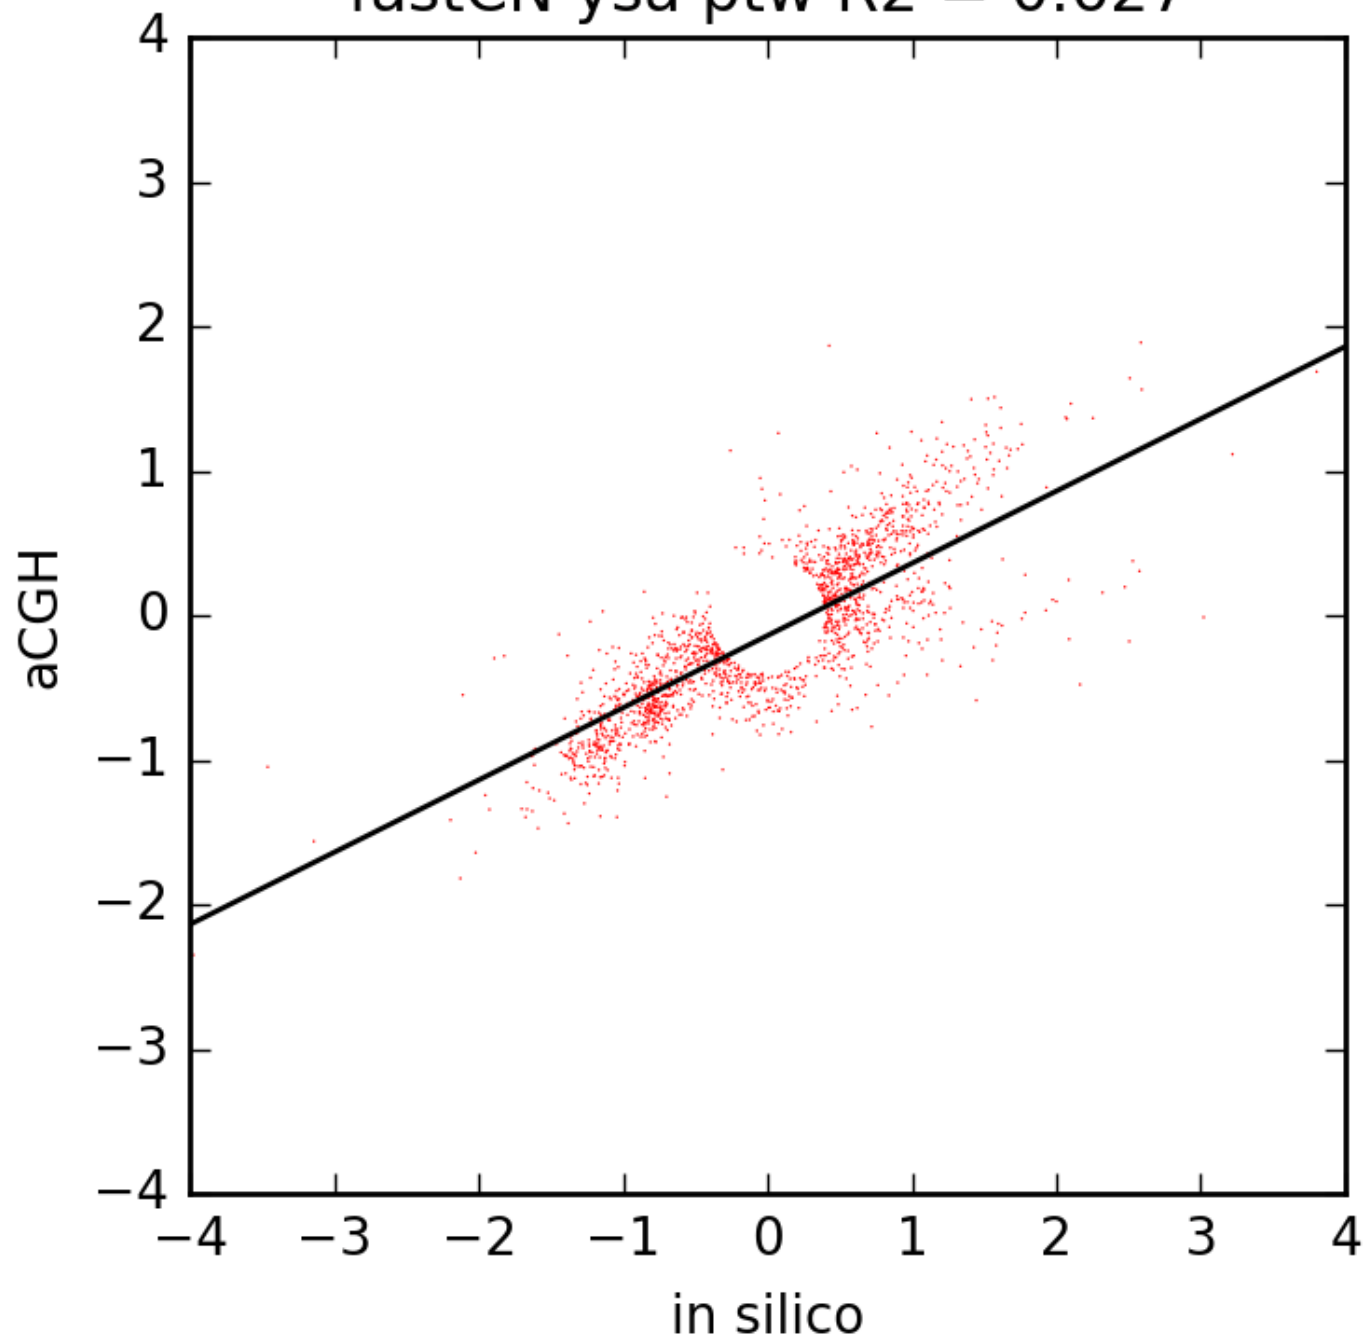

Quick-mer chw glw R2 = 0.63

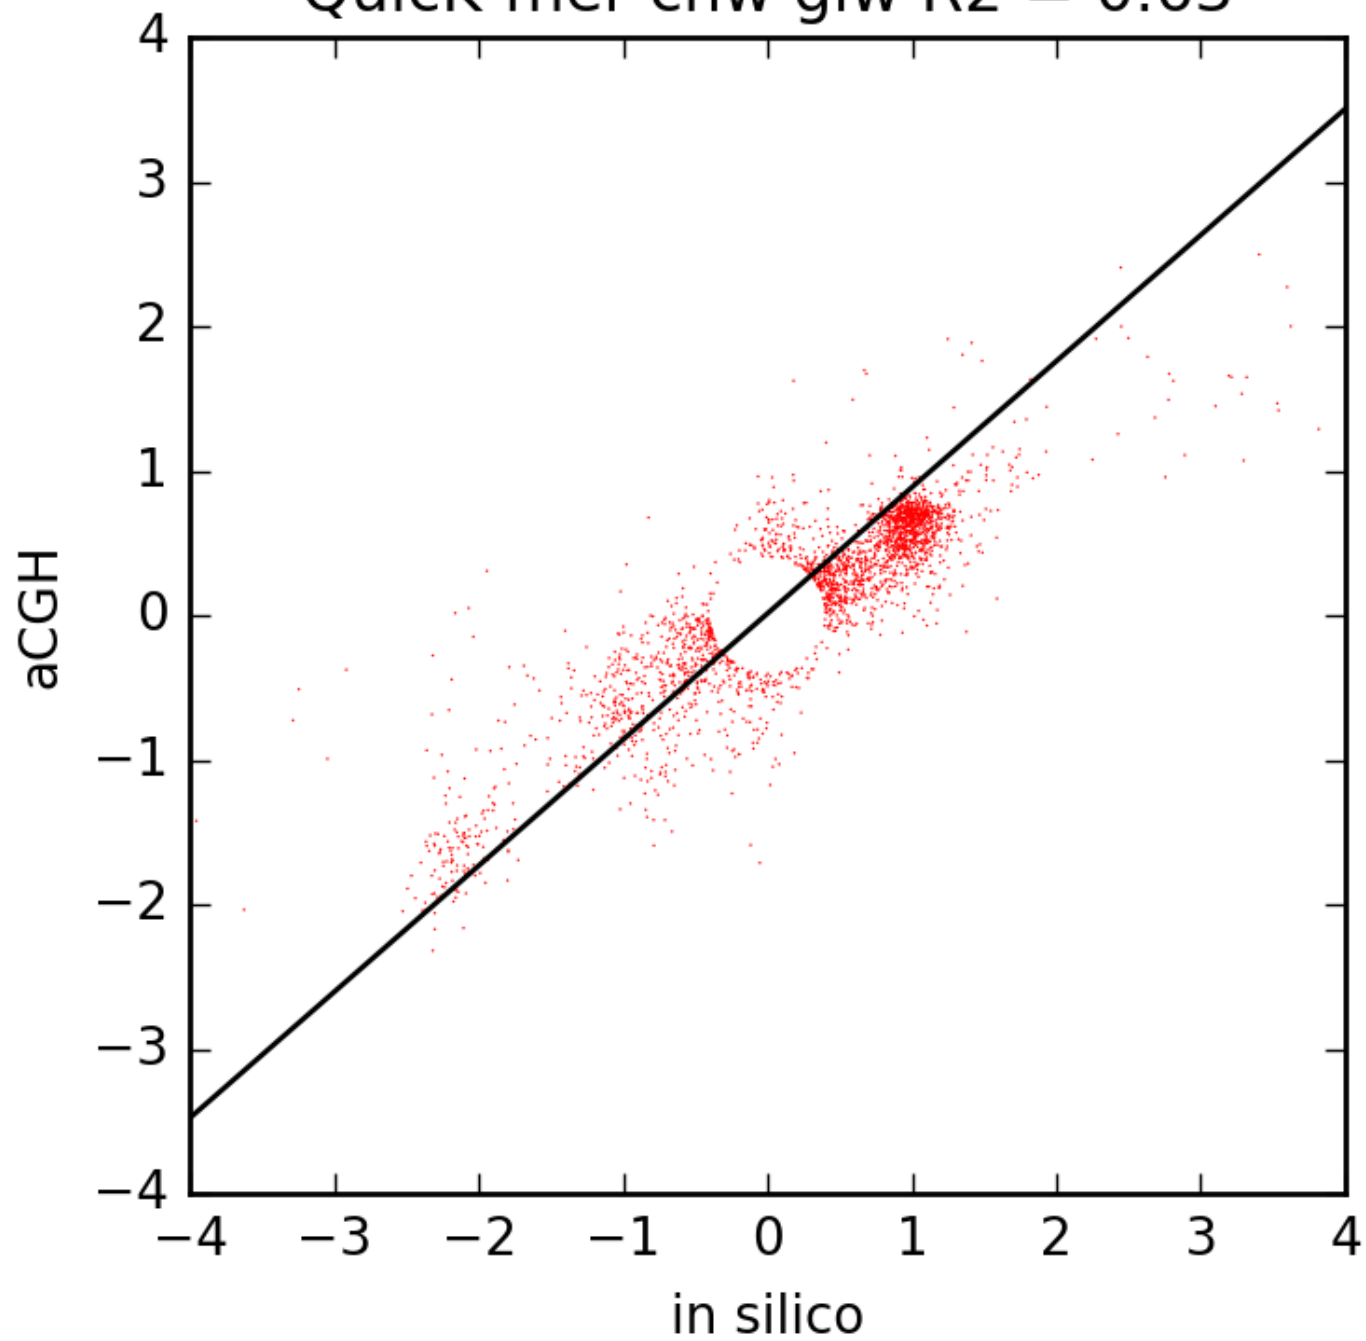

Quick-mer chw mxa R2 = 0.598

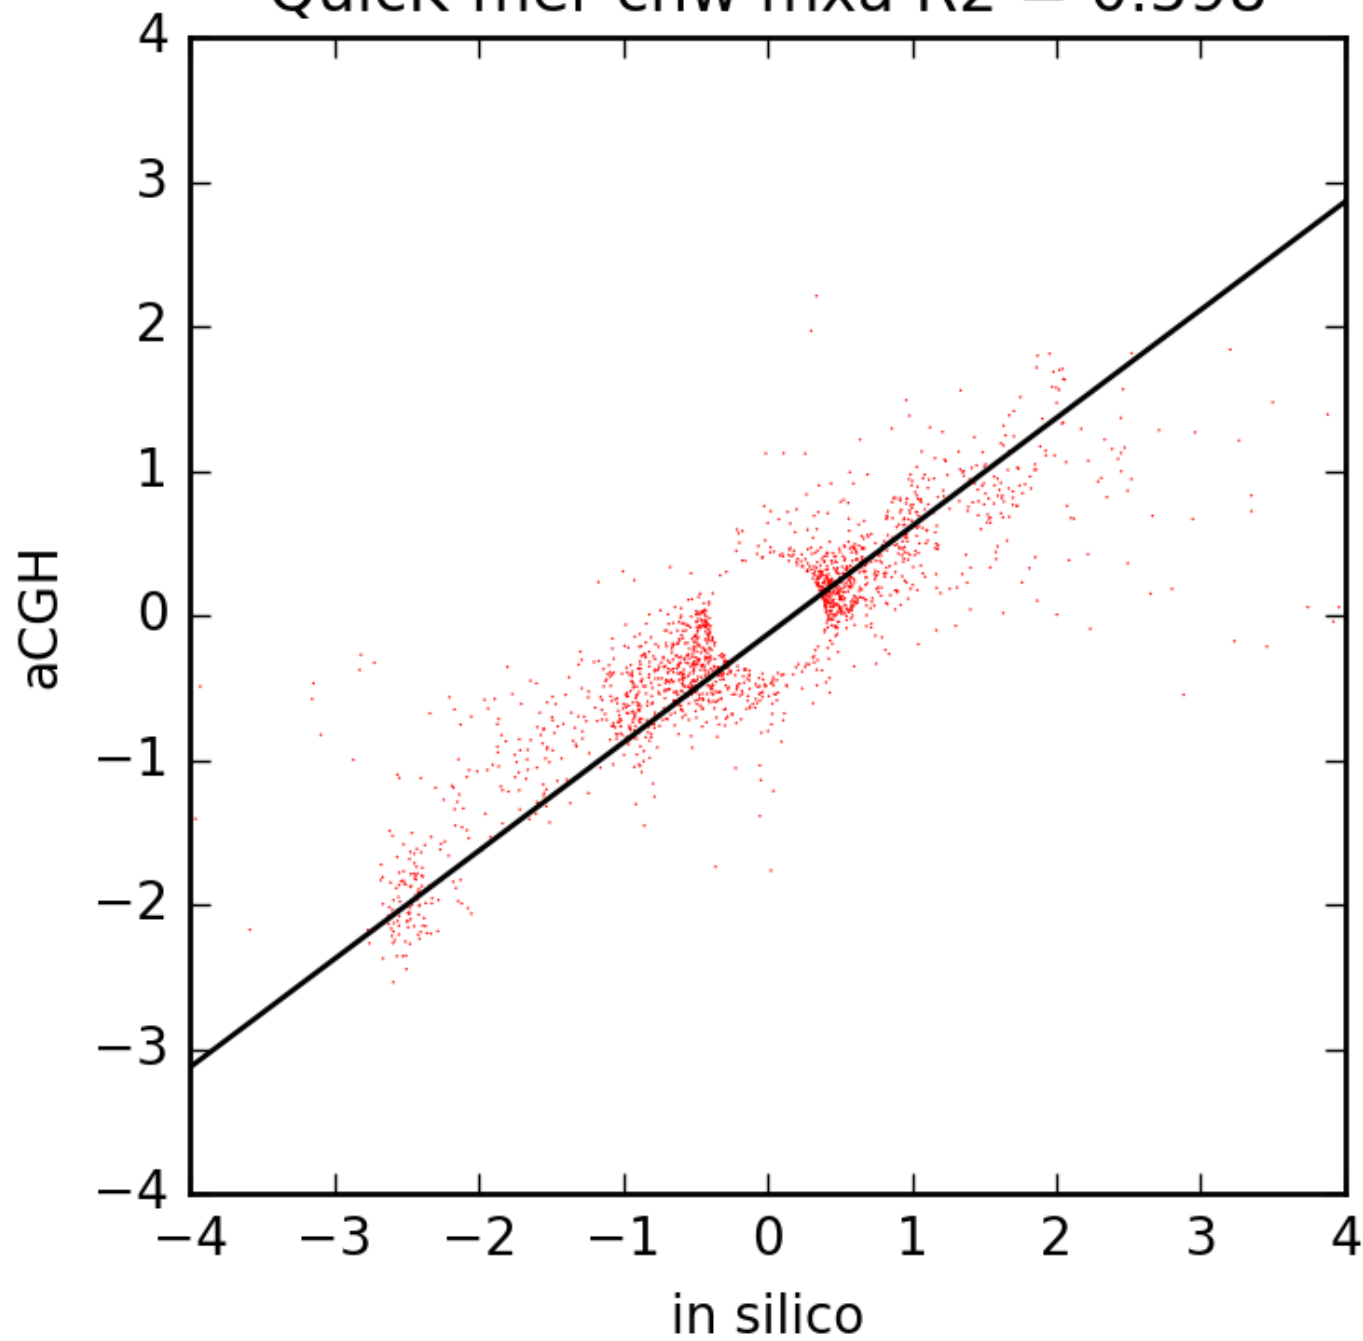

Quick-mer chw ptw R2 = 0.575

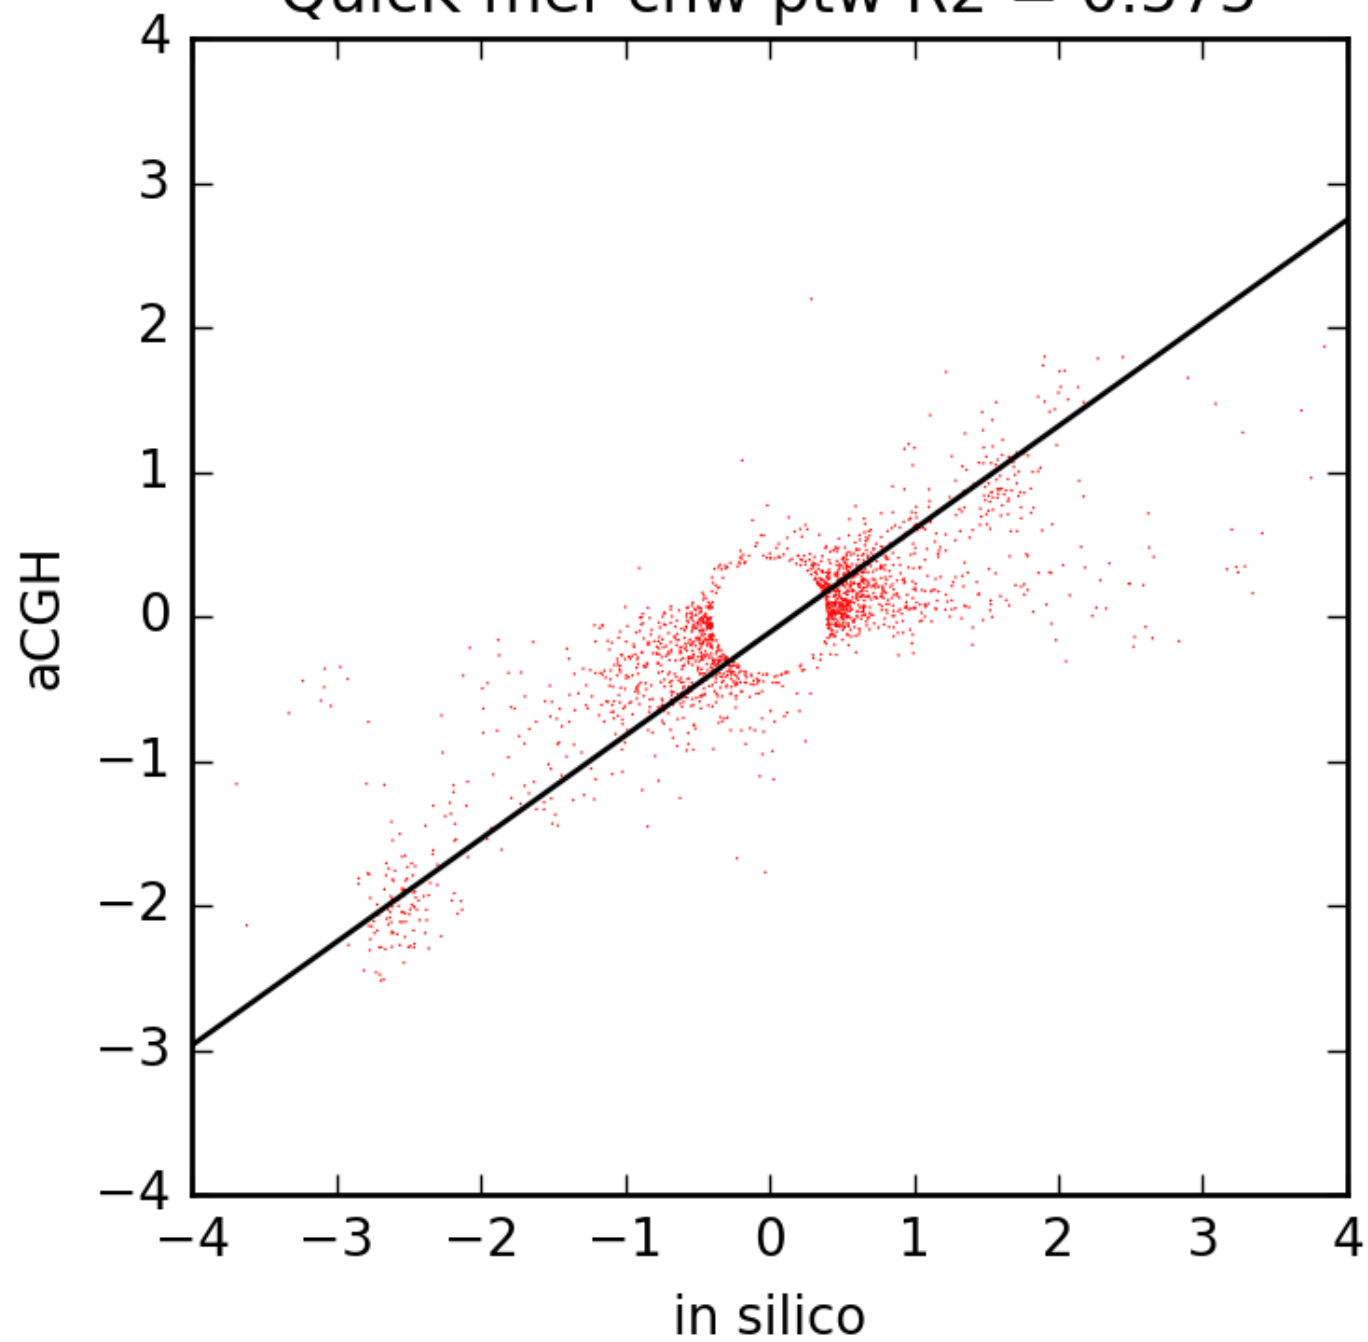



QuickK-mer inw chw R2 = 0.736

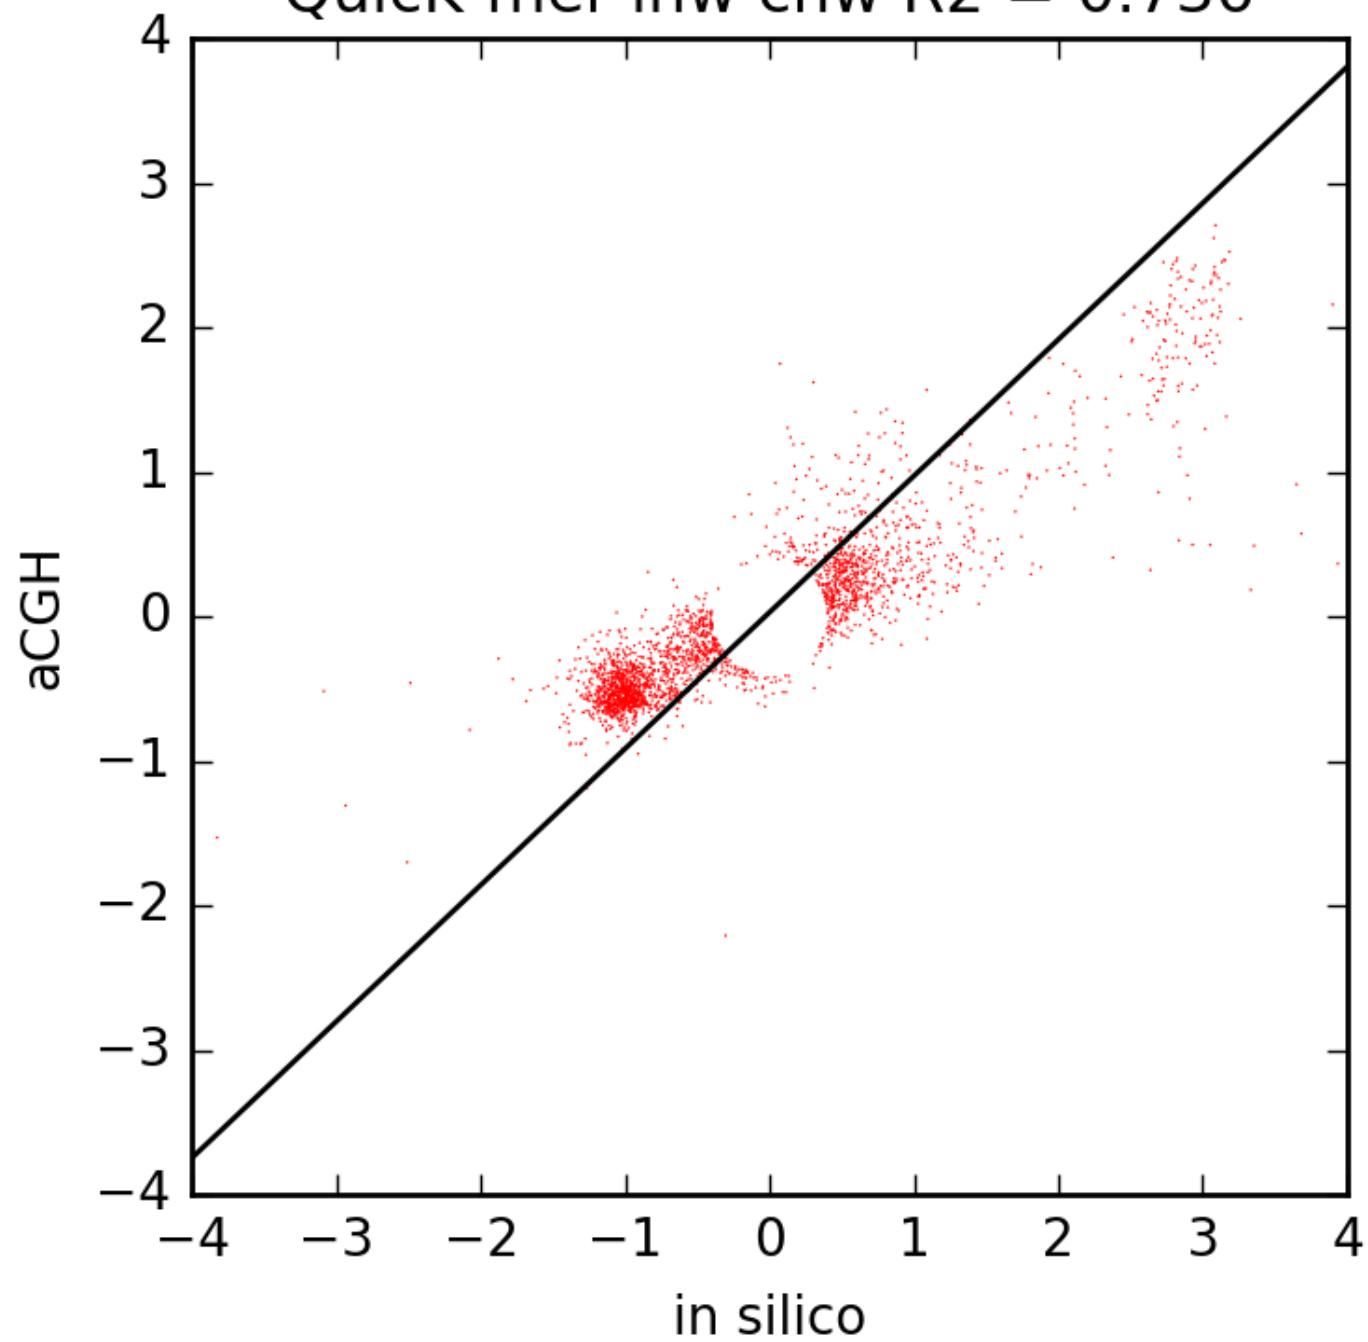

Quick-mer inw glw R2 = 0.48

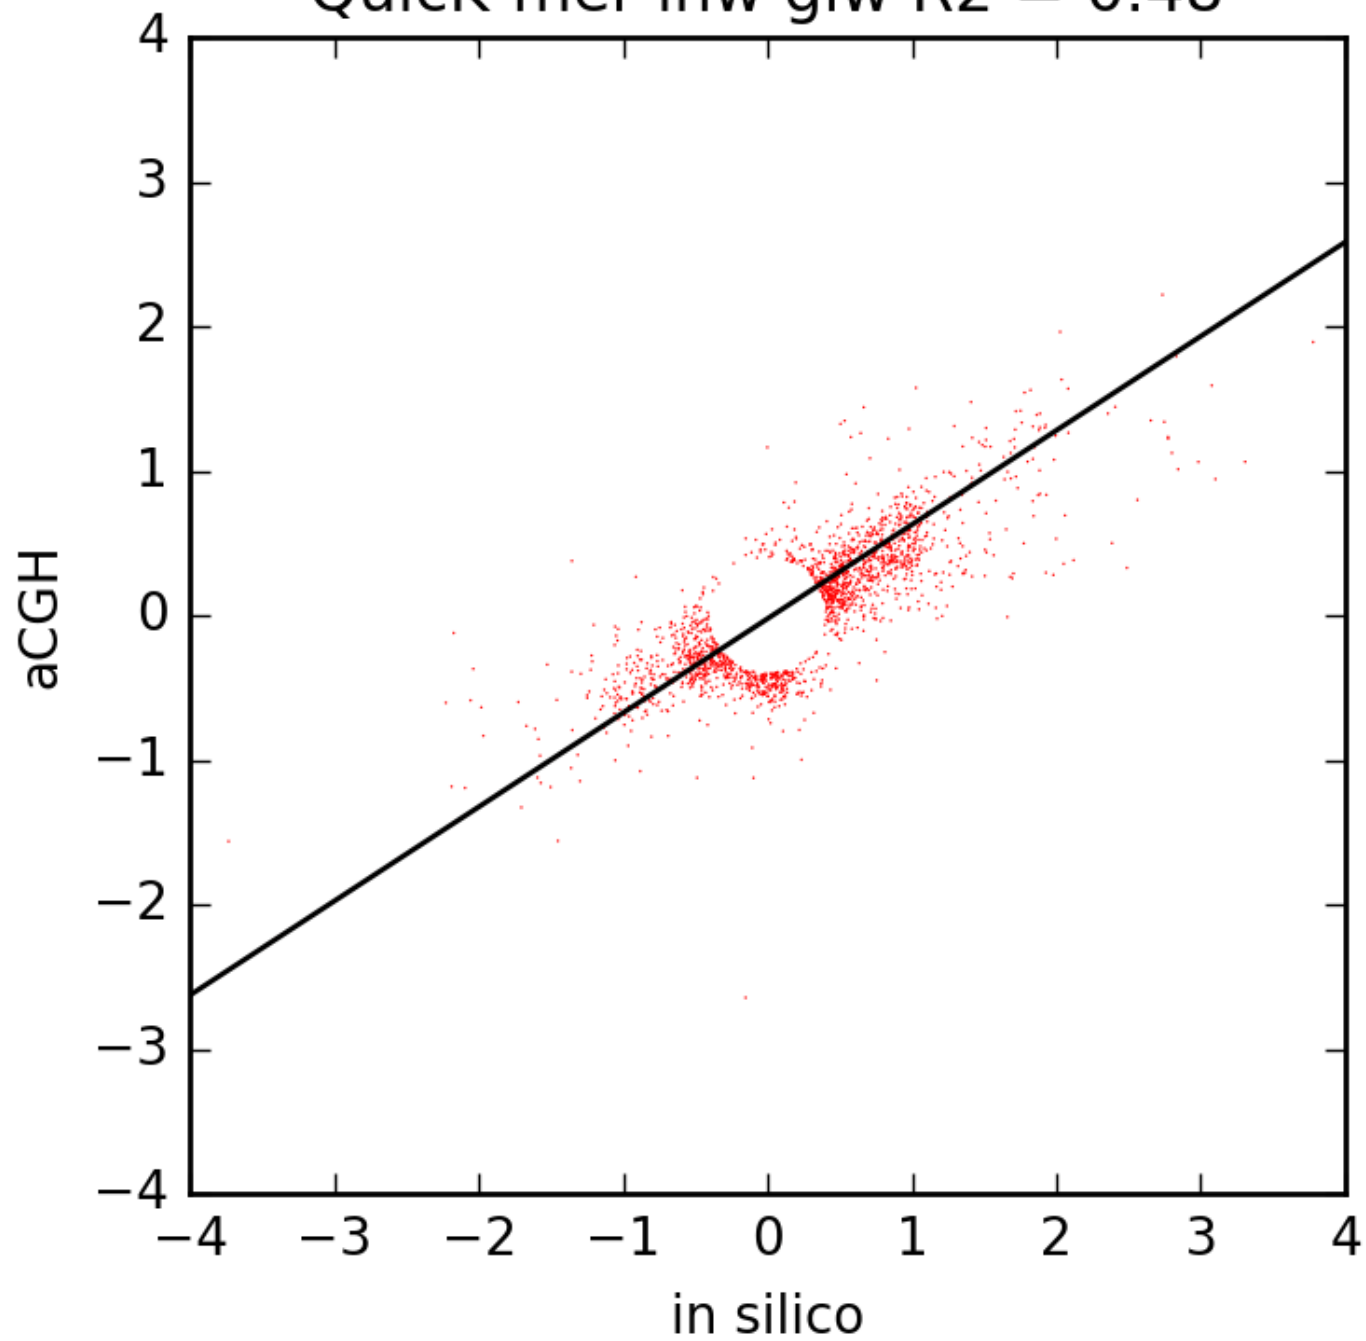

Quick-mer inw irw R2 = 0.566

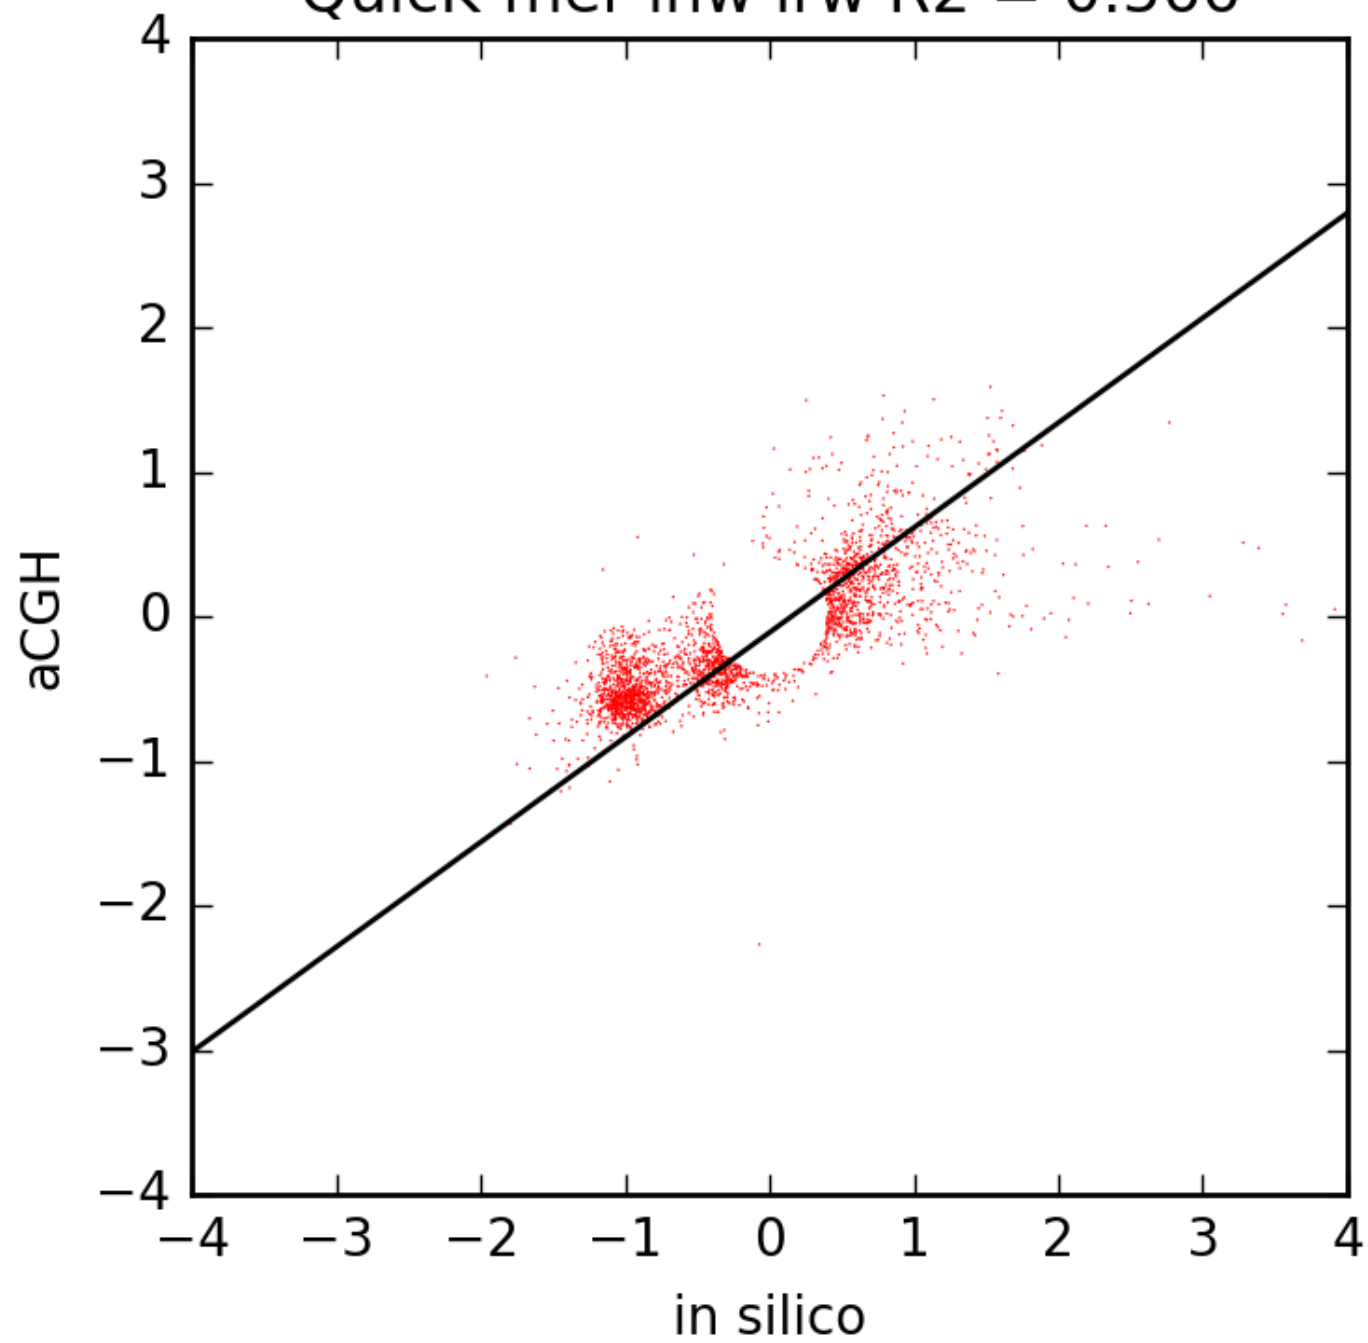

Quick-mer inw mxa R2 = 0.552

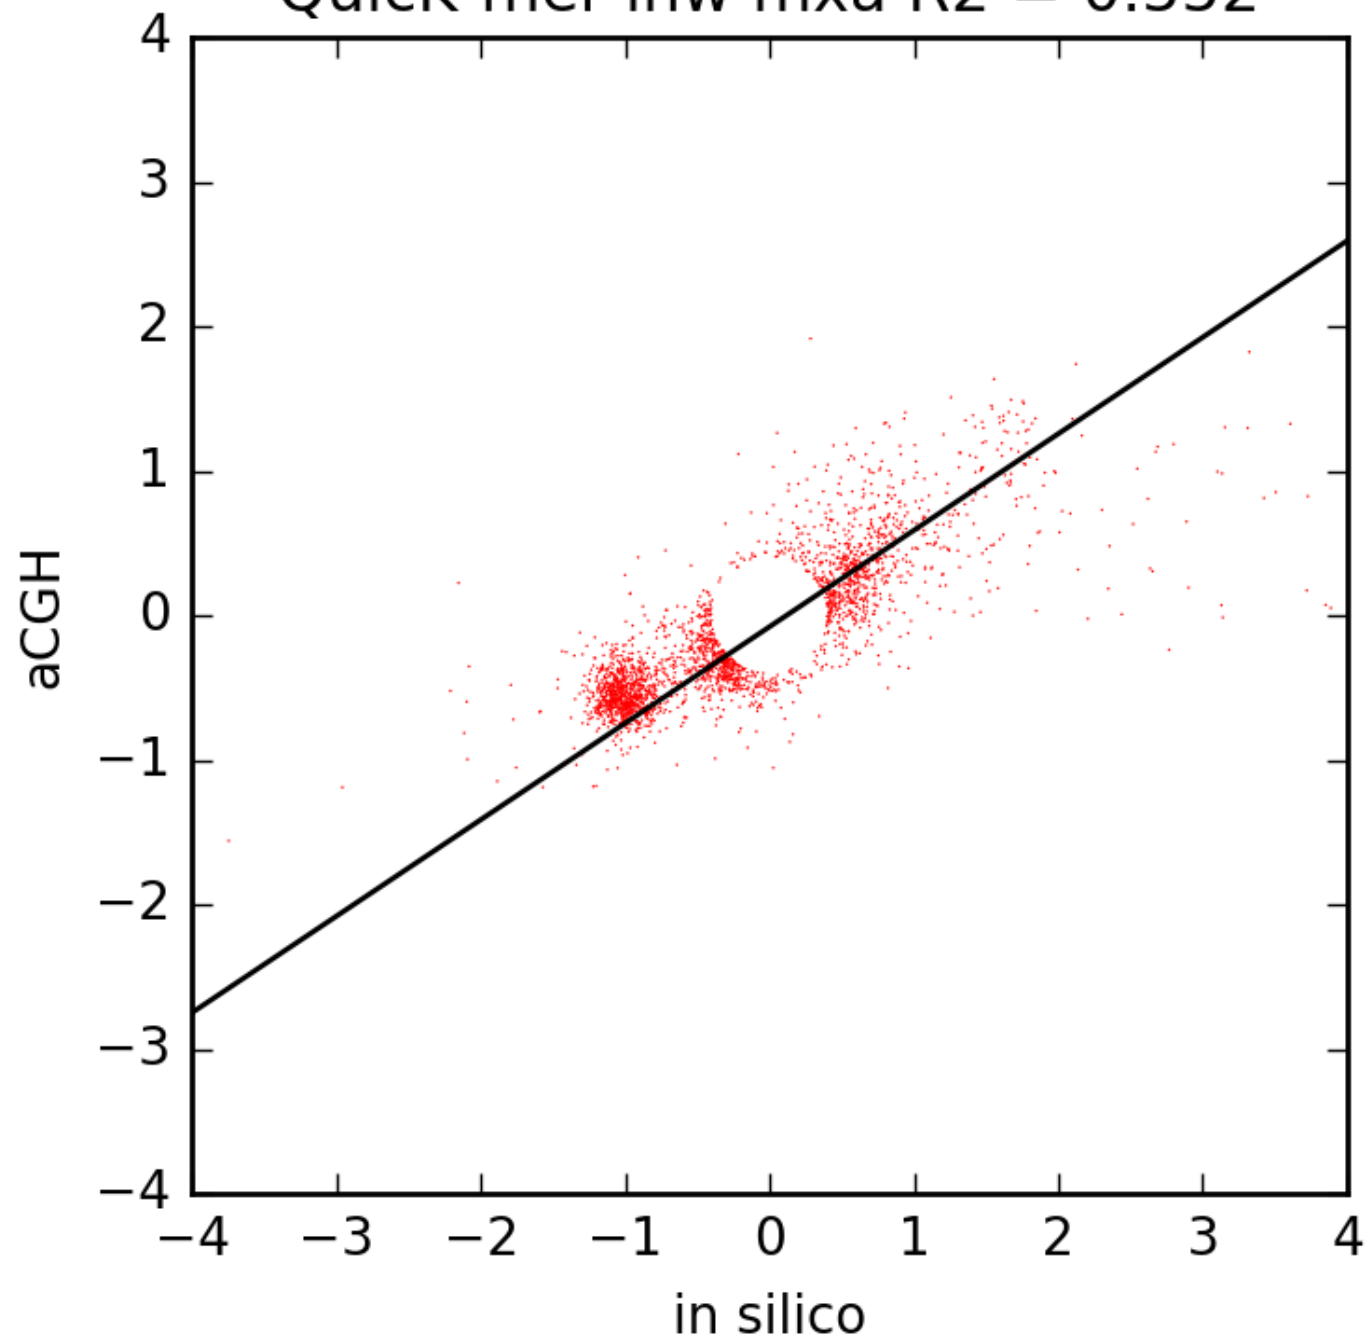

QuickK-mer inw ptw R2 = 0.592

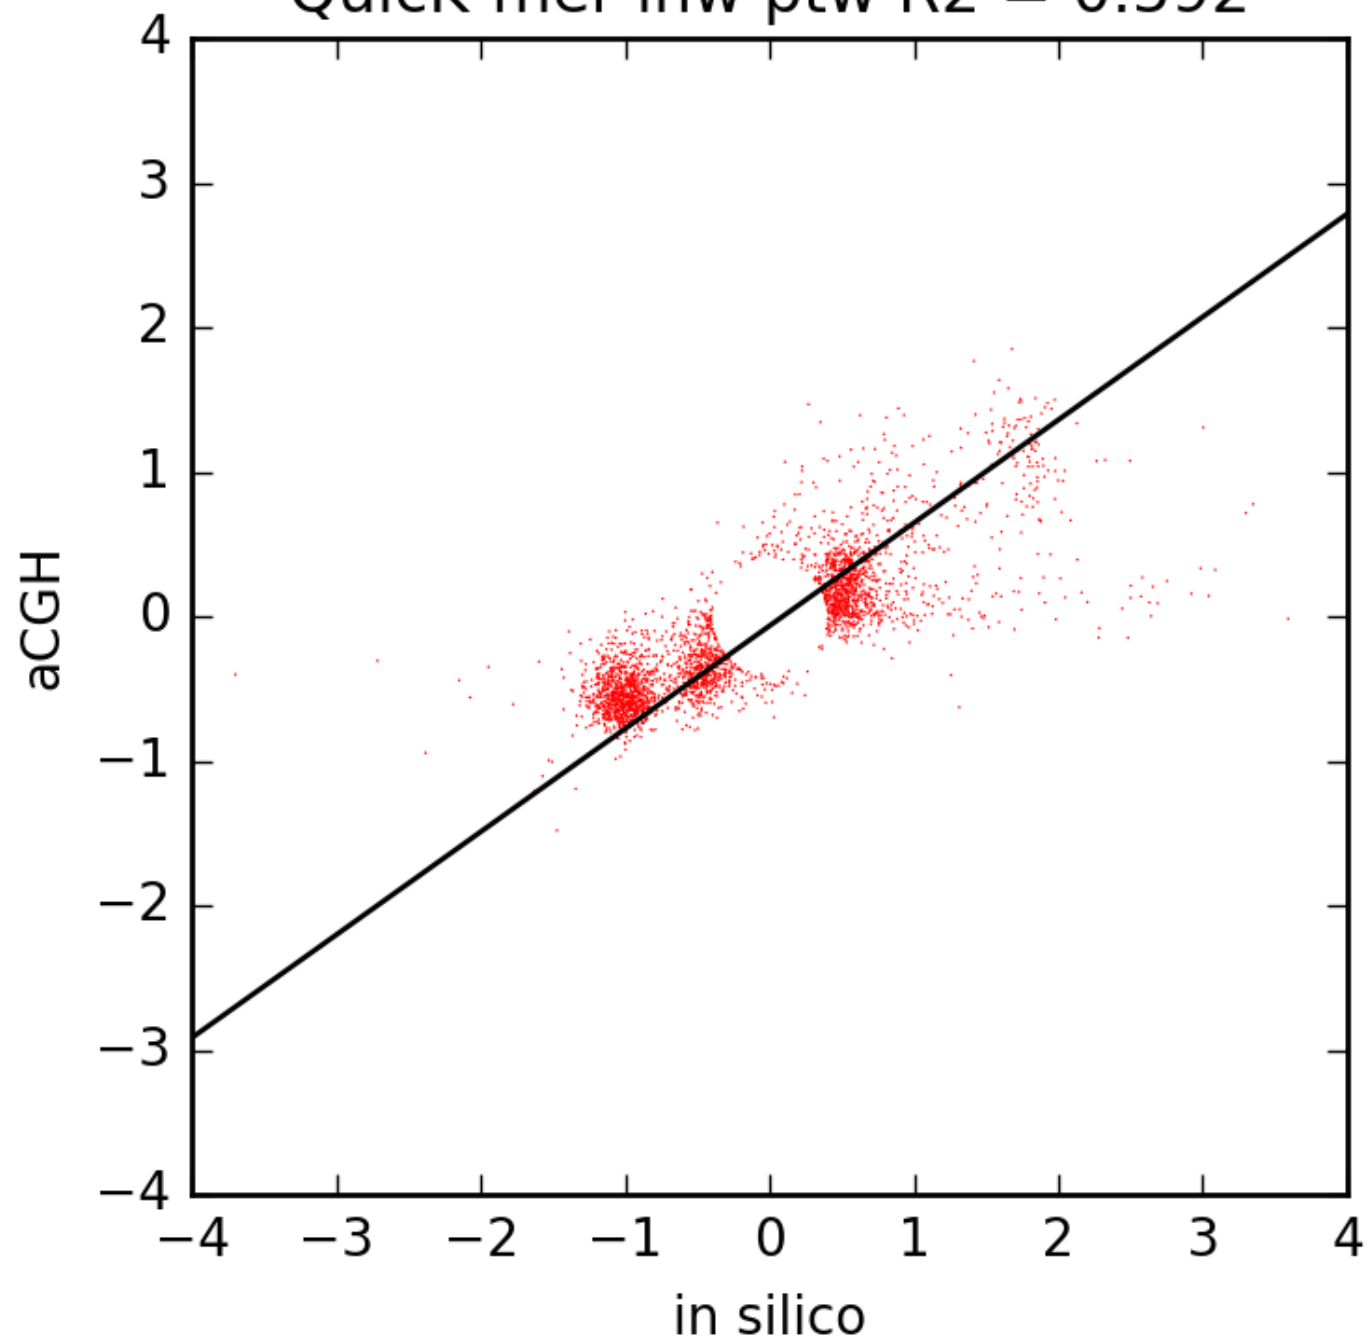

Quick-mer irw chw R2 = 0.581

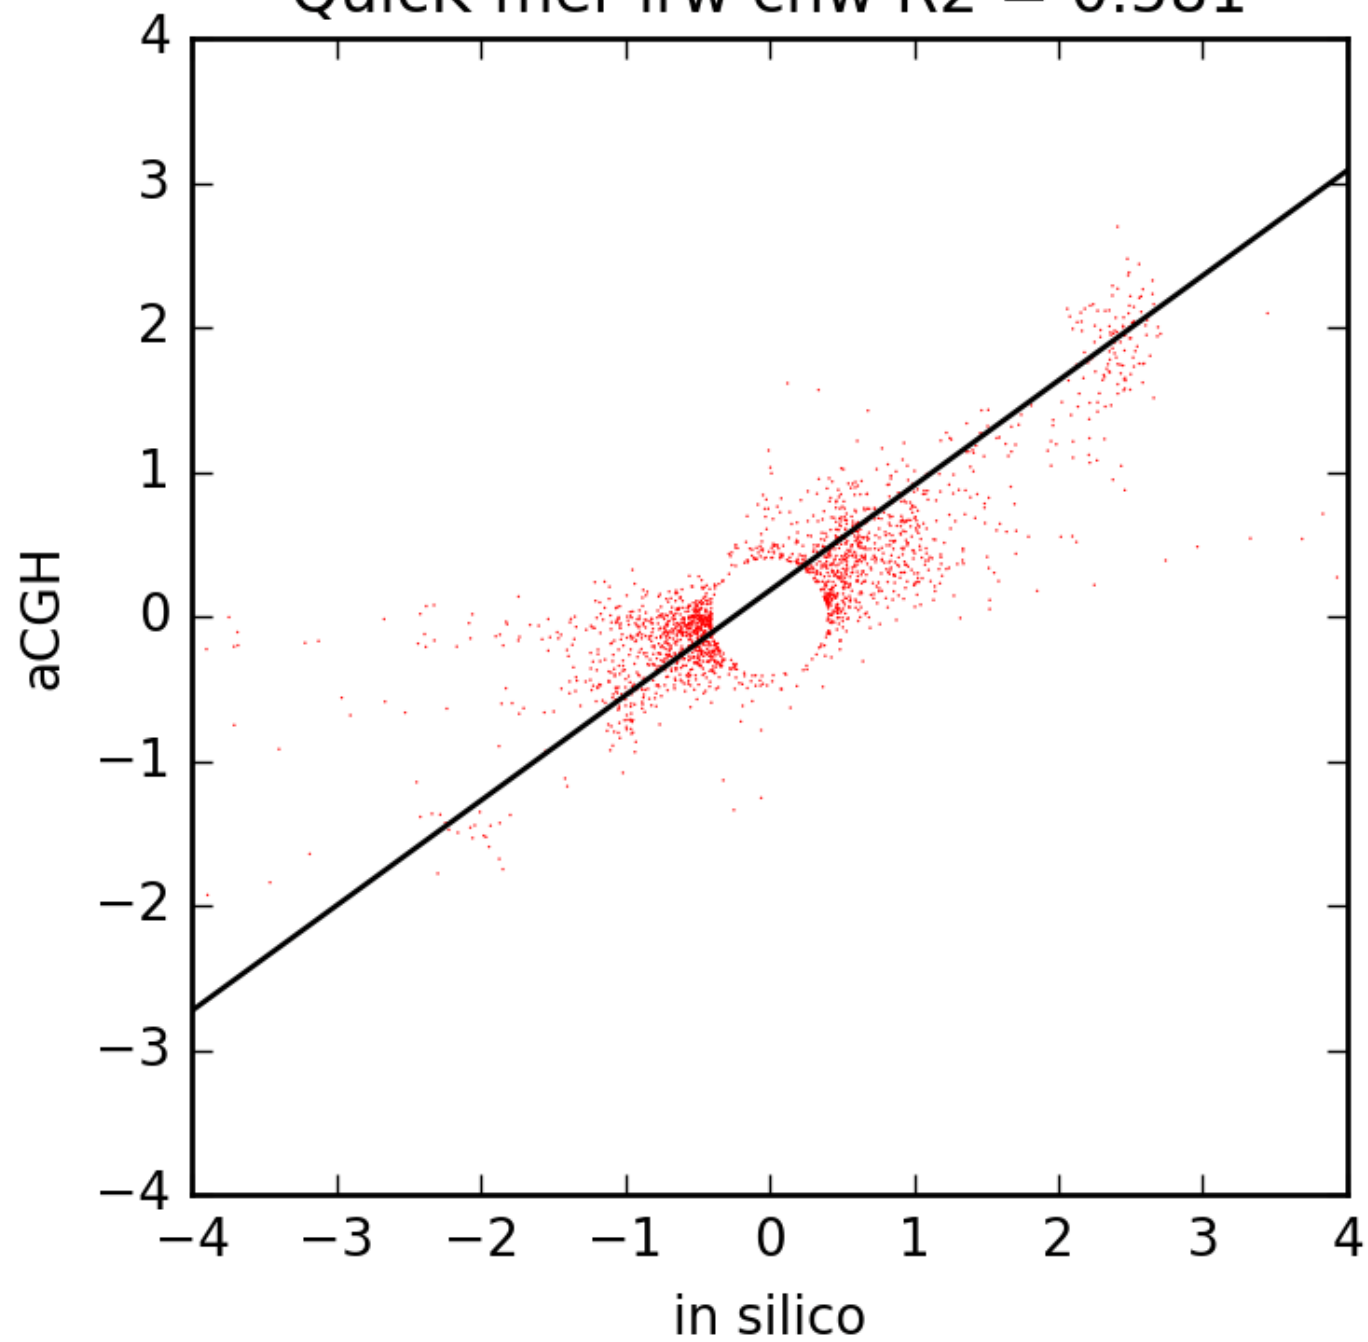

Quick-mer irw glw R2 = 0.56

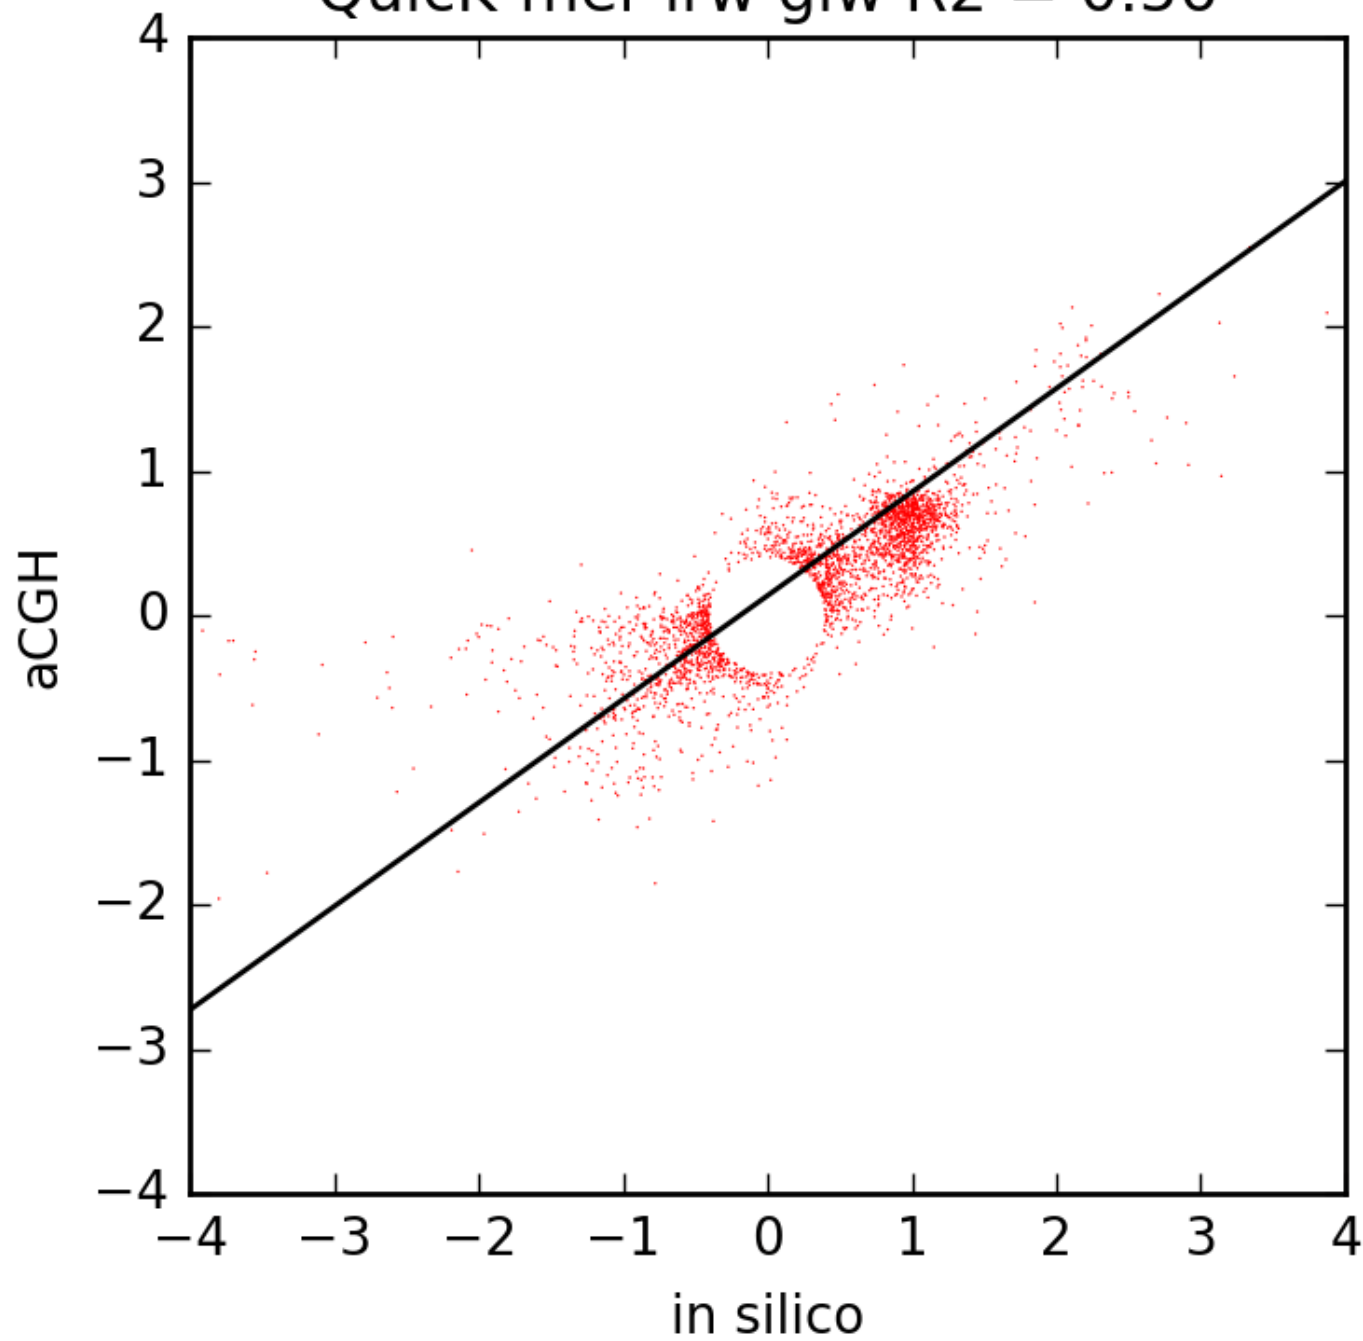

Quick-mer irw mxa R2 = 0.488

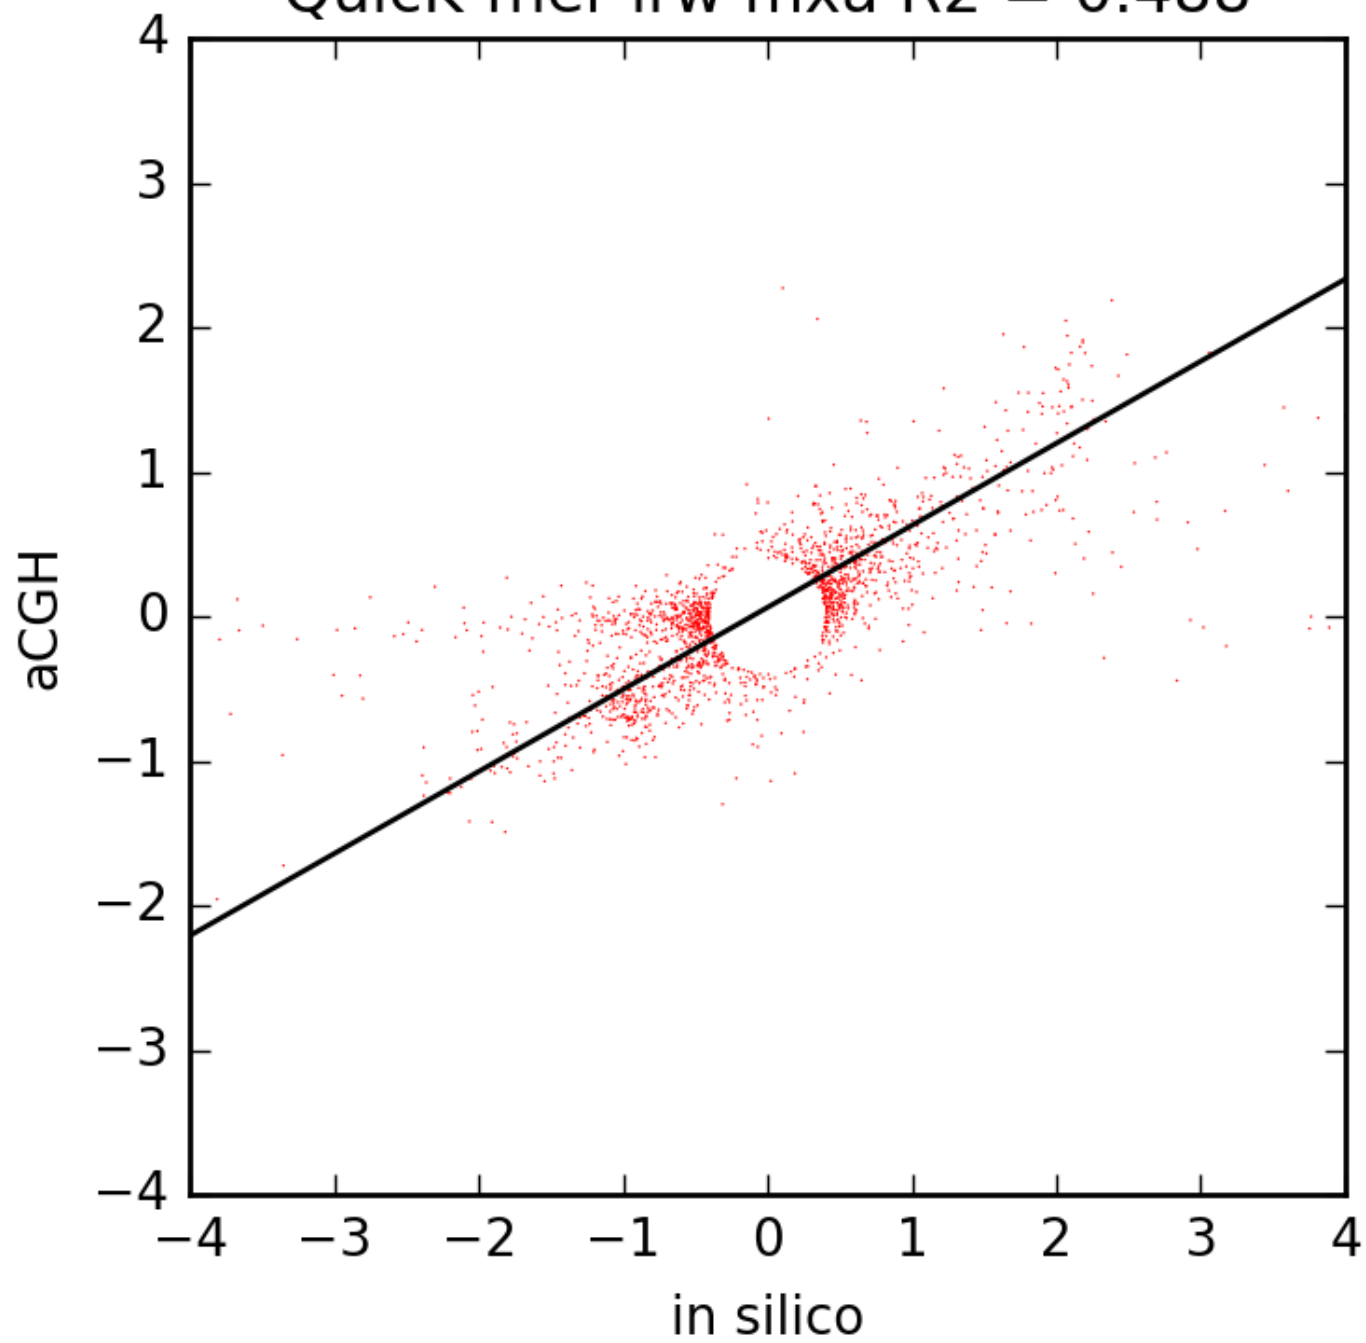



Quick-mer irw ptw R2 = 0.559

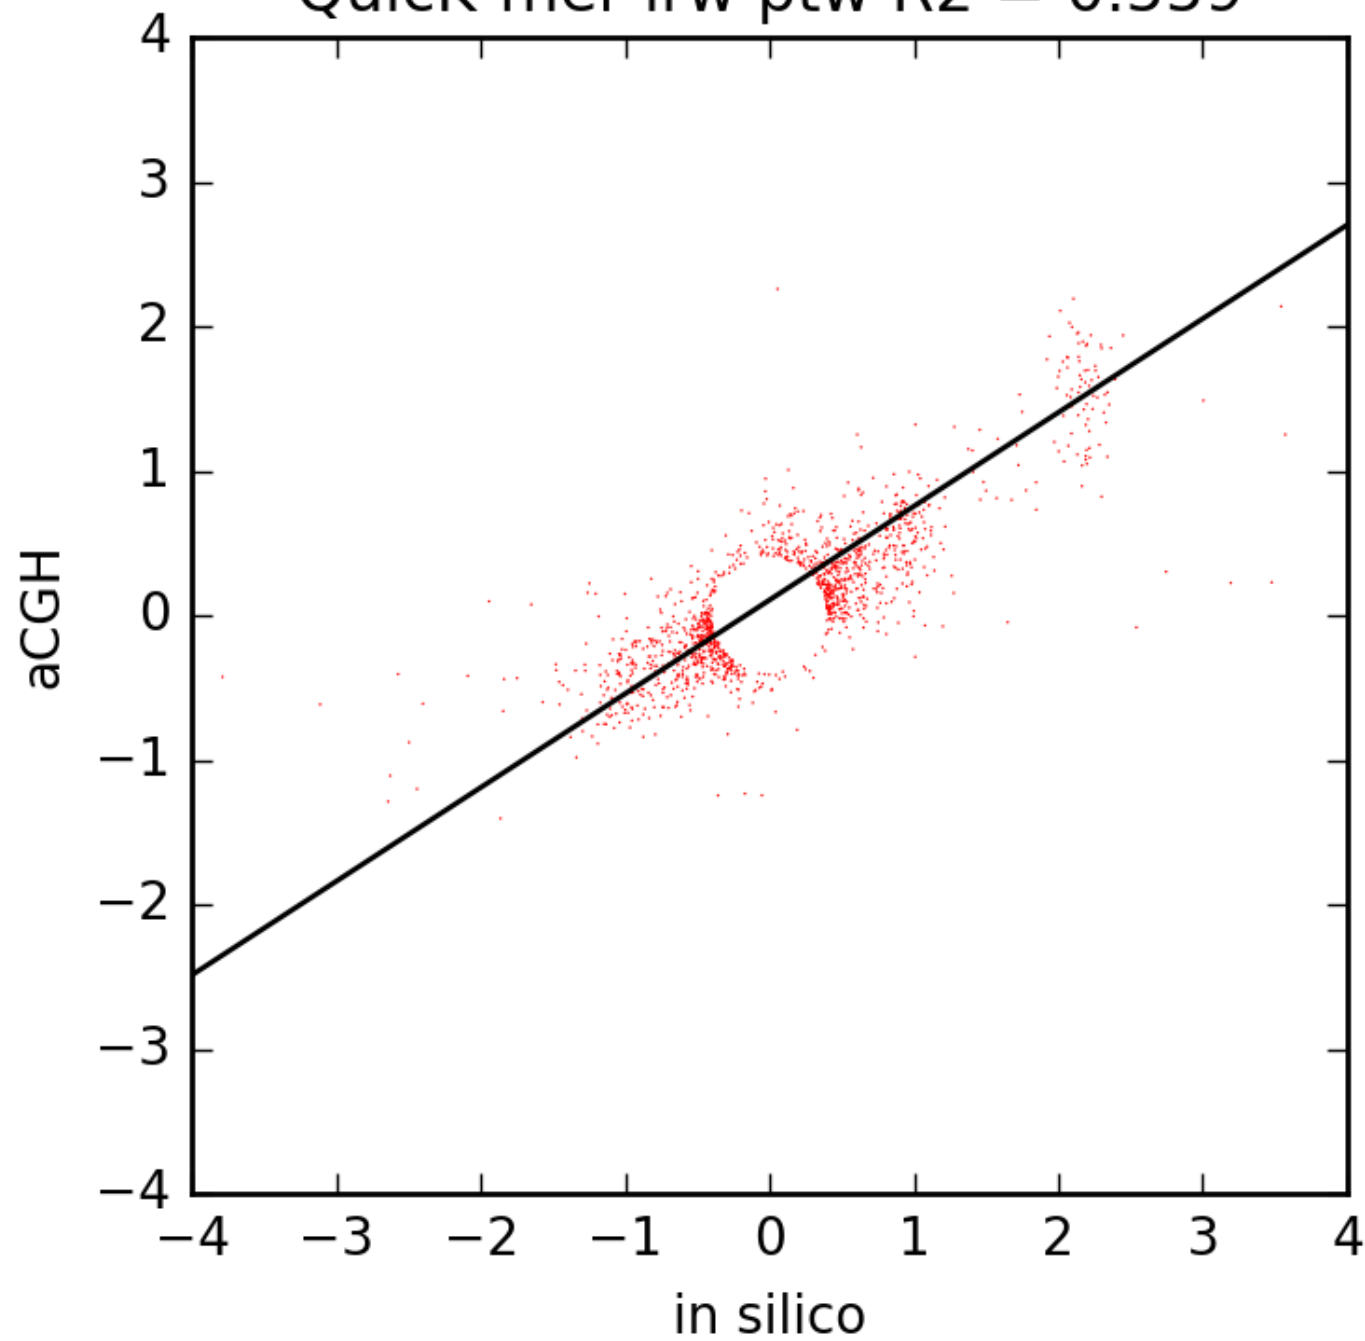

Quick-mer mxa glw R2 = 0.561

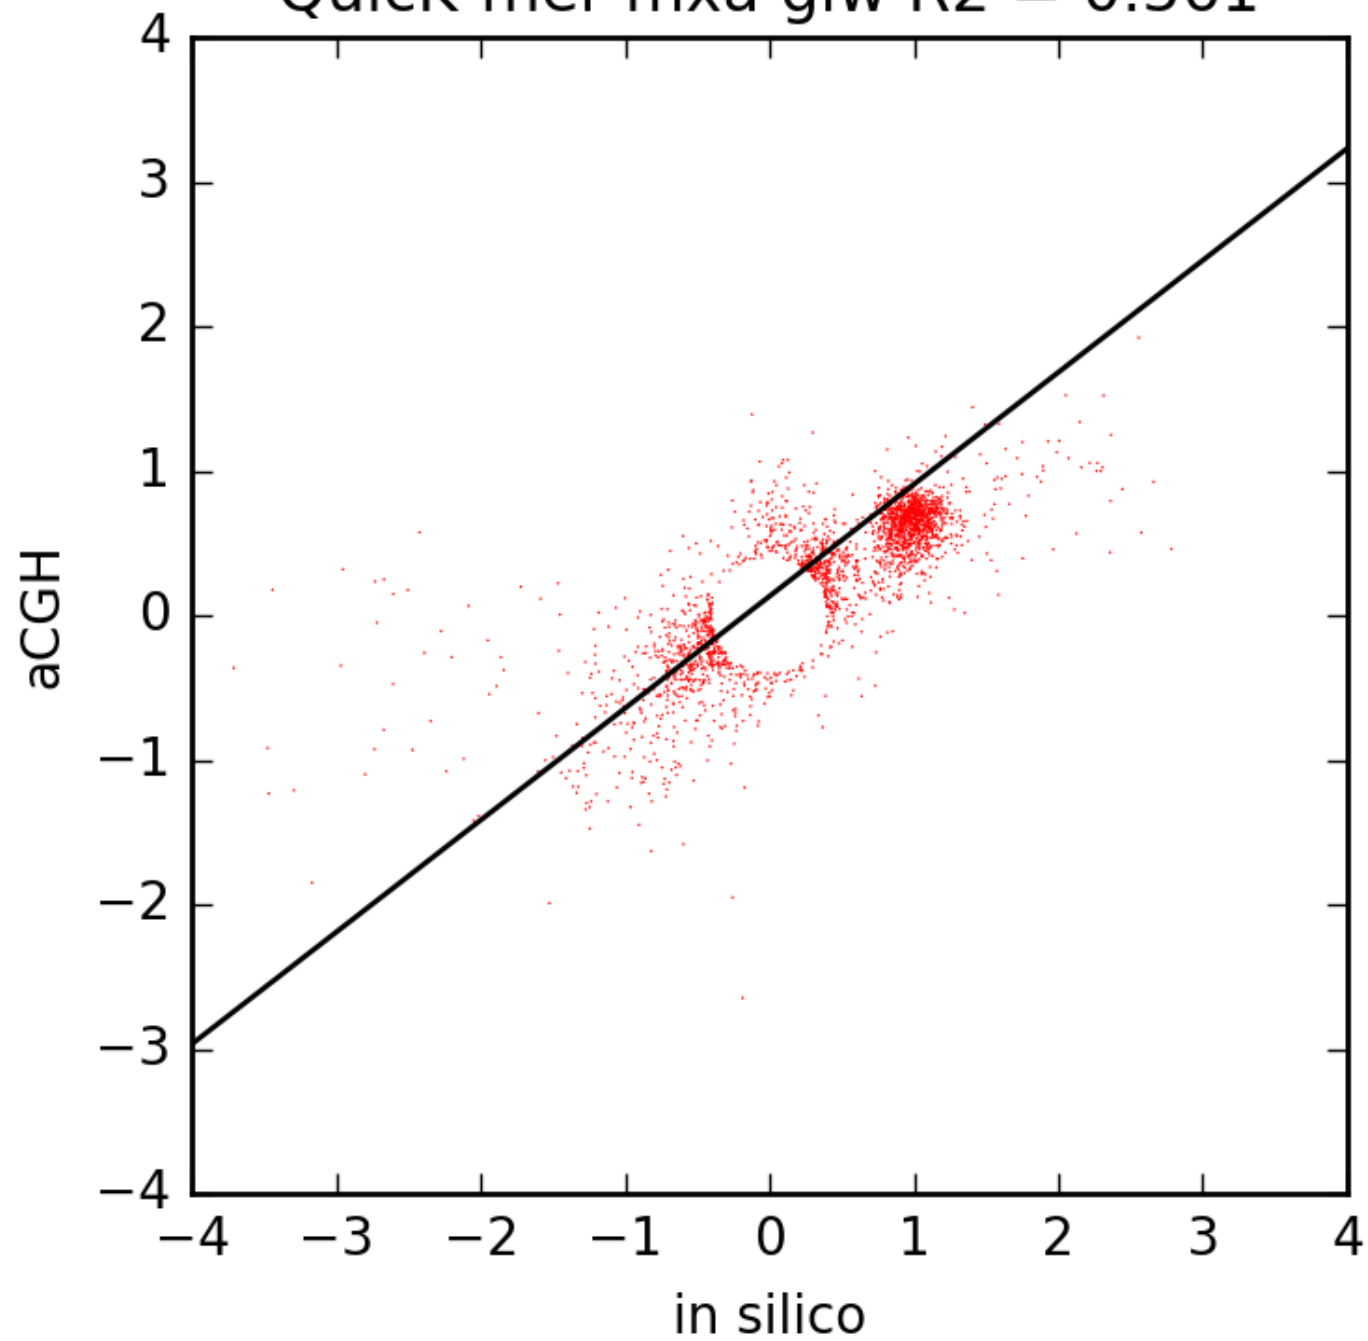

Quick-mer ptw glw R2 = 0.551

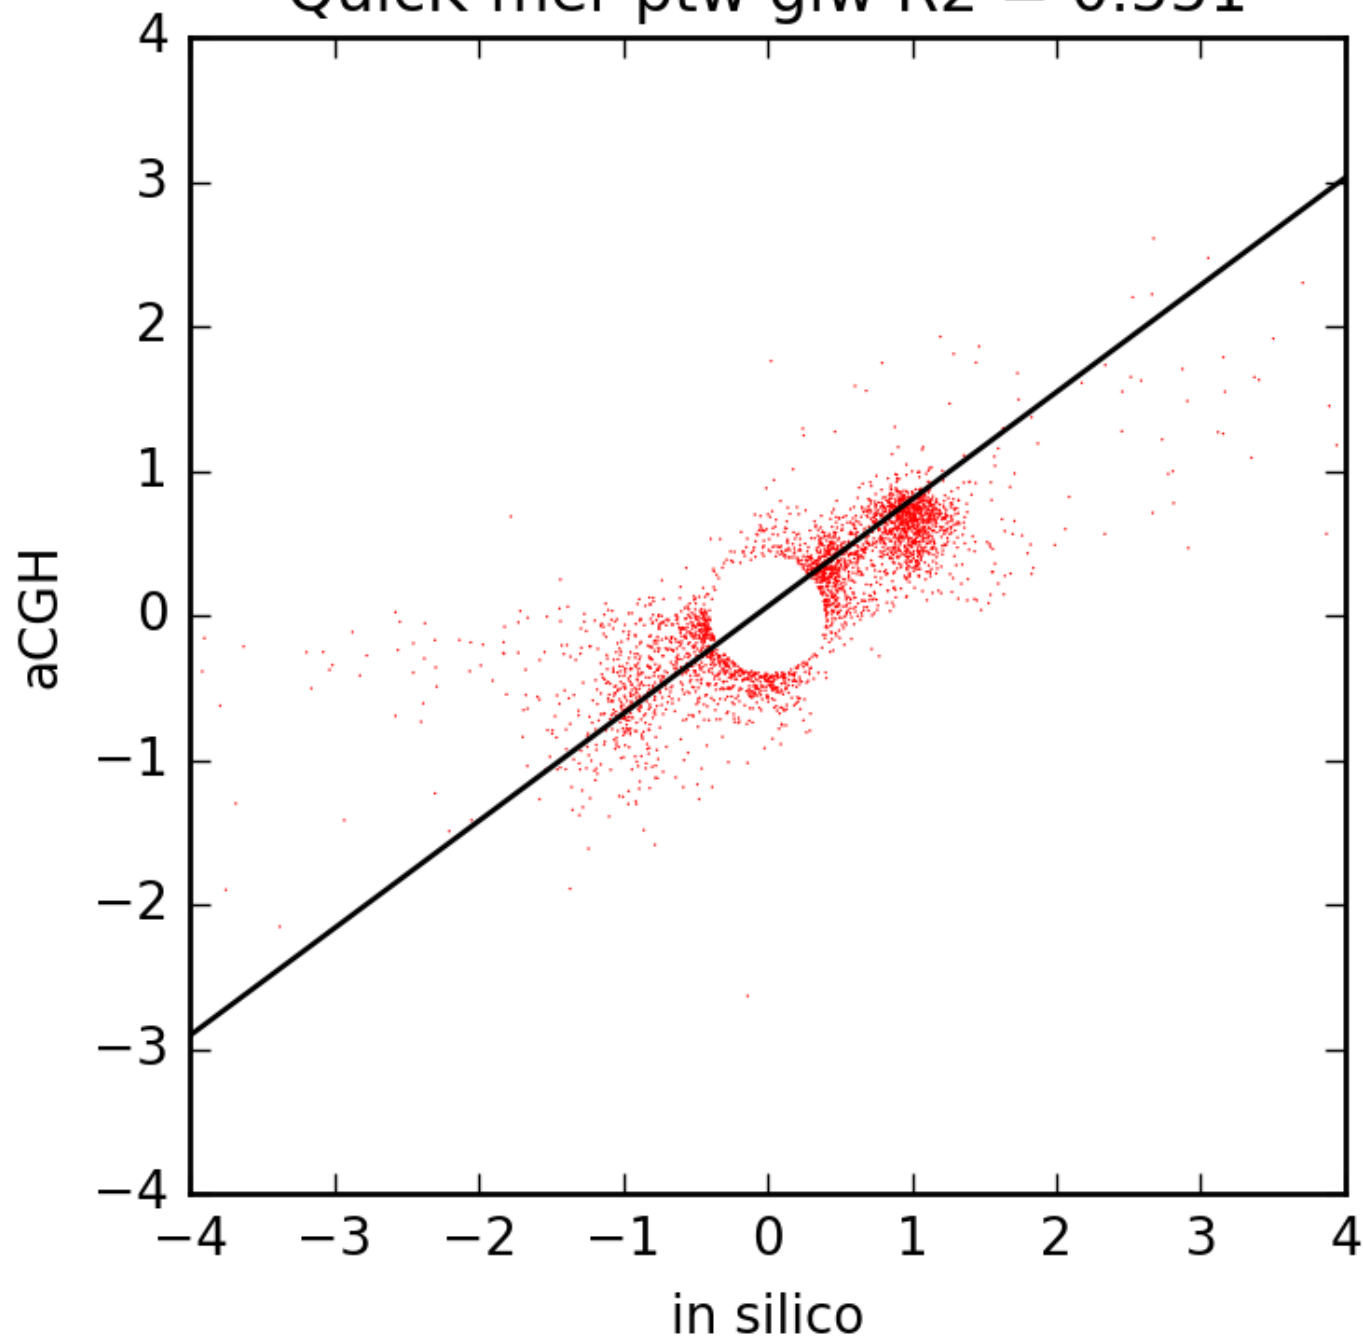

Quick-mer ptw mxa R2 = 0.528

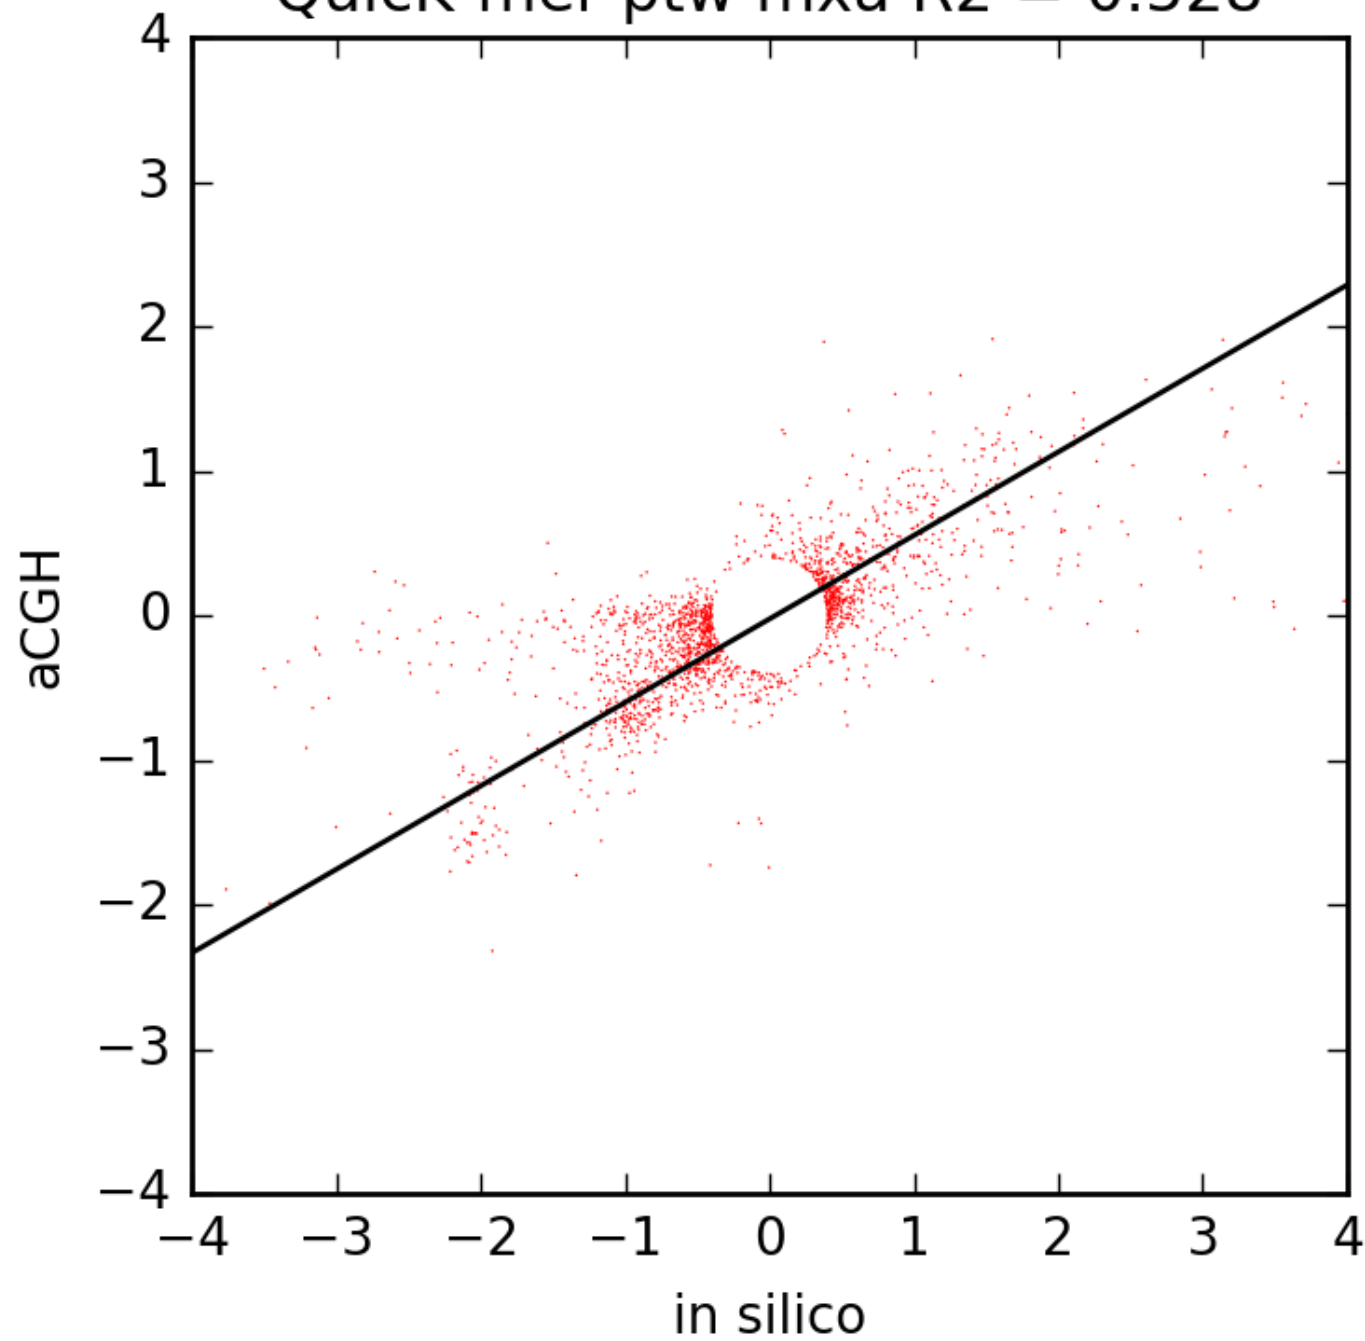

Quick-mer ysa chw R2 = 0.486

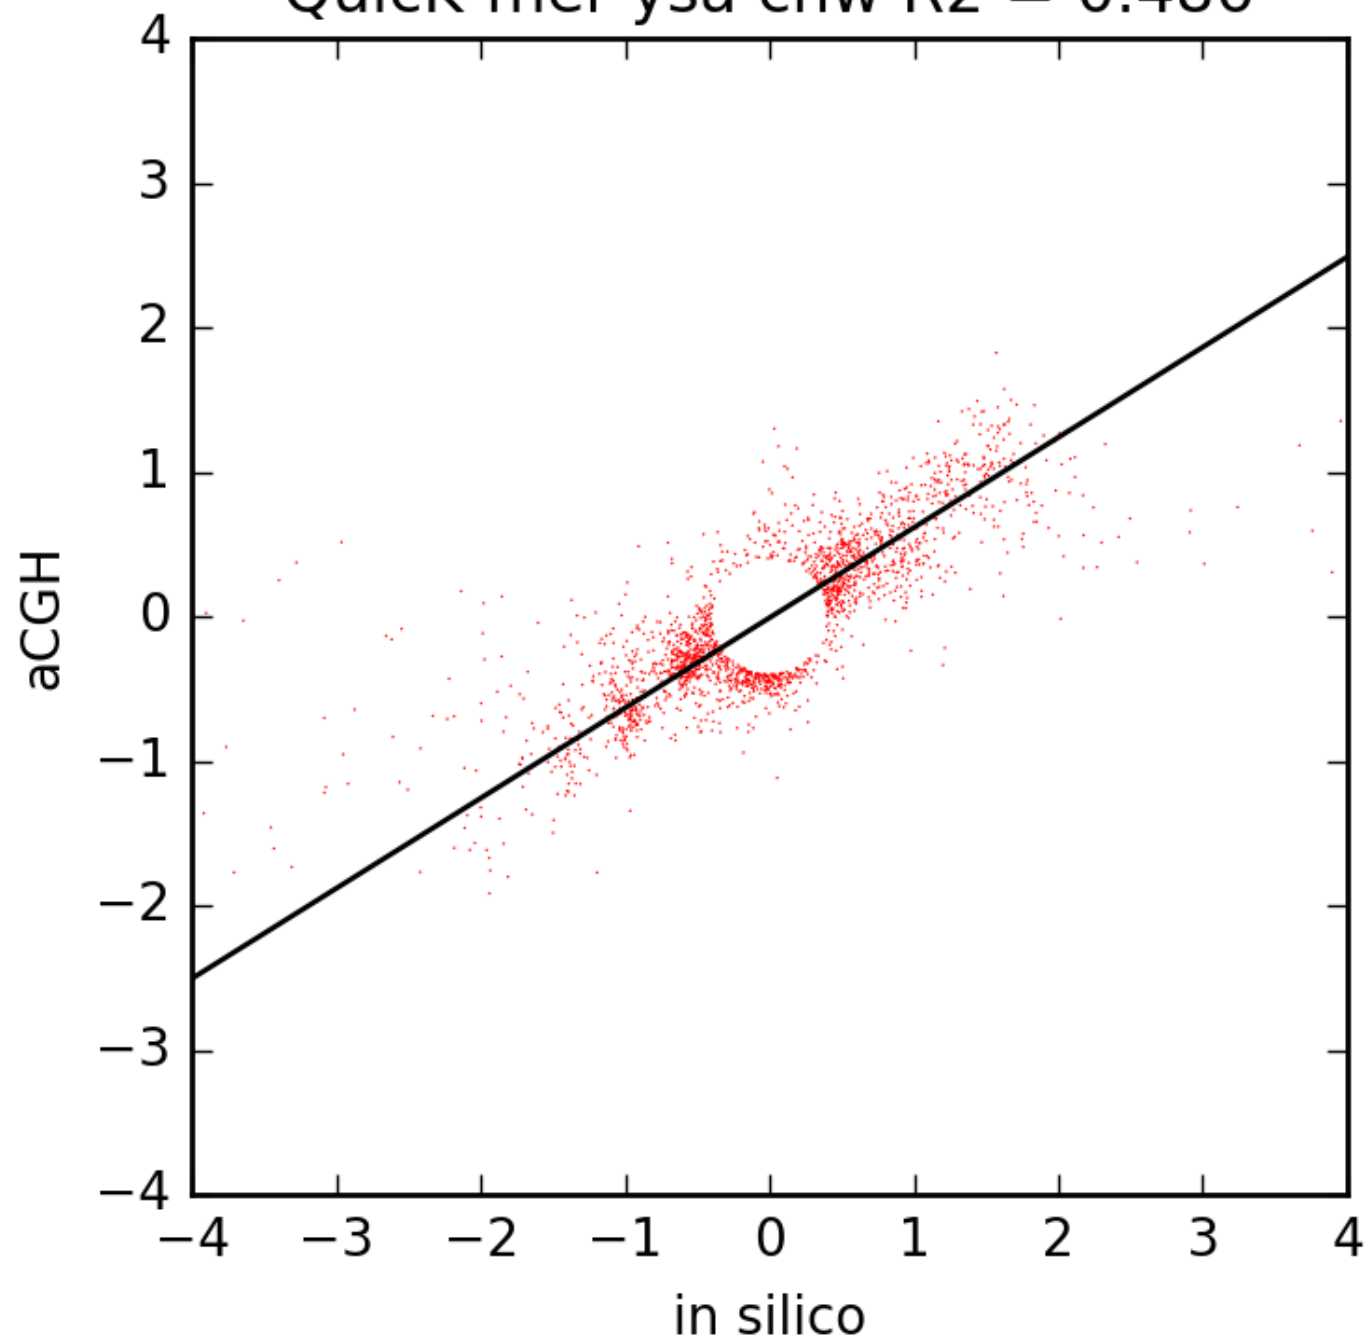

Quick-mer ysa glw R2 = 0.552

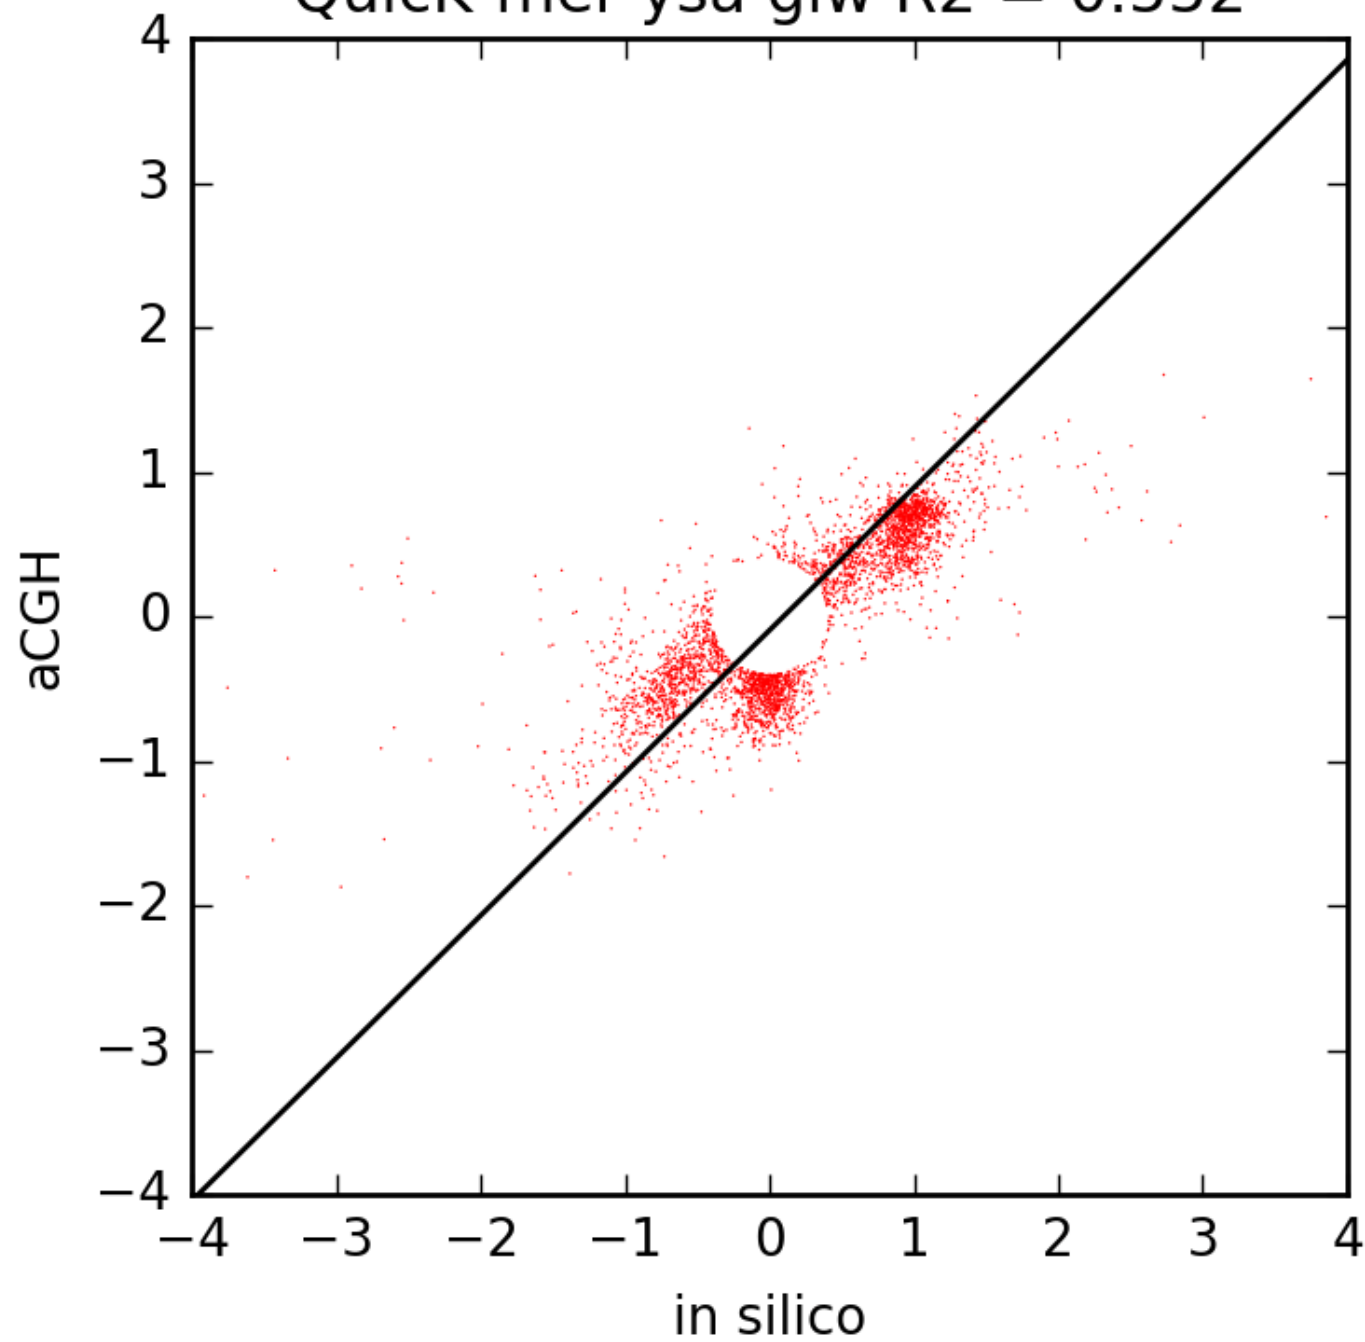

Quick-mer ysa inw R2 = 0.547

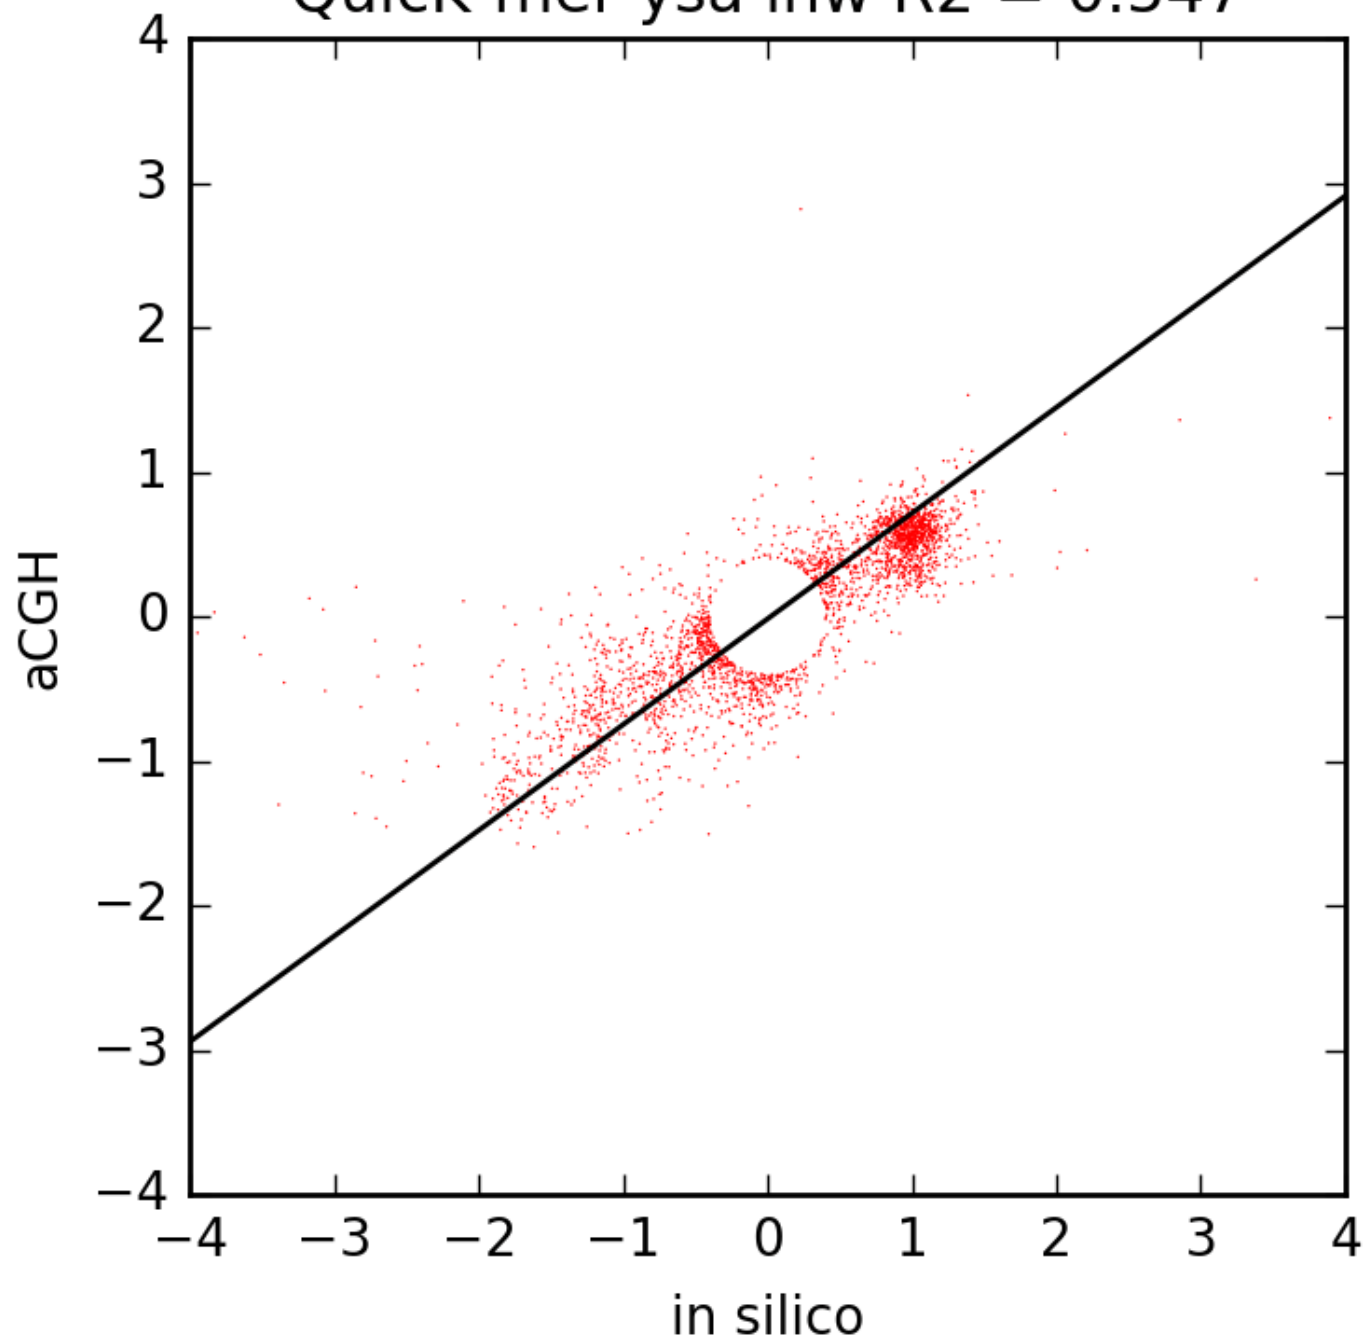

Quick-mer ysa irw R2 = 0.378

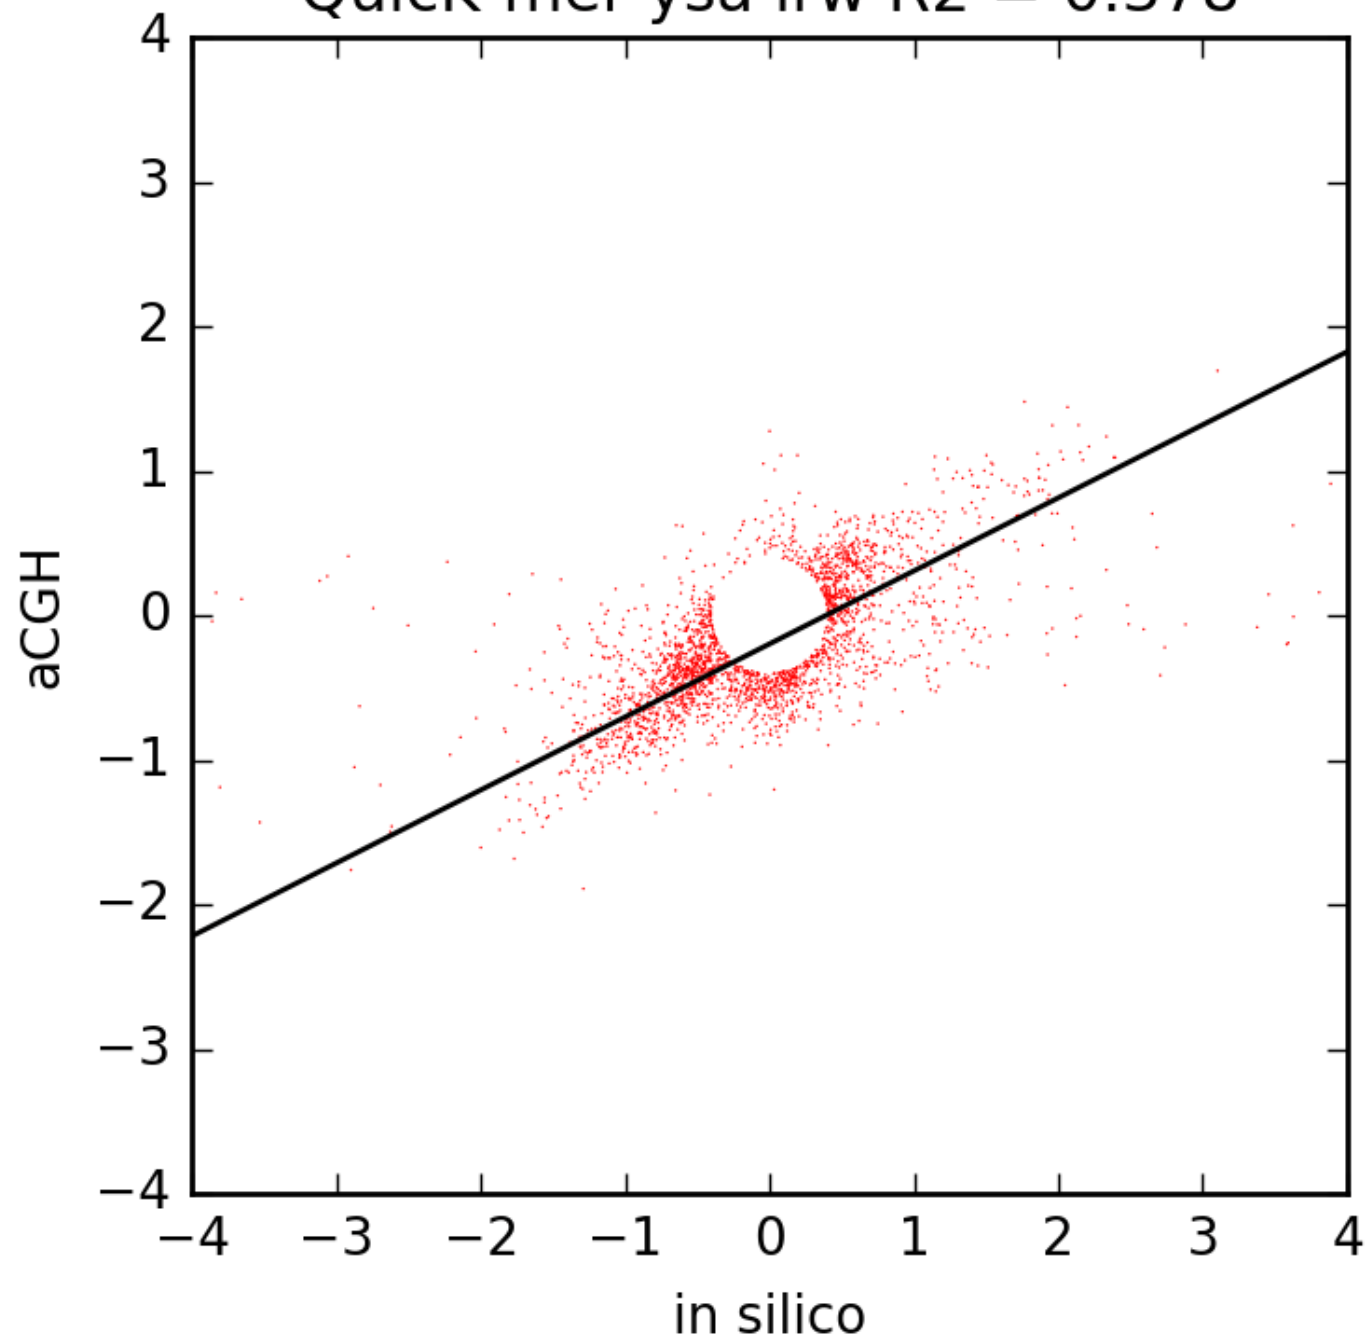



Quick-mer ysa mxa R2 = 0.535

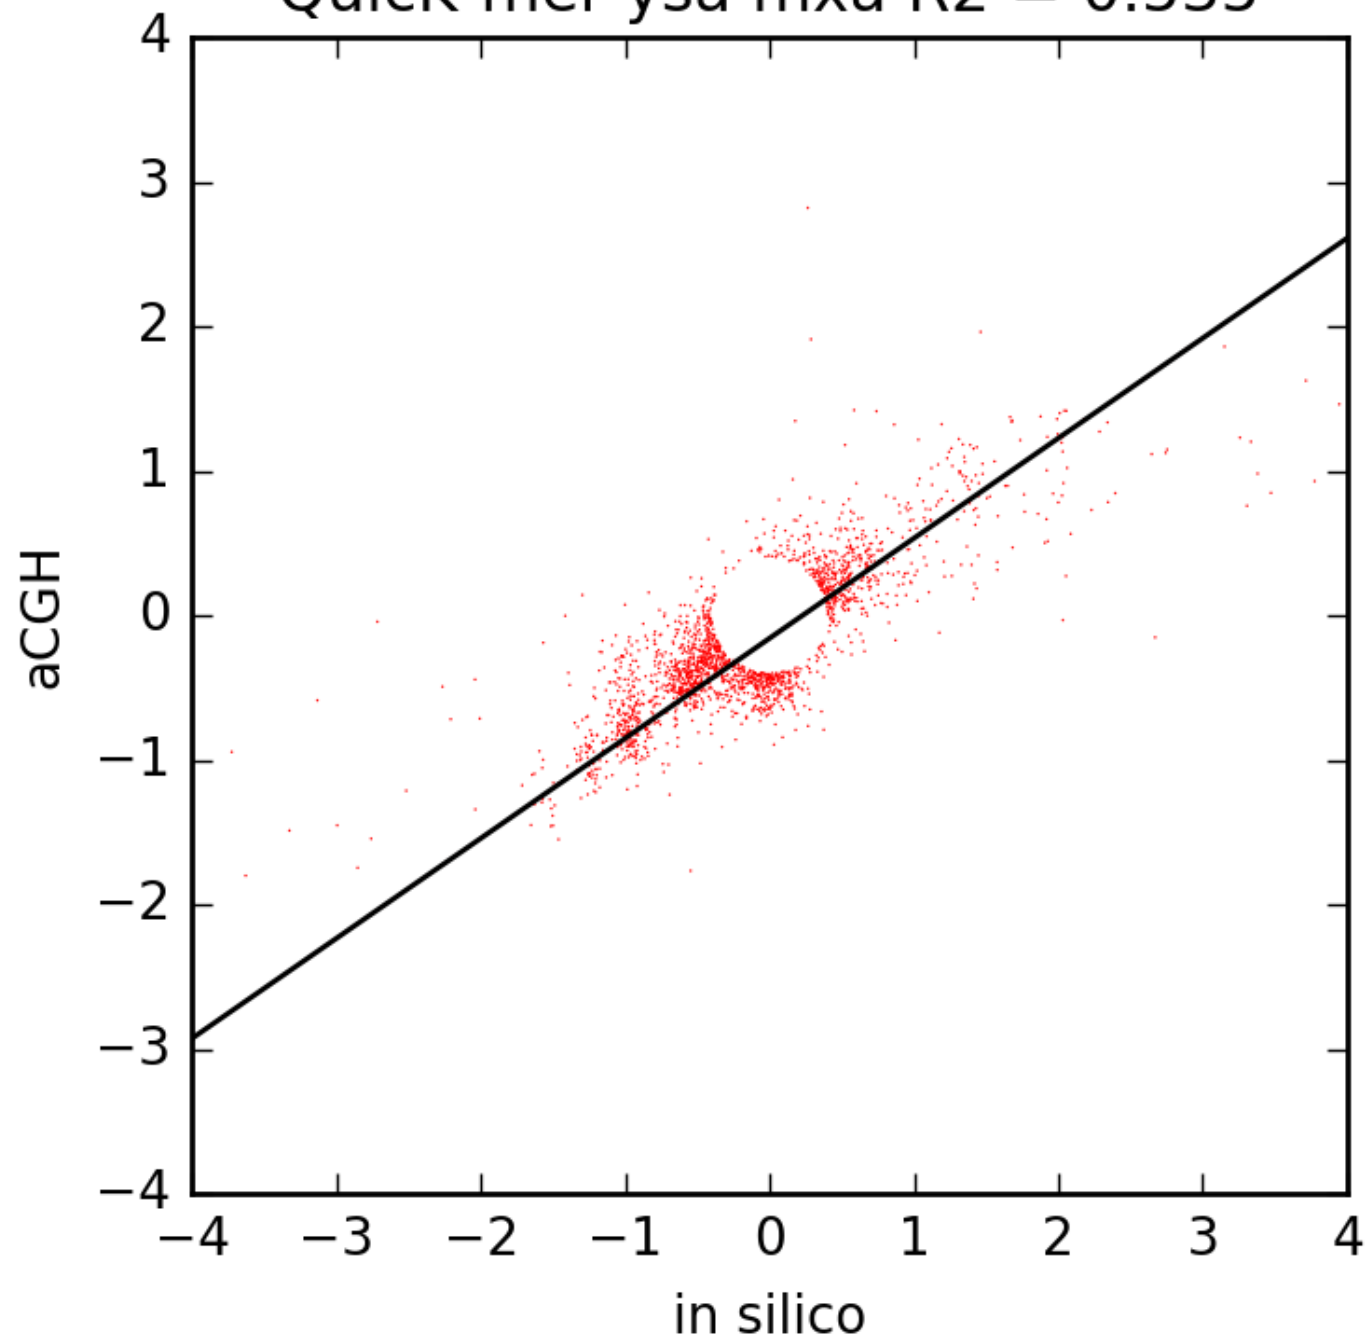

Quick-mer ysa ptw R2 = 0.445

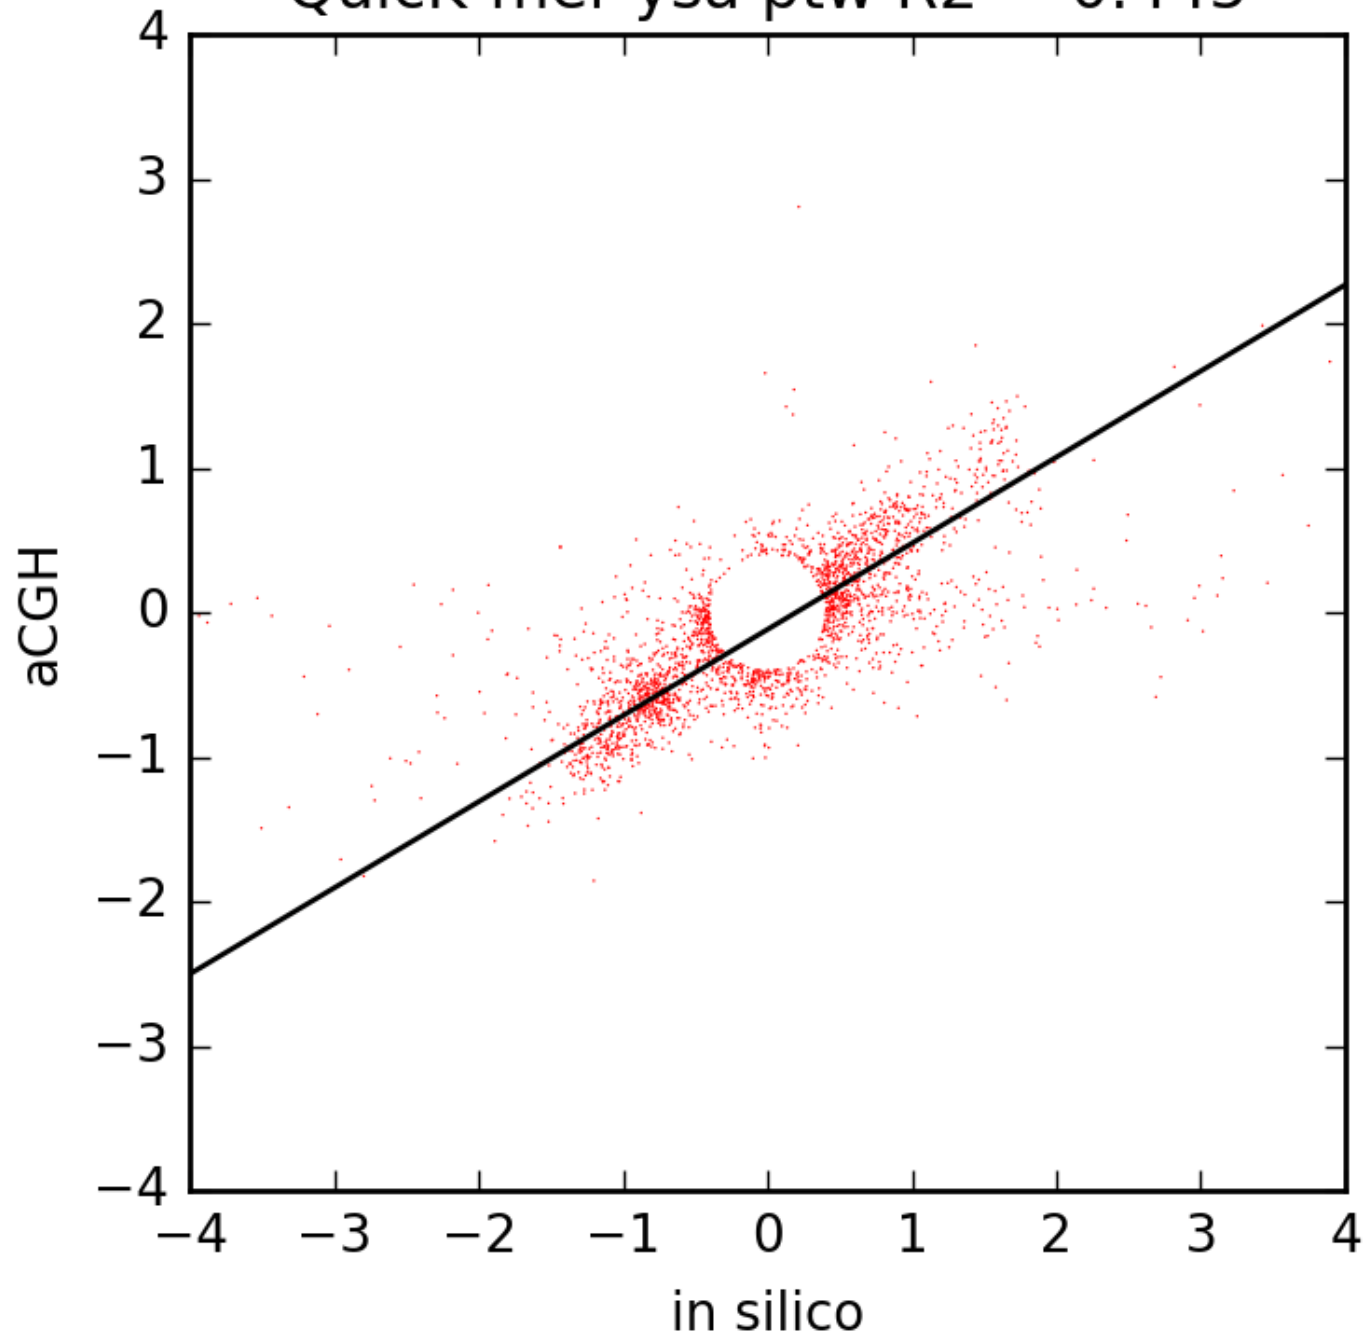

Supplement: 12915_2018_535_MOESM5_ESM.pdf [file 12915_2018_535_MOESM5_ESM.pdf]
